# Supplementary material for: Synthesis of 1-(β-coumarinyl)-1-(β-indolyl)trifluoroethanols through regioselective Friedel–Crafts alkylation of indoles with β-(trifluoroacetyl)coumarins catalyzed by Sc(OTf)3
Source: Royal Society of Chemistry journal article supplement (doi:10.1039/d0ra01237h), 2020-01-01

## Supporting Information for

# Synthesis of 1-( $\beta$ -Coumarinyl)-1-( $\beta$ -Indolyl)Trifluoroethanols through Regioselective Friedel–Crafts Alkylation of Indoles with $\beta$ -(Trifluoroacetyl)Coumarins Catalyzed by Sc(OTf)<sub>3</sub>

Lijun Shi,<sup>a,‡</sup> Ying Liu,<sup>a,‡</sup> Caixia Wang,<sup>a</sup> Xinxin Yuan,<sup>b</sup> Xiaobiao Liu,<sup>a</sup> Lulu Wu,<sup>a</sup> Zhenliang Pan,<sup>a</sup> Qicheng Yu,<sup>c</sup> Cuilian Xu<sup>\*a</sup> and Guoyu Yang<sup>\*a</sup>

<sup>a</sup> School of Science, Henan Agricultural University, Zhengzhou 450002, P. R. China. E-mail: xucuilian666@henau.edu.cn (C. L. Xu); yangguoyulxy@henau.edu.cn (G. Y. Yang).

<sup>b</sup> College of Resource and Environment, Henan Agricultural University, Zhengzhou 450002, P. R. China.

<sup>c</sup> College of Animal Science and Veterinary Medicine, Henan Agricultural University, Zhengzhou 450002, P. R. China.

‡ These two authors contributed equally to this work.

\* Corresponding authors.

## Contents

|                                                                                                 |            |
|-------------------------------------------------------------------------------------------------|------------|
| <b>1. Experimental Section.....</b>                                                             | <b>S2</b>  |
| 1.1. General.....                                                                               | S2         |
| 1.2. Preparation of $\beta$ -(trifluoroacetyl)coumarins 1a-f.....                               | S2         |
| 1.3 Optimization of reaction conditions.....                                                    | S3         |
| 1.4 Preparation of 1-( $\beta$ -coumarinyl)-1-( $\beta$ -indolyl)trifluoroethanols 3aa-3fa..... | S4         |
| 1.5 Characterization data of new compounds.....                                                 | S5         |
| <b>2. NMR Spectra for compounds 3aa-3fa.....</b>                                                | <b>S17</b> |
| <b>3. High Resolution Mass Spectra for compounds 3aa-3fa.....</b>                               | <b>S49</b> |
| <b>4. Crystal data for 3aa and 3dd.....</b>                                                     | <b>S64</b> |
| <b>5. Method of DFT.....</b>                                                                    | <b>S77</b> |

## 1. Experimental Section

### 1.1. General

All solvents and reagents used are commercially available and were used without further purification. All  $^1\text{H}$  and  $^{13}\text{C}$  NMR spectra used  $d_6$ -DMSO as a solvent to avoid the interference of peaks from residual non-deuterium solvent. The NMR data were obtained on a Bruker DPX-400 or 500 Spectrometer, respectively. The MestReNova Software was used to deal with the NMR spectra. Chemical shifts ( $\delta$ ) are reported in ppm and  $J$  values are given in hertz. In  $^1\text{H}$  NMR, the signal of TMS was set as 0.00 ppm unless noted. In  $^{13}\text{C}$  NMR, the middle signal of  $d_6$ -DMSO was set as 39.60 ppm. All the signals represent 1H or 1C except as noted. HPLC analyses for the qualitative and quantitative analysis of the products were carried out using an Agilent 1200 pump equipped with an Agilent 1200 detector. Melting points were determined on an X-5 digital microscopic melting-point apparatus (Beijing Tech Instruments Co., Beijing, China) and are uncorrected. High resolution mass spectrometry were obtained using a Waters Q-ToF MicroTM instrument. X-ray Crystallography parameters for data collection and refinement of the compounds are summarized in **Table 3**. Intensities were collected on a Rigaku Saturn 724 CCD diffractometer (Mo-K $\alpha$ ,  $\lambda = 0.71073 \text{ \AA}$ ) at a temperature of 293 K using the SMART and SAINT programs. The structures were solved by direct method and refined on F2 by full-matrix least-squares methods with SHELXTL-97 crystallographic software package. All the non-hydrogen atoms were refined with anisotropic thermal displacement coefficients. The hydrogen atoms were assigned with common isotropic displacement factors and included in the final refinement by using geometrical restrains.

### 1.2. Preparation of $\beta$ -(trifluoroacetyl)coumarins **1a-f**

$\beta$ -(trifluoroacetyl)coumarins **1a-f** were prepared according the microwave assisted solvent-free route via Knoevenagel condensation of substituted salicylaldehydes with ethyl trifluoroacetoacetate in the presence of silica-immobilized L-proline and subsequently rearrangement (see ref[31]).

Indole **2a** and substituted indoles **2b-h** were used commercially.

### 1.3 Optimization of reaction conditions

To optimize reaction condition, the effects of the catalyst (containing different Lewis acids or protic acids), the effects of the solvent, the effects of reaction temperature, the amount of catalyst, the ratio of the reactants and the moisture were investigated and shown in Table S1, which contains another 15 entries compared the Table 1 in the published article.

**Table S1.** Optimization of Reaction Conditions<sup>a</sup>

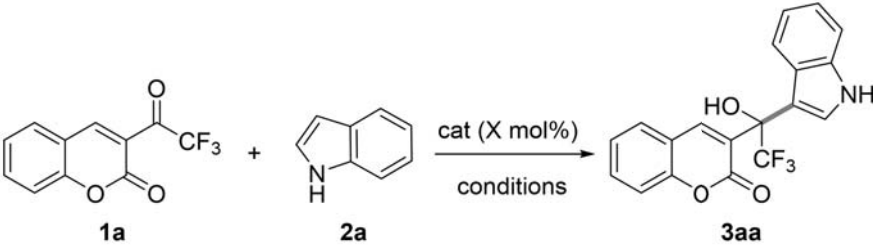

| Entry     | Catalyst                   | X        | Solvent                             | T/°C          | Time/min <sup>b</sup> | Yield/% <sup>c</sup> |
|-----------|----------------------------|----------|-------------------------------------|---------------|-----------------------|----------------------|
| 1         | None                       | -        | CH <sub>2</sub> Cl <sub>2</sub>     | 25            | 120                   | N. R.                |
| 2         | AlCl <sub>3</sub>          | 5        | CH <sub>2</sub> Cl <sub>2</sub>     | 25            | 120                   | 15                   |
| 3         | FeCl <sub>3</sub>          | 5        | CH <sub>2</sub> Cl <sub>2</sub>     | 25            | 120                   | 30                   |
| 4         | Pb(OAc) <sub>2</sub>       | 5        | CH <sub>2</sub> Cl <sub>2</sub>     | 25            | 120                   | 20                   |
| 5         | Cu(OTf) <sub>2</sub>       | 5        | CH <sub>2</sub> Cl <sub>2</sub>     | 25            | 120                   | 17                   |
| 6         | Fe(OTf) <sub>3</sub>       | 5        | CH <sub>2</sub> Cl <sub>2</sub>     | 25            | 120                   | 25                   |
| 7         | Y(OTf) <sub>3</sub>        | 5        | CH <sub>2</sub> Cl <sub>2</sub>     | 25            | 120                   | 45                   |
| 8         | <i>p</i> -TSA              | 5        | CH <sub>2</sub> Cl <sub>2</sub>     | 25            | 120                   | N. R.                |
| 9         | TfOH                       | 5        | CH <sub>2</sub> Cl <sub>2</sub>     | 25            | 120                   | 8                    |
| 10        | Sc(OTf) <sub>3</sub>       | 5        | CH <sub>2</sub> Cl <sub>2</sub>     | 25            | 120                   | 93                   |
| 11        | Sc(OTf) <sub>3</sub>       | 5        | CH <sub>2</sub> Cl <sub>2</sub>     | 25            | 300                   | 95                   |
| 12        | Sc(OTf) <sub>3</sub>       | 5        | CH <sub>2</sub> Cl <sub>2</sub>     | 25            | 30                    | 91                   |
| 13        | Sc(OTf) <sub>3</sub>       | 5        | CHCl <sub>3</sub>                   | 25            | 120                   | 90                   |
| 14        | Sc(OTf) <sub>3</sub>       | 5        | CCl <sub>4</sub>                    | 25            | 120                   | 87                   |
| 15        | Sc(OTf) <sub>3</sub>       | 5        | DCE                                 | 25            | 120                   | 82                   |
| 16        | Sc(OTf) <sub>3</sub>       | 5        | Toluene                             | 25            | 120                   | 75                   |
| 17        | Sc(OTf) <sub>3</sub>       | 5        | CH <sub>3</sub> CN                  | 25            | 120                   | 38                   |
| 18        | Sc(OTf) <sub>3</sub>       | 5        | EtOH                                | 25            | 120                   | 72                   |
| 19        | Sc(OTf) <sub>3</sub>       | 5        | HOAc                                | 25            | 120                   | 65                   |
| <b>20</b> | <b>Sc(OTf)<sub>3</sub></b> | <b>5</b> | <b>CH<sub>2</sub>Cl<sub>2</sub></b> | <b>reflux</b> | <b>20</b>             | <b>95</b>            |
| 21        | Sc(OTf) <sub>3</sub>       | 5        | CH <sub>2</sub> Cl <sub>2</sub>     | reflux        | 30                    | 92                   |
| 22        | Sc(OTf) <sub>3</sub>       | 5        | CH <sub>2</sub> Cl <sub>2</sub>     | reflux        | 90                    | 88                   |
| 23        | Sc(OTf) <sub>3</sub>       | 5        | CHCl <sub>3</sub>                   | 45            | 30                    | 83                   |

|                 |                      |     |                                 |        |     |    |
|-----------------|----------------------|-----|---------------------------------|--------|-----|----|
| 24              | Sc(OTf) <sub>3</sub> | 5   | CHCl <sub>3</sub>               | 45     | 90  | 88 |
| 25              | Sc(OTf) <sub>3</sub> | 5   | CHCl <sub>3</sub>               | 45     | 120 | 88 |
| 26              | Sc(OTf) <sub>3</sub> | 5   | CHCl <sub>3</sub>               | reflux | 20  | 81 |
| 27              | Sc(OTf) <sub>3</sub> | 5   | CHCl <sub>3</sub>               | reflux | 40  | 83 |
| 28              | Sc(OTf) <sub>3</sub> | 5   | CHCl <sub>3</sub>               | reflux | 60  | 80 |
| 29              | Sc(OTf) <sub>3</sub> | 5   | CHCl <sub>3</sub>               | reflux | 100 | 70 |
| 30              | Sc(OTf) <sub>3</sub> | 7.5 | CH <sub>2</sub> Cl <sub>2</sub> | reflux | 30  | 91 |
| 31              | Sc(OTf) <sub>3</sub> | 10  | CH <sub>2</sub> Cl <sub>2</sub> | reflux | 30  | 90 |
| 32 <sup>d</sup> | Sc(OTf) <sub>3</sub> | 5   | CH <sub>2</sub> Cl <sub>2</sub> | reflux | 20  | 92 |
| 33 <sup>e</sup> | Sc(OTf) <sub>3</sub> | 5   | CH <sub>2</sub> Cl <sub>2</sub> | reflux | 10  | 20 |
| 34 <sup>e</sup> | Sc(OTf) <sub>3</sub> | 5   | CH <sub>2</sub> Cl <sub>2</sub> | reflux | 20  | 45 |
| 35 <sup>e</sup> | Sc(OTf) <sub>3</sub> | 5   | CH <sub>2</sub> Cl <sub>2</sub> | reflux | 60  | 61 |

<sup>a</sup> The reactions were performed on a 0.2 mmol scale using **1a** (1.0 equiv.) and **2a** (1.0 equiv in entries 1-31 and 33-35; 1.1 equiv in entry 32) in 2.0 mL of solvent under air atmosphere. The reactants, catalysts and solvents were used without further treatment (except entries 33-35).

<sup>b</sup> The reactions were monitored by HPLC analysis using a <sup>18</sup>C chromatographic column. Mobile phase was MeOH:H<sub>2</sub>O = 75%:25% and flow velocity was 1.0 mL/min.

<sup>c</sup> Isolated yield.

<sup>d</sup> The ratio of **1a**:**2a** = 1:1.1

<sup>e</sup> The reactants and catalyst (**1a**, **2a** and Sc(OTf)<sub>3</sub>) were dried under vacuum at room temperature in a desiccator for 2 hours to remove moisture. The solvent (CH<sub>2</sub>Cl<sub>2</sub>) was distilled over phosphorus pentoxide.

#### 1.4 Preparation of 1-(β-coumarinyl)-1-(β-indolyl)trifluoroethanols **3aa-3fa**

In a typical experiment of Friedel-Crafts alkylation of indoles, a solution of β-(trifluoroacetyl)coumarin **1a** (0.2 mmol), indole **2a** (0.2 mmol) and Sc(OTf)<sub>3</sub> (0.01 mmol, 5% eq) in 2 mL CH<sub>2</sub>Cl<sub>2</sub> was stirred under atmosphere at 45 °C for 20 minutes. The reaction was monitored by HPLC. When the reaction completed, the mixture was washed by water (5 mL×3). Then the water phase was extracted by CH<sub>2</sub>Cl<sub>2</sub> (5 mL×3). The combined solution was evaporated under reduced pressure. The crude product was recrystallized from ethyl acetate and petroleum ether (1:10), to afford the product **3aa** as a light yellow powder (95% yield).



## 1.5 Characterization data of new compounds

1-(coumarin-3-yl)-1-(1*H*-indol-3-yl)-2,2,2-trifluoroethanol (**3aa**).

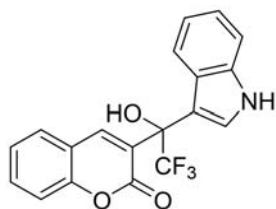

Yield 95%, light yellow powder, mp 244.6-244.9 °C. <sup>1</sup>H-NMR (400 MHz) δ 11.30 (s, NH), 8.69 (s), 7.99 (d, *J* = 7.4 Hz), 7.64 (t, *J* = 7.6 Hz), 7.48 (s), 7.44-7.34(m, 5H), 7.07 (t, *J* = 7.5 Hz), 6.89 (t, *J* = 7.5 Hz). <sup>13</sup>C NMR (101 MHz) δ 157.46(C=O), 153.55(C-O), 143.05, 136.30, 132.73, 129.68, 125.47(q, *J* = 287.9 Hz, CF<sub>3</sub>), 125.39, 125.34, 124.80, 124.37, 121.28, 119.65, 119.12, 118.42, 115.87, 111.91, 110.40, 74.49(q, *J* = 30.0 Hz, C-CF<sub>3</sub>). <sup>19</sup>F NMR (376 MHz) δ -74.21(s, 3F, CF<sub>3</sub>). (The chemical shift was obtained from the MestReNova software without correction.) HRMS: *m/z* calcd for C<sub>19</sub>H<sub>11</sub>F<sub>3</sub>NO<sub>3</sub>: 358.0691 [M-H]<sup>+</sup>; found: 358.0689.

1-(coumarin-3-yl)-1-(2-methyl-1*H*-indol-3-yl)-2,2,2-trifluoroethanol (**3ab**).

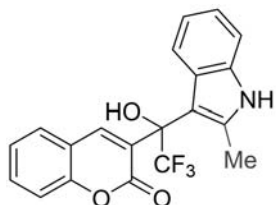

Yield 82%, brown powder, mp 161.2-163.7 °C. <sup>1</sup>H NMR (500 MHz) δ 11.07 (s, NH), 8.43 (s), 8.03 (dd, *J* = 7.7, 1.2 Hz), 7.66 (td, *J* = 7.8, 1.2 Hz), 7.42 (td, *J* = 7.4, 0.6 Hz, 2H), 7.41 (d, *J* = 8.4 Hz), 7.32 (d, *J* = 7.6 Hz), 7.25 (d, *J* = 8.0 Hz), 6.97 – 6.91 (m, 2H), 6.80 (t, *J* = 7.6 Hz), 2.41 (s, 3H, CH<sub>3</sub>). <sup>13</sup>C NMR (126 MHz) δ 157.14 (C=O), 153.21 (C-O), 140.21, 134.80, 134.49, 132.67, 129.82, 126.99, 126.08, 125.86 (q, *J* = 284.5 Hz, CF<sub>3</sub>), 124.84, 119.95, 119.33, 118.71, 118.05, 115.86, 110.61, 105.89, 75.93 (q, *J* = 29.6 Hz, C-CF<sub>3</sub>), 13.76(CH<sub>3</sub>). HRMS: *m/z* calcd for C<sub>20</sub>H<sub>13</sub>F<sub>3</sub>NO<sub>3</sub>: 372.0848 [M-H]<sup>+</sup>; found: 372.0845.

1-(coumarin-3-yl)-1-(4-methoxy-1*H*-indol-3-yl)-2,2,2-trifluoroethanol (**3ac**).

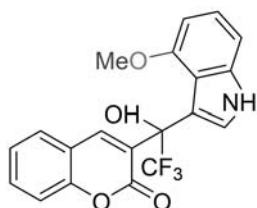

Yield 80%, light yellow powder, mp 190.7-193.7 °C. <sup>1</sup>H NMR (500 MHz) δ 11.31 (s, *NH*), 8.22 (s), 7.87 (d, *J* = 7.7 Hz), 7.64 (td, *J* = 8.0, 1.0 Hz), 7.43 (d, *J* = 8.3 Hz), 7.39 – 7.35 (m, 2H), 7.13 – 7.08 (m), 7.06 – 7.03 (m), 7.01 (t, *J* = 7.7 Hz), 6.40 (dd, *J* = 7.3, 0.7 Hz), 3.46 (s, 3H, *OCH*<sub>3</sub>). <sup>13</sup>C NMR (126 MHz) δ 159.15 (*C=O*), 153.08 (*C–O*), 152.37 (*C–O*), 143.04, 138.10, 132.48, 129.18, 126.12, 125.68 (q, *J* = 287.7 Hz, *CF*<sub>3</sub>), 124.86, 123.22, 122.55, 118.70, 115.83, 115.25, 111.35, 105.30, 100.36, 75.17 (q, *J* = 28.9 Hz, *C–CF*<sub>3</sub>), 54.90 (*OCH*<sub>3</sub>). HRMS: *m/z* calcd for C<sub>20</sub>H<sub>13</sub>F<sub>3</sub>NO<sub>4</sub>: 388.0797 [*M–H*]<sup>+</sup>; found: 388.0795.

1-(coumarin-3-yl)-1-(4-benzyloxy-1*H*-indol-3-yl)-2,2,2-trifluoroethanol (**3ad**).

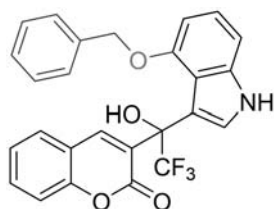

Yield 85%, light yellow powder, mp 251.0-253.1 °C. <sup>1</sup>H NMR (500 MHz) δ 11.35 (s, *NH*), 8.05 (s), 7.59 (t, *J* = 7.8 Hz), 7.50 (d, *J* = 7.7 Hz), 7.39 (s), 7.28 (t, *J* = 7.5 Hz), 7.24 (tt, *J* = 7.0, 1.6 Hz), 7.19 – 7.10 (m, 5H), 7.03 (d, *J* = 8.1 Hz), 6.95 (t, *J* = 7.9 Hz), 6.40 (d, *J* = 7.8 Hz), 5.04 (d, *J* = 12.8 Hz, *CHH–O*), 4.91 (d, *J* = 12.8 Hz, *CHH–O*). <sup>13</sup>C NMR (126 MHz) δ 158.90 (*C=O*), 153.08 (*C–O*), 151.21 (*C–O*), 143.55, 138.28, 136.93, 132.42, 129.17, 128.25 (2C), 127.62, 127.23 (2C), 125.84, 125.69 (q, *J* = 288.2 Hz, *CF*<sub>3</sub>), 124.62, 123.55, 122.40, 118.45, 115.73, 115.36, 110.95, 105.32, 101.47, 75.27 (q, *J* = 29.5 Hz, *C–CF*<sub>3</sub>), 69.16 (*OCH*<sub>2</sub>). HRMS *m/z* calcd for C<sub>26</sub>H<sub>17</sub>F<sub>3</sub>NO<sub>4</sub>: 464.1110 [*M–H*]<sup>+</sup>; found: 464.1106.

1-(coumarin-3-yl)-1-(5-methyl-1*H*-indol-3-yl)-2,2,2-trifluoroethanol (**3ae**).

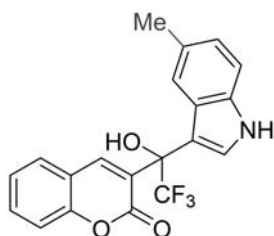

Yield 88%, white powder, mp 181.6-183.2 °C. <sup>1</sup>H NMR (500 MHz) δ 11.14 (s, *NH*), 8.63 (s), 7.99 (d, *J* = 7.0 Hz), 7.65 (d, *J* = 7.0 Hz), 7.42 – 7.38 (m, 3H), 7.32 – 7.24 (m, 2H), 7.20 – 7.15 (m), 6.92 – 6.87 (m), 2.21 (s, 3H, *CH*<sub>3</sub>). <sup>13</sup>C NMR (126 MHz) δ

157.53 (C=O), 153.47 (C–O), 142.92, 134.63, 132.70, 129.62, 127.36, 125.60, 125.44 (q,  $J = 287.6$  Hz, CF<sub>3</sub>), 125.24, 124.79, 124.39, 122.85, 119.32, 118.37, 115.83, 111.55, 109.76, 74.65 (q,  $J = 29.7$  Hz, C–CF<sub>3</sub>), 21.43 (CH<sub>3</sub>). HRMS  $m/z$  calcd for C<sub>20</sub>H<sub>13</sub>F<sub>3</sub>NO<sub>3</sub>: 372.0848 [M–H]<sup>+</sup>; found: 372.0846.

1-(coumarin-3-yl)-1-(5-methoxy-1*H*-indol-3-yl)-2,2,2-trifluoroethanol (**3af**).

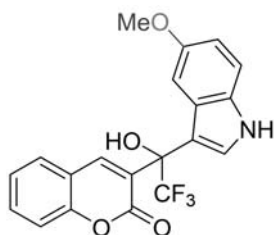

Yield 79%, gray powder, mp 172.4–174.0 °C. <sup>1</sup>H NMR (500 MHz)  $\delta$  11.12 (s, NH), 8.66 (s), 8.00 (dd,  $J = 8.3, 1.5$  Hz), 7.66 (td,  $J = 7.9, 1.1$  Hz), 7.43 – 7.39 (m, 3H), 7.31 (d,  $J = 8.8$  Hz), 7.25 (s, OH), 6.80 (s), 6.74 (dd,  $J = 8.8, 2.3$  Hz), 3.51 (s, 3H, OCH<sub>3</sub>). <sup>13</sup>C NMR (126 MHz)  $\delta$  157.45 (C=O), 153.46 (C–O), 153.04 (C–O), 142.80, 132.72, 131.46, 129.58, 125.75, 125.42 (q,  $J = 287.6$  Hz, CF<sub>3</sub>), 125.29, 125.02, 124.81, 118.32, 115.81, 112.45, 110.81, 109.93, 102.04, 74.56 (q,  $J = 30.1$  Hz, C–CF<sub>3</sub>), 55.14 (OCH<sub>3</sub>). HRMS  $m/z$  calcd for C<sub>20</sub>H<sub>13</sub>F<sub>3</sub>NO<sub>4</sub>: 388.0797 [M–H]<sup>+</sup>; found: 388.0795.

1-(coumarin-3-yl)-1-(5-chloro-1*H*-indol-3-yl)-2,2,2-trifluoroethanol (**3ag**).

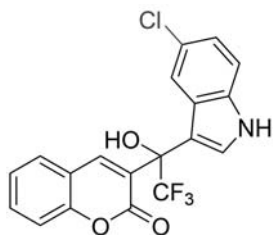

Yield 93%, white powder, mp 207.2–207.8 °C. <sup>1</sup>H NMR (400 MHz)  $\delta$  11.49 (d,  $J = 1.9$  Hz, NH), 8.65 (s), 8.01 (dd,  $J = 7.7, 1.2$  Hz), 7.68 (td,  $J = 8.2, 1.5$  Hz), 7.52 (s, OH), 7.45 – 7.40 (m, 4H), 7.38 (d,  $J = 1.9$  Hz), 7.08 (dd,  $J = 8.6, 2.1$  Hz). <sup>13</sup>C NMR (101 MHz, DMSO)  $\delta$  157.37 (C=O), 153.49 (C–O), 142.91, 134.72, 132.84, 129.72, 126.48, 126.25, 125.29 (q,  $J = 288.1$  Hz, CF<sub>3</sub>), 124.88, 124.84, 123.58, 121.26, 118.88, 118.30, 115.88, 113.45, 110.30, 74.40 (q,  $J = 30.2$  Hz, C–CF<sub>3</sub>). HRMS  $m/z$  calcd for C<sub>19</sub>H<sub>11</sub>ClF<sub>3</sub>NNaO<sub>3</sub>: 416.0277 [M+Na]<sup>+</sup>; found: 416.0273.

1-(coumarin-3-yl)-1-(6-bromo-1*H*-indol-3-yl)-2,2,2-trifluoroethanol (**3ah**).

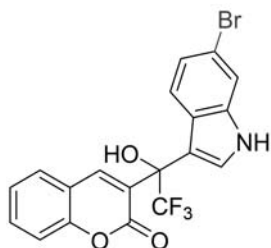

Yield 92%, white powder, mp 218.2~219.0 °C. <sup>1</sup>H NMR (400 MHz) δ 11.40 (d, *J* = 1.6 Hz, *NH*), 8.66 (s), 7.99 (dd, *J* = 7.8, 1.1 Hz), 7.66 (td, *J* = 7.8, 1.4 Hz), 7.61 (d, *J* = 1.6 Hz), 7.49 (s, *OH*), 7.44 – 7.38 (m, 3H), 7.30 (d, *J* = 8.6 Hz), 7.04 (dd, *J* = 8.6, 1.7 Hz). <sup>13</sup>C NMR (101 MHz) δ 157.32 (*C=O*), 153.52 (*C–O*), 143.11, 137.12, 132.79, 129.71, 125.39, 125.30 (q, *J* = 288.3 Hz, *CF*<sub>3</sub>), 124.97, 124.79, 124.44, 122.01, 121.33, 118.33, 115.86, 114.38, 114.04, 110.80, 74.06 (q, *J* = 30.3 Hz, *C–CF*<sub>3</sub>). HRMS *m/z* calcd for C<sub>19</sub>H<sub>11</sub>BrF<sub>3</sub>NNaO<sub>3</sub>: 459.9772 [*M*+Na]<sup>+</sup>; found:459.9770.

1-(6-chlorocoumarin-3-yl)-1-(1*H*-indol-3-yl)-2,2,2-trifluoroethanol (**3ba**).

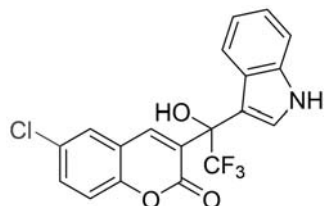

Yield 88%, yellow powder, mp 252.8-252.9 °C. <sup>1</sup>H NMR (400 MHz) δ 11.27 (s, *NH*), 8.70 (s), 8.18 (d, *J* = 2.5 Hz), 7.69 (dd, *J* = 8.8, 2.5 Hz), 7.45 – 7.41 (m, 2H), 7.40 (d, *J* = 8.2 Hz), 7.35 (s), 7.32 (d, *J* = 8.0 Hz), 7.05 (t, *J* = 7.5 Hz), 6.87 (t, *J* = 7.5 Hz). <sup>13</sup>C NMR (101 MHz) δ 156.74 (*C=O*), 152.13 (*C–O*), 141.90, 136.19, 132.24, 128.72, 128.51, 126.51, 125.28 (q, *J* = 287.4 Hz, *CF*<sub>3</sub>), 125.24, 124.33, 121.21, 119.74, 119.53, 119.08, 117.85, 111.82, 110.05, 74.35 (q, *J* = 29.8 Hz, *C–CF*<sub>3</sub>). HRMS *m/z* calcd for C<sub>19</sub>H<sub>10</sub>ClF<sub>3</sub>NO<sub>3</sub>: 392.0301 [*M–H*]<sup>+</sup>; found: 392.0294.

1-(6-chlorocoumarin-3-yl)-1-(4-methoxy-1*H*-indol-3-yl)-2,2,2-trifluoroethanol (**3bc**).

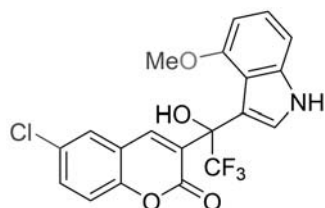

Yield 83%, yellow-green powder, mp 203.7-204.8 °C. <sup>1</sup>H NMR (400 MHz) δ 11.32 (d,

$J = 1.9$  Hz), 8.34 (s), 8.10 (d,  $J = 2.5$  Hz), 7.66 (dd,  $J = 8.8, 2.5$  Hz), 7.46 (d,  $J = 8.9$  Hz), 7.38 (s, OH), 7.06 – 6.98 (m, 3H), 6.41 (dd,  $J = 7.1, 1.1$  Hz), 3.47 (s, 3H).  $^{13}\text{C}$  NMR (101 MHz)  $\delta$  158.21 (C=O), 152.36 (C–O), 151.81, 141.91, 138.07, 132.00, 128.62, 128.26, 127.59, 125.59 (q,  $J = 287.7$  Hz), 123.32, 122.53, 120.15, 117.84, 115.25, 111.09, 105.32, 100.32, 74.94 (q,  $J = 29.2$  Hz), 54.90 (OCH<sub>3</sub>). HRMS  $m/z$  calcd for C<sub>20</sub>H<sub>13</sub>ClF<sub>3</sub>NNaO<sub>4</sub>: 446.0383 [M+Na]<sup>+</sup>; found: 446.0376.

1-(6-chlorocoumarin-3-yl)-1-(4-benzyloxy-1H-indol-3-yl)-2,2,2-trifluoroethanol

(3bd).

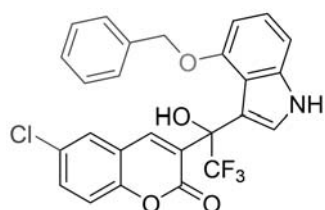

Yield 75%, light yellow powder, mp 256.7-256.9 °C.  $^1\text{H}$  NMR (400 MHz)  $\delta$  11.34 (d,  $J = 1.5$  Hz), 8.08 (s), 7.58 (dd,  $J = 8.8, 2.4$  Hz), 7.43 (d,  $J = 2.3$  Hz), 7.36 (s, OH), 7.32 (d,  $J = 8.8$  Hz), 7.30 – 7.26 (m), 7.24 – 7.16 (m, 4H), 7.07 (s), 7.03 (d,  $J = 8.0$  Hz), 6.96 (t,  $J = 7.9$  Hz), 6.43 (d,  $J = 7.7$  Hz), 5.00 (d,  $J = 12.5$  Hz), 4.85 (d,  $J = 12.5$  Hz).  $^{13}\text{C}$  NMR (101 MHz)  $\delta$  157.75(C=O), 151.68(C–O), 151.45(C–O), 142.49, 138.20, 136.83, 131.75, 128.21 (2C), 128.18, 127.58, 127.41 (2C), 127.17, 125.57 (q,  $J = 288.5$  Hz, C–CF<sub>3</sub>), 123.52, 123.50, 122.34, 119.68, 117.55, 115.39, 110.65, 105.31, 101.40, 74.76 (q,  $J = 29.7$  Hz, C–CF<sub>3</sub>), 69.28 (OCH<sub>2</sub>). HRMS  $m/z$  calcd for C<sub>26</sub>H<sub>16</sub>ClF<sub>3</sub>NO<sub>4</sub>: 498.0720 [M-H]<sup>+</sup>; found: 498.0709.

1-(6-bromocoumarin-3-yl)-1-(1H-indol-3-yl)-2,2,2-trifluoroethanol (3ca).

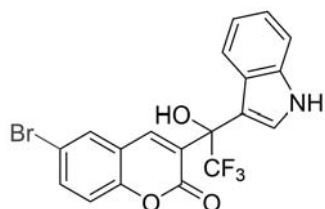

Yield 84%, yellow powder, mp 253.2-255.0 °C.  $^1\text{H}$  NMR (400 MHz)  $\delta$  11.27 (d,  $J = 1.2$  Hz), 8.69 (s), 8.31 (d,  $J = 2.3$  Hz), 7.81 (dd,  $J = 8.8, 2.4$  Hz), 7.43 (s, OH), 7.39 (d,  $J = 8.3$  Hz), 7.38 – 7.34 (m, 2H), 7.31 (d,  $J = 8.1$  Hz), 7.05 (t,  $J = 7.6$  Hz), 6.87 (t,  $J = 7.5$  Hz).  $^{13}\text{C}$  NMR (101 MHz)  $\delta$  156.75 (C=O), 152.56 (C–O), 141.84, 136.22, 135.01,

131.71, 126.48, 125.30 (q,  $J = 288.2$  Hz,  $\text{CF}_3$ ), 125.27, 124.36, 121.24, 120.26, 119.58, 119.10, 118.13, 116.35, 111.84, 110.10, 74.41 (q,  $J = 29.9$  Hz,  $\text{C-CF}_3$ ). HRMS  $m/z$  calcd for  $\text{C}_{19}\text{H}_{10}\text{BrF}_3\text{NO}_3$ : 435.9796  $[\text{M-H}]^+$ ; found: 435.9786.

1-(6-bromocoumarin-3-yl)-1-(4-methoxy-1H-indol-3-yl)-2,2,2-trifluoroethanol (**3cc**).

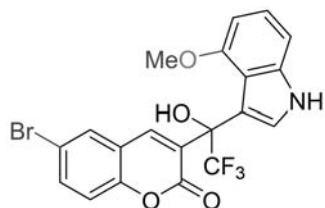

Yield 76%, yellow powder, mp 234.1-235.5 °C.  $^1\text{H}$  NMR (400 MHz)  $\delta$  11.32 (d,  $J = 1.5$  Hz,  $\text{NH}$ ), 8.32 (s), 8.23 (d,  $J = 2.2$  Hz), 7.79 (dd,  $J = 8.8, 2.2$  Hz), 7.39 (d,  $J = 8.8$  Hz), 7.35 (s,  $\text{OH}$ ), 7.05 – 6.99 (m, 3H), 6.39 (dd,  $J = 6.6, 1.5$  Hz), 3.45 (s, 3H,  $\text{OCH}_3$ ).  $^{13}\text{C}$  NMR (101 MHz, DMSO)  $\delta$  158.15 ( $\text{C=O}$ ), 152.33 ( $\text{C-O}$ ), 152.21 ( $\text{C-O}$ ), 141.82, 138.05, 134.78, 131.24, 127.53, 125.58 (q,  $J = 287.5$  Hz), 123.32, 122.51, 120.63, 118.12, 116.44, 115.24, 111.07, 105.31, 100.32, 74.93 (q,  $J = 29.4$  Hz), 54.91 ( $\text{OCH}_3$ ). HRMS  $m/z$  calcd for  $\text{C}_{20}\text{H}_{12}\text{BrF}_3\text{NO}_4$ : 465.9902  $[\text{M-H}]^+$ ; found: 465.9890.

1-(6-bromocoumarin-3-yl)-1-(4-benzyloxy-1H-indol-3-yl)-2,2,2-trifluoroethanol (**3cd**).

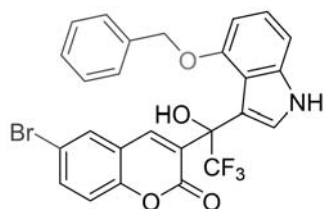

Yield 79%, yellow powder, mp 213.3-215.3 °C.  $^1\text{H}$  NMR (400 MHz)  $\delta$  11.35 (s,  $\text{NH}$ ), 8.06 (s), 7.70 (dd,  $J = 8.8, 2.3$  Hz), 7.53 (d,  $J = 2.2$  Hz), 7.36 (s,  $\text{OH}$ ), 7.32 – 7.16 (m, 6H), 7.07 (d,  $J = 1.4$  Hz), 7.03 (d,  $J = 7.9$  Hz), 6.96 (t,  $J = 7.9$  Hz), 6.43 (d,  $J = 7.7$  Hz), 5.00 (d,  $J = 12.4$  Hz,  $\text{CHH}$ ), 4.84 (d,  $J = 12.4$  Hz,  $\text{CHH}$ ).  $^{13}\text{C}$  NMR (101 MHz)  $\delta$  157.69 ( $\text{C=O}$ ), 152.09 ( $\text{C-O}$ ), 151.46 ( $\text{C-O}$ ), 142.45, 138.20, 136.81, 134.52, 131.14, 128.23(2C), 127.59, 127.48(2C), 127.11, 125.57 (d,  $J = 287.6$  Hz,  $\text{CF}_3$ ), 123.52, 123.49, 122.34, 120.15, 117.82, 116.06, 115.39, 110.64, 105.33, 101.40, , 74.75 (q,  $J = 29.6$  Hz,  $\text{C-CF}_3$ ), 69.33 ( $\text{OCH}_2$ ). HRMS  $m/z$  calcd for  $\text{C}_{26}\text{H}_{16}\text{BrF}_3\text{NO}_4$ : 542.0215  $[\text{M-H}]^+$ ; found: 542.0201.

1-(7-methoxycoumarin-3-yl)-1-(1*H*-indol-3-yl)-2,2,2-trifluoroethanol (**3da**).

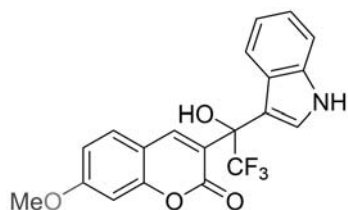

Yield 82%, white powder, mp 186.7-188.4 °C. <sup>1</sup>H NMR (400 MHz) δ 11.27 (d, *J* = 2.1 Hz, *NH*), 8.56 (s), 7.88 (d, *J* = 9.4 Hz), 7.45 (s, *OH*), 7.42 (d, *J* = 8.1 Hz), 7.35 (d, *J* = 8.0 Hz), 7.24 (s), 7.07 (td, *J* = 7.8, 1.0 Hz), 7.01 – 6.97 (m, 2H), 6.88 (t, *J* = 7.5 Hz), 3.85 (s, 3H, *OCH*<sub>3</sub>). <sup>13</sup>C NMR (101 MHz) δ 163.15(*C*=*O*), 157.98(*C*–*O*), 155.52(*C*–*O*), 143.17, 136.29, 130.69, 125.56 (d, *J* = 287.8 Hz, *CF*<sub>3</sub>), 125.42, 124.25, 121.35, 121.24, 119.70, 119.04, 112.93, 111.97, 111.87, 110.67, 100.14, 74.42 (q, *J* = 30.1 Hz, *C*-*CF*<sub>3</sub>), 56.10(*OCH*<sub>3</sub>). HRMS: *m/z* calcd for C<sub>20</sub>H<sub>13</sub>F<sub>3</sub>NO<sub>4</sub>: 388.0797 [*M*-*H*]<sup>+</sup>; found: 388.0790.

1-(7-methoxycoumarin-3-yl)-1-(4-methoxy-1*H*-indol-3-yl)-2,2,2-trifluoroethanol (**3dc**).

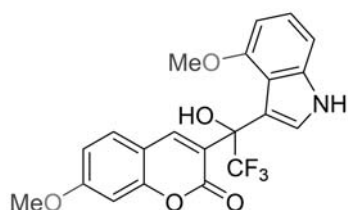

Yield 72%, yellow powder, mp 214.4-215.1 °C. <sup>1</sup>H NMR (400 MHz) δ 11.09 (d, *J* = 1.6 Hz, *NH*), 8.54 (s), 7.90 (d, *J* = 9.3 Hz), 7.36 (s, *OH*), 7.29 (d, *J* = 8.7 Hz), 7.16 (s), 7.03 – 6.98 (m, 2H), 6.76 (d, *J* = 2.0 Hz), 6.72 (dd, *J* = 8.8, 2.3 Hz), 3.86 (s, 3H, *OCH*<sub>3</sub>), 3.50 (s, 3H, *OCH*<sub>3</sub>). <sup>13</sup>C NMR (101 MHz) δ 163.08(*C*=*O*), 157.90(*C*–*O*), 155.40(*C*–*O*), 152.96(*C*–*O*), 142.90, 131.44, 130.62, 125.77, 125.49 (q, *J* = 288.3 Hz, *CF*<sub>3</sub>), 124.88, 121.31, 112.90, 112.38, 111.85, 110.74, 110.18, 102.08, 100.10, 74.46 (q, *J* = 30.2 Hz, *C*-*CF*<sub>3</sub>), 56.09(*OCH*<sub>3</sub>), 55.14(*OCH*<sub>3</sub>). HRMS: *m/z* calcd for C<sub>21</sub>H<sub>15</sub>F<sub>3</sub>NO<sub>5</sub>: 418.0902 [*M*-*H*]<sup>+</sup>; found: 418.0895.

1-(7-methoxycoumarin-3-yl)-1-(4-benzyloxy-1*H*-indol-3-yl)-2,2,2-trifluoroethanol (**3dd**).

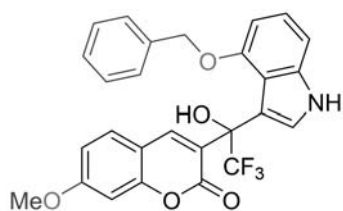

Yield 85%, yellow powder, mp 206.9-208.0 °C. <sup>1</sup>H NMR (400 MHz) δ 11.33 (d, *J* = 1.9 Hz, *NH*), 7.93 (s), 7.42 (d, *J* = 8.7 Hz), 7.36 (s, *OH*), 7.27 – 7.22 (m), 7.21 – 7.13 (m, 4H), 7.09 (s), 7.02 (d, *J* = 8.0 Hz), 6.96 – 6.91 (m, 2H), 6.88 (dd, *J* = 8.7, 2.4 Hz), 6.39 (d, *J* = 7.7 Hz), 5.04 (d, *J* = 12.9 Hz, *OCHH*), 4.93 (d, *J* = 12.9 Hz, *OCHH*), 3.83 (s, 3H, *OCH<sub>3</sub>*). <sup>13</sup>C NMR (101 MHz) δ 162.89 (*C=O*), 159.48 (*C–O*), 155.01(*C–O*), 151.18, 143.61, 138.29, 136.98, 130.22, 128.25(2C), 127.58, 127.19(2C), 125.82 (q, *J* = 292.1 Hz, *CF<sub>3</sub>*), 123.43, 123.41, 122.38, 121.92, 115.33, 112.81, 112.05, 111.21, 105.27, 101.42, 100.02, 75.30 (q, *J* = 29.2 Hz, *C–CF<sub>3</sub>*), 69.10(*OCH<sub>2</sub>*), 56.07(*OCH<sub>3</sub>*). HRMS: *m/z* calcd for C<sub>27</sub>H<sub>19</sub>F<sub>3</sub>NO<sub>5</sub>: 494.1215 [M-H]<sup>+</sup>; found: 494.1206.

1-(7-methoxycoumarin-3-yl)-1-(5-methyl-1*H*-indol-3-yl)-2,2,2-trifluoroethanol (**3de**).

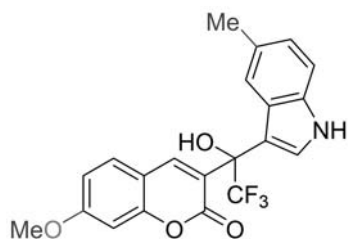

Yield 78%, yellow powder, mp 230.1-231.5 °C. <sup>1</sup>H NMR (400 MHz) δ 11.13 (d, *J* = 2.1 Hz, *NH*), 8.51 (s), 7.88 (d, *J* = 8.9 Hz), 7.38 (s, *OH*), 7.30 (d, *J* = 8.3 Hz), 7.18 (s), 7.17 (s), 7.01 (s), 6.99 (t, *J* = 2.4 Hz), 6.89 (dd, *J* = 8.3, 1.1 Hz), 3.86 (s, 3H, *OCH<sub>3</sub>*), 2.22 (s, 3H, *CH<sub>3</sub>*). <sup>13</sup>C NMR (101 MHz) δ 163.12 (*C=O*), 158.10 (*C–O*), 155.45 (*C–O*), 143.12, 134.65, 130.68, 127.32, 125.66, 125.57 (q, *J* = 287.8 Hz), 124.30, 122.85, 121.27, 119.40, 112.92, 111.95, 111.54, 110.06, 100.15, 74.62 (q, *J* = 29.9 Hz), 56.09 (*OCH<sub>3</sub>*), 21.46 (*CH<sub>3</sub>*). HRMS: *m/z* calcd for C<sub>21</sub>H<sub>15</sub>F<sub>3</sub>NO<sub>4</sub>: 402.0953 [M-H]<sup>+</sup>; found: 402.0946.

1-(7-methoxycoumarin-3-yl)-1-(5-methoxy-1*H*-indol-3-yl)-2,2,2-trifluoroethanol (**3df**).



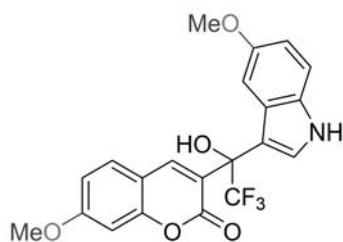

Yield 85%, white powder, mp 218.4-220.6 °C. <sup>1</sup>H NMR (400 MHz) δ 11.30 (d, *J* = 1.7 Hz, *NH*), 8.08 (s), 7.76 (d, *J* = 8.7 Hz), 7.34 (s, *OH*), 7.10 (s), 7.06 – 6.98 (m, 3H), 6.95 (dd, *J* = 8.7, 2.3 Hz), 6.40 (dd, *J* = 6.7, 1.4 Hz), 3.85 (s, 3H, *OCH*<sub>3</sub>), 3.49 (s, 3H, *OCH*<sub>3</sub>). <sup>13</sup>C NMR (101 MHz) δ 162.90 (*C=O*), 159.81 (*C–O*), 154.96 (*C–O*), 152.40 (*C–O*), 143.23, 138.11, 130.24, 125.77 (q, *J* = 288.1 Hz, *CF*<sub>3</sub>), 123.11, 122.55, 122.12, 115.25, 113.00, 112.22, 111.58, 105.26, 100.38, 100.13, 75.24 (q, *J* = 29.2 Hz, *C–CF*<sub>3</sub>), 56.07(*OCH*<sub>3</sub>), 54.97(*OCH*<sub>3</sub>). HRMS: *m/z* calcd for C<sub>21</sub>H<sub>15</sub>F<sub>3</sub>NO<sub>5</sub>: 418.0902 [*M–H*]<sup>+</sup>; found: 418.0893.

1-(8-methoxycoumarin-3-yl)-1-(1*H*-indol-3-yl)-2,2,2-trifluoroethanol (**3ea**).

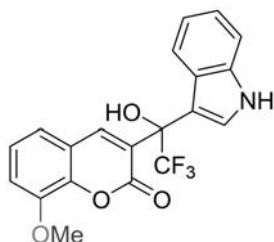

Yield 84%, white powder, mp 244.3-247.2 °C. <sup>1</sup>H NMR (400 MHz) δ 11.28 (d, *J* = 1.8 Hz, *NH*), 8.64 (s), 7.53 (m), 7.46 (s, *OH*), 7.42 (d, *J* = 8.1 Hz), 7.36 – 7.31 (m, 4H), 7.06 (t, *J* = 7.3 Hz), 6.88 (t, *J* = 7.3 Hz), 3.89 (s, 3H, *OCH*<sub>3</sub>). <sup>13</sup>C NMR (101 MHz) δ 157.13 (*C=O*), 146.24 (*C–O*), 143.22 (*C–O*), 142.87, 136.26, 125.49, 125.43 (q, *J* = 288.2 Hz, *C–CF*<sub>3</sub>), 125.34, 124.75, 124.35, 121.26, 120.67, 119.56, 119.10, 118.95, 114.77, 111.88, 110.32, 74.39 (q, *J* = 30.0 Hz, *C–CF*<sub>3</sub>), 56.17 (*OCH*<sub>3</sub>). HRMS: *m/z* calcd for C<sub>20</sub>H<sub>13</sub>F<sub>3</sub>NO<sub>4</sub>: 388.0797 [*M–H*]<sup>+</sup>; found: 388.0794.

1-(8-methoxycoumarin-3-yl)-1-(2-methyl-1*H*-indol-3-yl)-2,2,2-trifluoroethanol (**3eb**).

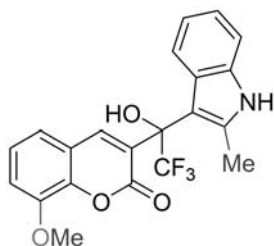

Yield 72%, yellow powder, mp 200.8-203.4 °C. <sup>1</sup>H NMR (400 MHz) δ 11.08 (s, NH), 8.38 (s), 7.60 – 7.54 (m), 7.38 – 7.34 (m, 2H), 7.28 (d, *J* = 8.1 Hz), 7.24 (d, *J* = 8.0 Hz), 6.98 – 6.91 (m, 2H), 6.79 (t, *J* = 7.6 Hz), 3.89 (s, 3H, CH<sub>3</sub>), 2.39 (s, 3H, CH<sub>3</sub>). <sup>13</sup>C NMR (101 MHz) δ 156.86(C=O), 146.18(C–O), 142.54, 140.36, 134.80, 134.50, 126.97, 126.27, 125.86 (q, *J* = 287.5 Hz, CF<sub>3</sub>), 124.77, 120.80, 119.94, 119.28, 118.71, 118.59, 114.76, 110.60, 105.85, 75.93 (q, *J* = 29.5 Hz, C–CF<sub>3</sub>), 56.14 (OCH<sub>3</sub>), 14.15 (CH<sub>3</sub>). HRMS: *m/z* calcd for C<sub>21</sub>H<sub>15</sub>F<sub>3</sub>NO<sub>4</sub>: 402.0953 [M–H]<sup>+</sup>; found: 402.0948.

1-(8-methoxycoumarin-3-yl)-1-(4-methoxy-1*H*-indol-3-yl)-2,2,2-trifluoroethanol  
(**3ec**).

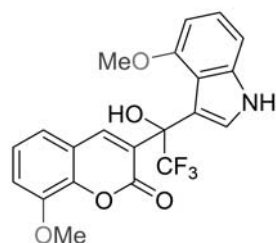

Yield 80%, light-yellow powder, mp 245.6-247.1 °C. <sup>1</sup>H NMR (400 MHz) δ 11.31 (d, *J* = 1.8 Hz, NH), 8.19 (s), 7.41 (dd, *J* = 6.9, 2.1 Hz), 7.35 (s, OH), 7.34 – 7.27 (m, 2H), 7.10 (s), 7.04 – 6.98 (m, 2H), 6.39 (dd, *J* = 6.8, 1.4 Hz), 3.90 (s, 3H, CH<sub>3</sub>), 3.45 (s, 3H, CH<sub>3</sub>). <sup>13</sup>C NMR (101 MHz) δ 158.85 (C=O), 152.36 (C–O), 146.19, 143.23, 142.38, 138.07, 126.24, 125.65 (d, *J* = 288.4 Hz, CF<sub>3</sub>), 124.81, 123.20, 122.54, 120.21, 119.26, 115.23, 114.57, 111.28, 105.28, 100.37, 75.13 (q, *J* = 28.8 Hz, C–CF<sub>3</sub>), 56.16 (OCH<sub>3</sub>), 54.91 (OCH<sub>3</sub>). HRMS: *m/z* calcd for C<sub>21</sub>H<sub>15</sub>F<sub>3</sub>NO<sub>5</sub>: 418.0902 [M–H]<sup>+</sup>; found: 418.0897.

1-(8-methoxycoumarin-3-yl)-1-(4-benzyloxy-1*H*-indol-3-yl)-2,2,2-trifluoroethanol  
(**3ed**).

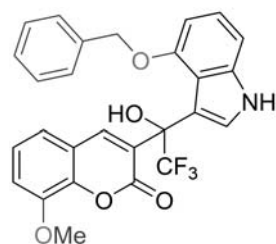

Yield 80%, cyan gray powder, mp 232.3-233.4 °C. <sup>1</sup>H NMR (400 MHz) δ 11.35 (s, NH), 8.03 (s), 7.37 (s, OH), 7.29 – 7.11 (m, 8H), 7.05 (d, *J* = 7.3 Hz), 7.02 (dd, *J* =

8.2, 1.9 Hz), 6.93 (t,  $J = 7.8$  Hz), 6.37 (d,  $J = 7.7$  Hz), 5.02 (d,  $J = 13.0$  Hz, CHH), 4.90 (d,  $J = 13.0$  Hz, CHH), 3.86 (s, 3H, CH<sub>3</sub>). <sup>13</sup>C NMR (101 MHz)  $\delta$  158.69 (C=O), 151.19 (C–O), 146.16 (C–O), 143.70, 142.45, 138.29, 136.95, 128.19 (2C), 127.55, 127.10 (2C), 126.03, 125.68 (q,  $J=288.0$  Hz, CF<sub>3</sub>), 124.57, 123.55, 122.41, 120.22, 119.05, 115.35, 114.52, 110.99, 105.31, 101.46, 75.28 (q,  $J= 29.0$  Hz, C-CF<sub>3</sub>), 69.10(OCH<sub>2</sub>), 56.12 (OCH<sub>3</sub>). HRMS:  $m/z$  calcd for C<sub>27</sub>H<sub>19</sub>F<sub>3</sub>NO<sub>5</sub>: 494.1215 [M-H]<sup>+</sup>; found: 494.1206.

1-(8-methoxycoumarin-3-yl)-1-(5-methyl-1*H*-indol-3-yl)-2,2,2-trifluoroethanol (**3ee**).

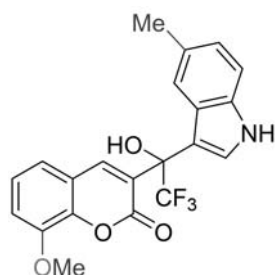

Yield 89%, light-yellow powder, mp 254.1-255.3 °C. <sup>1</sup>H NMR (400 MHz)  $\delta$  11.13 (d,  $J = 1.7$  Hz, NH), 8.58 (s), 7.56 – 7.50 (m), 7.36 (s, OH), 7.35 (s), 7.34 (s), 7.28 (d,  $J = 8.3$  Hz), 7.24 (s), 7.12 (s), 6.88 (d,  $J = 8.3$  Hz), 3.89 (s, 3H, OCH<sub>3</sub>), 2.21 (s, 3H, CH<sub>3</sub>). <sup>13</sup>C NMR (101 MHz)  $\delta$  157.20 (C=O), 146.19 (C-O), 143.08, 142.78, 134.59, 127.32, 125.55, 125.39 (q,  $J= 287.1$  Hz, CF<sub>3</sub>) 125.36, 124.74, 124.34, 122.82, 120.63, 119.25, 118.90, 114.80, 111.51, 109.69, 74.57 (q,  $J= 30.0$  Hz, C-CF<sub>3</sub>), 56.17 (OCH<sub>3</sub>), 21.43 (CH<sub>3</sub>). HRMS:  $m/z$  calcd for C<sub>21</sub>H<sub>15</sub>F<sub>3</sub>NO<sub>4</sub>: 402.0953 [M-H]<sup>+</sup>; found: 402.0950.

1-(8-methoxycoumarin-3-yl)-1-(5-methoxy-1*H*-indol-3-yl)-2,2,2-trifluoroethanol (**3ef**).

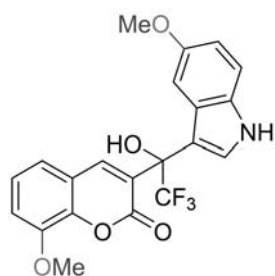

Yield 87%, light-yellow powder, mp 235.5-237.8 °C. <sup>1</sup>H NMR (400 MHz)  $\delta$  11.11(d,  $J=1.7$  Hz, NH), 8.61(s), 7.53 (m), 7.38 (s, OH), 7.35 (s), 7.34 (s), 7.29 (d,  $J=8.7$  Hz), 7.25 (s), 6.75 (d,  $J = 2.0$  Hz), 6.72 (dd,  $J = 8.7, 2.3$  Hz), 3.89 (s, 3H, OCH<sub>3</sub>), 3.50 (s, 3H, OCH<sub>3</sub>). <sup>13</sup>C NMR (101 MHz)  $\delta$  157.13 (C=O), 152.99 (C-O), 146.18, 142.94, 142.77, 131.44, 125.71, 125.43, 125.37 (q,  $J=288.9$  Hz, CF<sub>3</sub>), 124.99, 124.76, 120.58,

118.86, 114.81, 112.41, 110.73, 109.85, 102.04, 74.51 (q,  $J=30.2$  Hz, C-CF<sub>3</sub>), 56.18 (OCH<sub>3</sub>), 55.13 (OCH<sub>3</sub>). HRMS:  $m/z$  calcd for C<sub>21</sub>H<sub>15</sub>F<sub>3</sub>NO<sub>5</sub>: 418.0902 [M-H]<sup>+</sup>; found: 402.0899.

1-(8-methoxycoumarin-3-yl)-1-(6-bromo-1*H*-indol-3-yl)-2,2,2-trifluoroethanol (**3eh**).

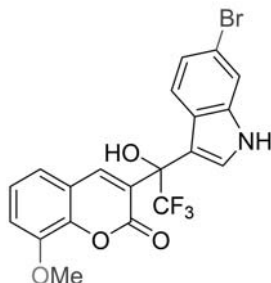

Yield 85%, white powder, mp 164.2~165.7 °C. <sup>1</sup>H NMR (400 MHz) δ 11.39 (s), 8.60 (s), 7.59 (d,  $J = 1.6$  Hz), 7.55 – 7.49 (m), 7.47 (s, OH), 7.37 (s), 7.35 (s), 7.34 (s), 7.27 (d,  $J = 8.6$  Hz), 7.03 (dd,  $J = 8.6, 1.8$  Hz), 3.89 (s, 3H). <sup>13</sup>C NMR (101 MHz) δ 157.02, 146.22, 143.29, 142.86, 137.10, 125.38, 125.27 (q,  $J = 287.9$  Hz), 125.14, 124.75, 124.42, 122.00, 121.27, 120.70, 118.87, 114.88, 114.36, 114.02, 110.76, 74.17 (q,  $J = 29.9$  Hz), 56.19 (OCH<sub>3</sub>). HRMS:  $m/z$  calcd for C<sub>20</sub>H<sub>13</sub>BrF<sub>3</sub>NNaO<sub>4</sub>: 489.9878 [M+Na]<sup>+</sup>; found: 489.9870.

1-(benzo[*f*]coumarin-3-yl)-1-(1*H*-indol-3-yl)-2,2,2-trifluoroethanol (**3fa**).

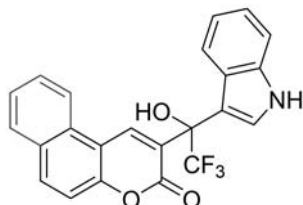

Yield 84%, light-yellow powder, mp 276.3-276.8 °C. <sup>1</sup>H NMR (400 MHz) δ 11.29 (s, NH), 9.34 (s), 8.54 (d,  $J = 8.4$  Hz), 8.26 (d,  $J = 9.1$  Hz), 8.12 (d,  $J = 8.1$  Hz), 7.83 (t,  $J = 7.6$  Hz), 7.69 (t,  $J = 7.5$  Hz), 7.58 (d,  $J = 9.0$  Hz), 7.49 (s, OH), 7.47 (s), 7.41 (d,  $J = 8.1$  Hz), 7.35 (d,  $J = 8.1$  Hz), 7.04 (t,  $J = 7.5$  Hz), 6.84 (t,  $J = 7.5$  Hz). <sup>13</sup>C NMR (101 MHz) δ 157.20 (C=O), 153.55 (C-O), 138.16, 136.18, 134.12, 130.03, 129.19, 128.93, 128.91, 126.37, 125.45 (q,  $J = 288.7$  Hz, CF<sub>3</sub>), 125.35, 124.67, 124.34, 121.91, 121.21, 119.60, 119.06, 116.38, 112.08, 111.80, 110.22, 74.42 (q,  $J = 30.2$  Hz, C-CF<sub>3</sub>). HRMS:  $m/z$  calcd for C<sub>23</sub>H<sub>13</sub>F<sub>3</sub>NO<sub>3</sub>: 408.0848 [M-H]<sup>+</sup>; found: 408.0838.

## 2. NMR Spectra for compounds 3aa-3fa

### Contents of NMR Data

|                                                                                       |     |
|---------------------------------------------------------------------------------------|-----|
| Figure S1. $^1\text{H}$ NMR of 3aa.....                                               | S19 |
| Figure S2. $^1\text{H}$ NMR of 3aa- $d_2$ (3aa changed by $\text{D}_2\text{O}$ )..... | S19 |
| Figure S3. Comparison of $^1\text{H}$ NMR between 3aa and 3aa- $d_2$ .....            | S20 |
| Figure S4. $^{13}\text{C}$ NMR of 3aa.....                                            | S20 |
| Figure S5. $^{19}\text{F}$ NMR of 3aa.....                                            | S21 |
| Figure S6. $^1\text{H}$ - $^{13}\text{C}$ COSY Spectrum of 3aa (Full Spectrum).....   | S21 |
| Figure S7. $^1\text{H}$ - $^{13}\text{C}$ COSY Spectrum of 3aa (Details).....         | S22 |
| Figure S8. $^1\text{H}$ NMR of 3ab.....                                               | S23 |
| Figure S9. $^{13}\text{C}$ NMR of 3ab.....                                            | S23 |
| Figure S10. $^1\text{H}$ NMR of 3ac.....                                              | S24 |
| Figure S11. $^{13}\text{C}$ NMR of 3ac.....                                           | S24 |
| Figure S12. $^1\text{H}$ NMR of 3ad.....                                              | S25 |
| Figure S13. $^{13}\text{C}$ NMR of 3ad.....                                           | S25 |
| Figure S14. $^1\text{H}$ NMR of 3ae.....                                              | S26 |
| Figure S15. $^{13}\text{C}$ NMR of 3ae.....                                           | S26 |
| Figure S16. $^1\text{H}$ NMR of 3af.....                                              | S27 |
| Figure S17. $^{13}\text{C}$ NMR of 3af.....                                           | S27 |
| Figure S18. $^1\text{H}$ NMR of 3ag.....                                              | S28 |
| Figure S19. $^{13}\text{C}$ NMR of 3ag.....                                           | S28 |
| Figure S20. $^1\text{H}$ NMR of 3ah.....                                              | S29 |
| Figure S21. $^{13}\text{C}$ NMR of 3ah.....                                           | S29 |
| Figure S22. $^1\text{H}$ NMR of 3ba.....                                              | S30 |
| Figure S23. $^{13}\text{C}$ NMR of 3ba.....                                           | S30 |
| Figure S24. $^1\text{H}$ NMR of 3bc.....                                              | S31 |
| Figure S25. $^{13}\text{C}$ NMR of 3bc.....                                           | S31 |
| Figure S26. $^1\text{H}$ NMR of 3bd.....                                              | S32 |
| Figure S27. $^{13}\text{C}$ NMR of 3bd.....                                           | S32 |
| Figure S28. $^1\text{H}$ NMR of 3ca.....                                              | S33 |

|                                             |     |
|---------------------------------------------|-----|
| Figure S29. $^{13}\text{C}$ NMR of 3ca..... | S33 |
| Figure S30. $^1\text{H}$ NMR of 3cc.....    | S34 |
| Figure S31. $^{13}\text{C}$ NMR of 3cc..... | S34 |
| Figure S32. $^1\text{H}$ NMR of 3cd.....    | S35 |
| Figure S33. $^{13}\text{C}$ NMR of 3cd..... | S35 |
| Figure S34. $^1\text{H}$ NMR of 3da.....    | S36 |
| Figure S35. $^{13}\text{C}$ NMR of 3da..... | S36 |
| Figure S36. $^1\text{H}$ NMR of 3dc.....    | S37 |
| Figure S37. $^{13}\text{C}$ NMR of 3dc..... | S37 |
| Figure S38. $^1\text{H}$ NMR of 3dd.....    | S38 |
| Figure S39. $^{13}\text{C}$ NMR of 3dd..... | S38 |
| Figure S40. $^1\text{H}$ NMR of 3de.....    | S39 |
| Figure S41. $^{13}\text{C}$ NMR of 3de..... | S39 |
| Figure S42. $^1\text{H}$ NMR of 3df.....    | S40 |
| Figure S43. $^{13}\text{C}$ NMR of 3df..... | S40 |
| Figure S44. $^1\text{H}$ NMR of 3ea.....    | S41 |
| Figure S45. $^{13}\text{C}$ NMR of 3ea..... | S41 |
| Figure S46. $^1\text{H}$ NMR of 3eb.....    | S42 |
| Figure S47. $^{13}\text{C}$ NMR of 3eb..... | S42 |
| Figure S48. $^1\text{H}$ NMR of 3ec.....    | S43 |
| Figure S49. $^{13}\text{C}$ NMR of 3ec..... | S43 |
| Figure S50. $^1\text{H}$ NMR of 3ed.....    | S44 |
| Figure S51. $^{13}\text{C}$ NMR of 3ed..... | S44 |
| Figure S52. $^1\text{H}$ NMR of 3ee.....    | S45 |
| Figure S53. $^{13}\text{C}$ NMR of 3ee..... | S45 |
| Figure S54. $^1\text{H}$ NMR of 3ef.....    | S46 |
| Figure S55. $^{13}\text{C}$ NMR of 3ef..... | S46 |
| Figure S56. $^1\text{H}$ NMR of 3eh.....    | S47 |
| Figure S57. $^{13}\text{C}$ NMR of 3eh..... | S47 |
| Figure S58. $^1\text{H}$ NMR of 3fa.....    | S48 |
| Figure S59. $^{13}\text{C}$ NMR of 3fa..... | S48 |

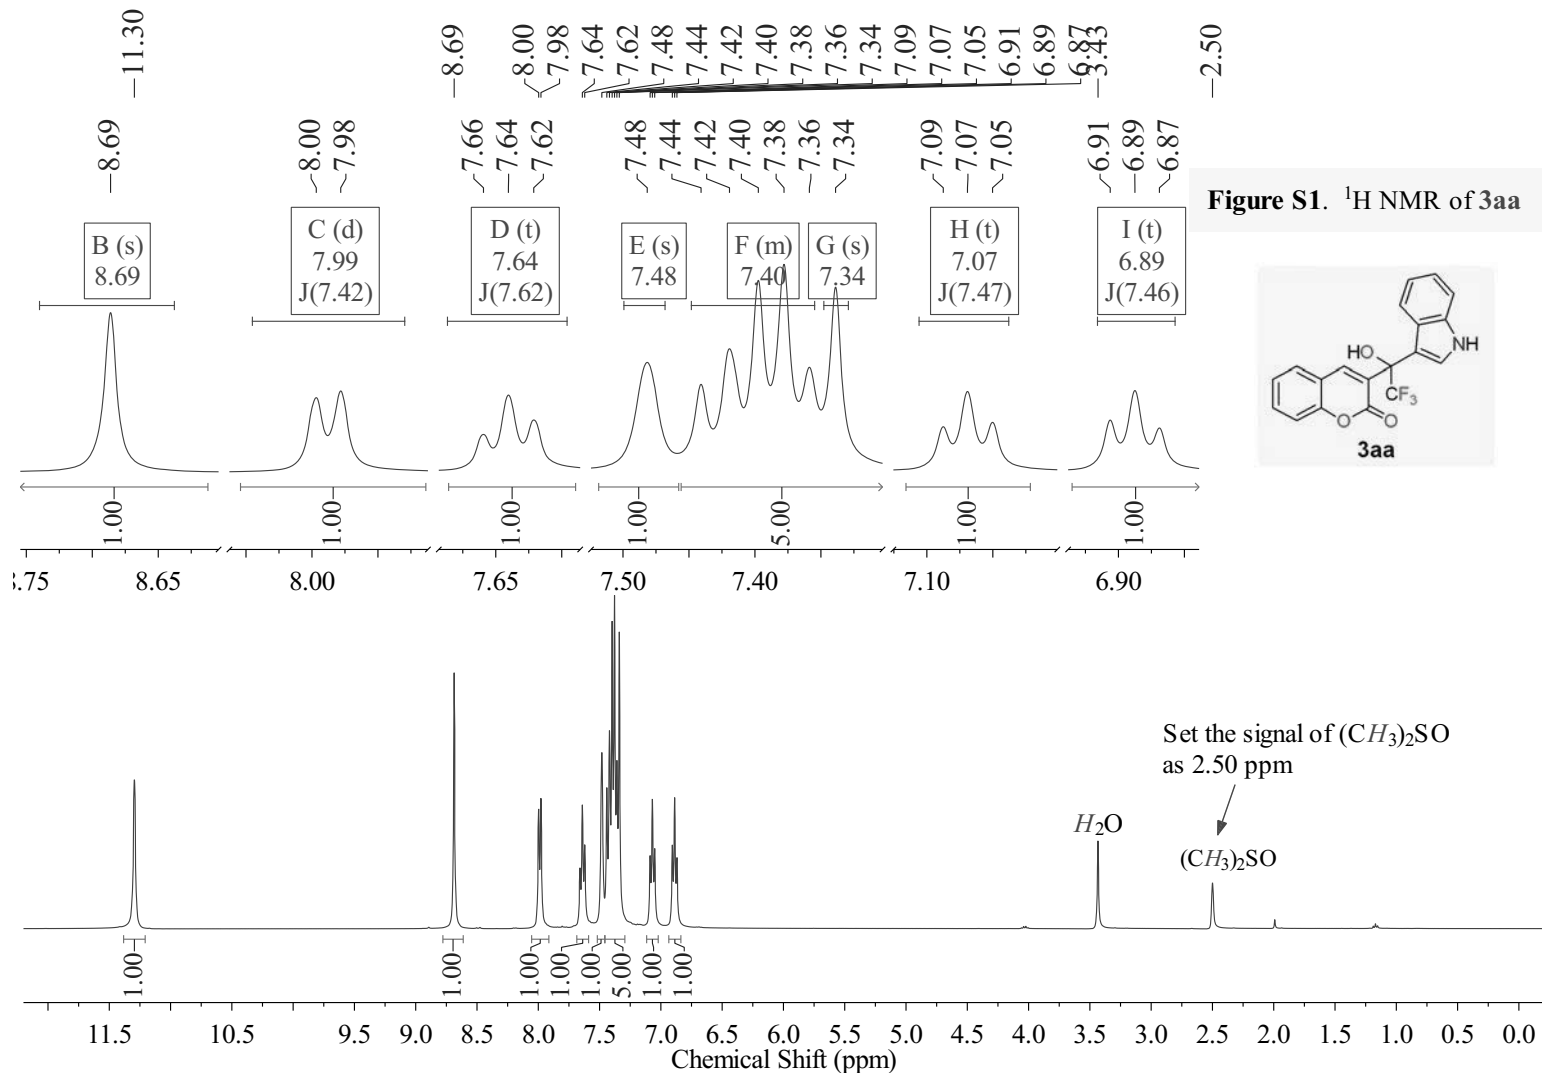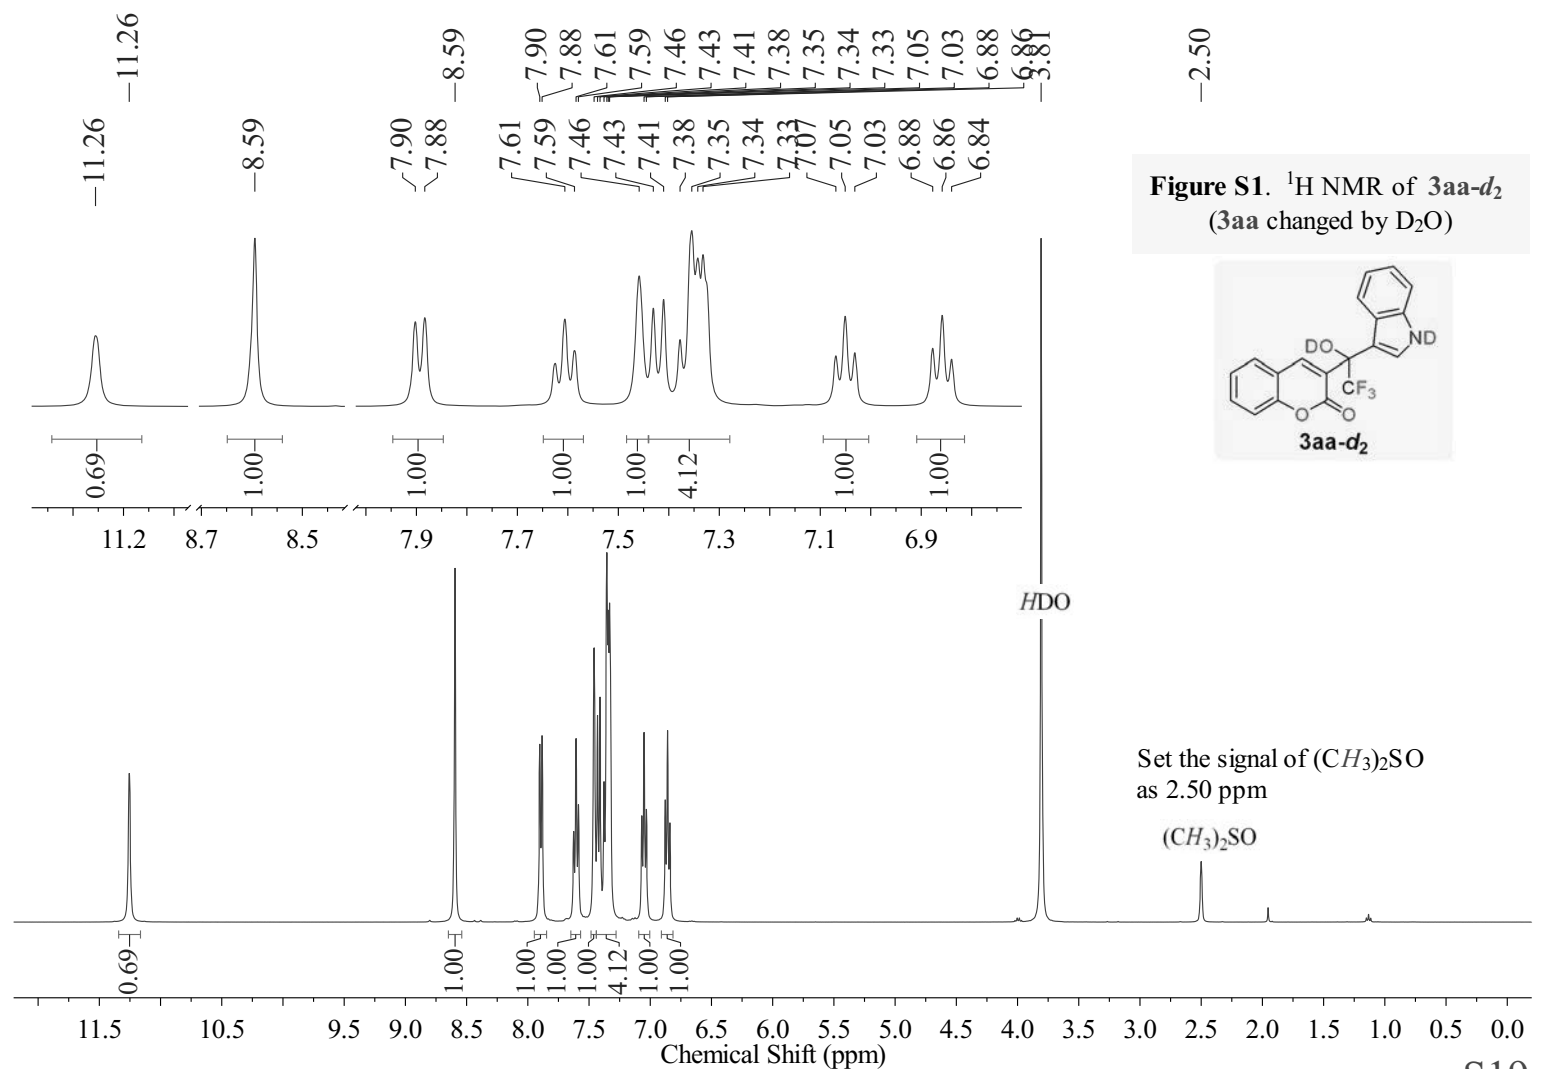

Figure S3. Comparison of  $^1\text{H}$  NMR between 3aa and 3aa- $d_2$

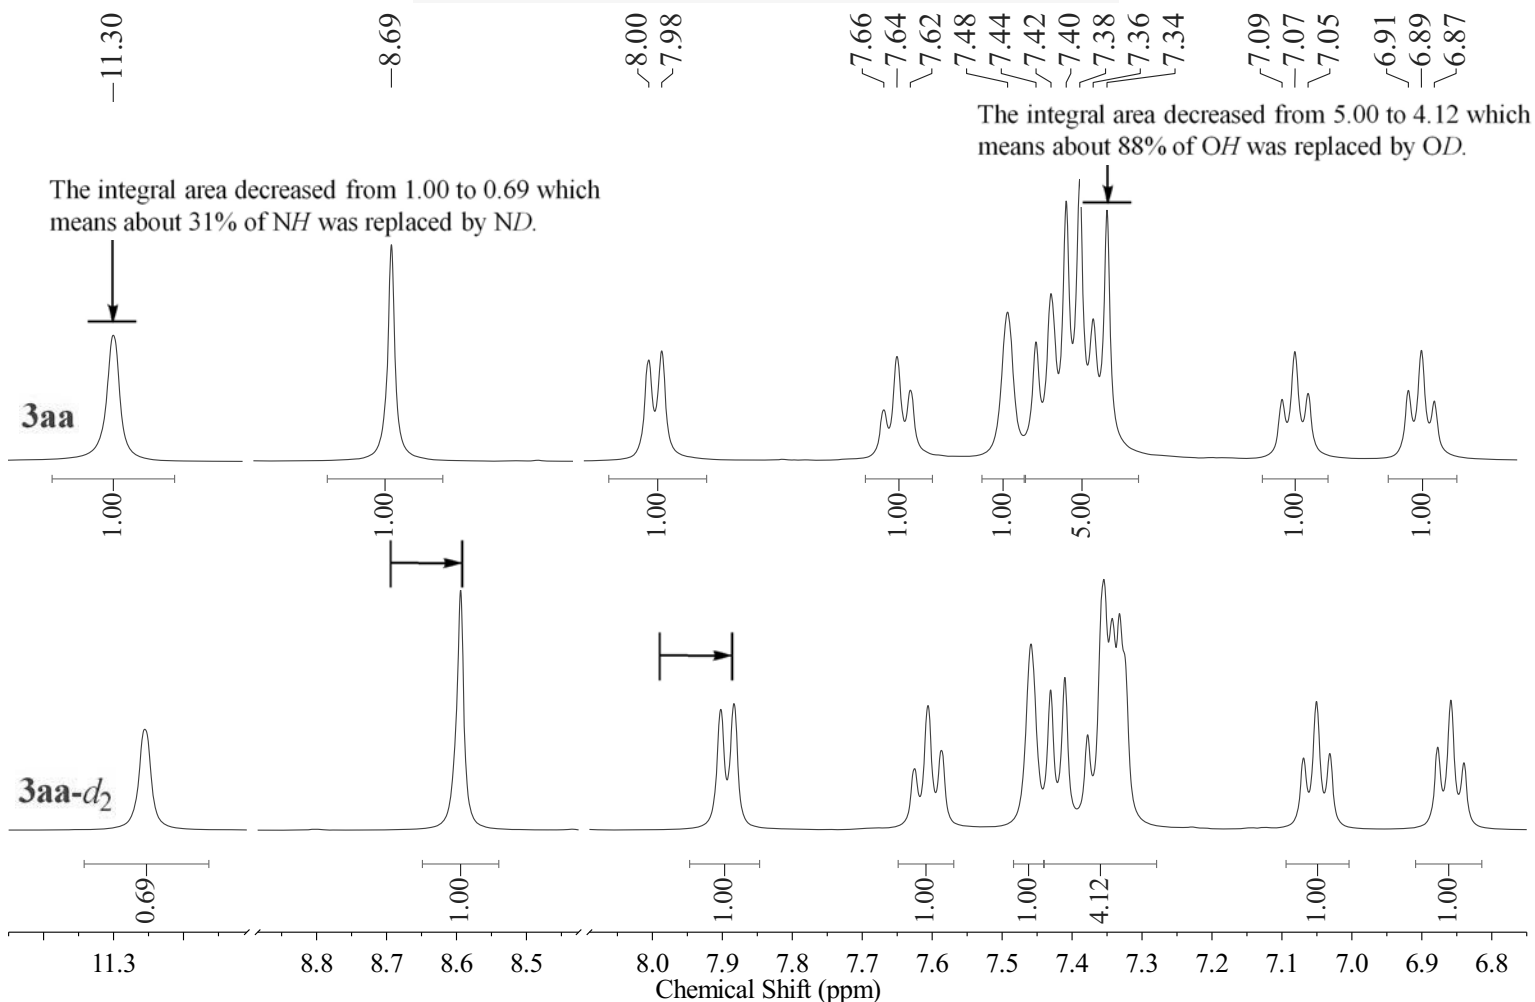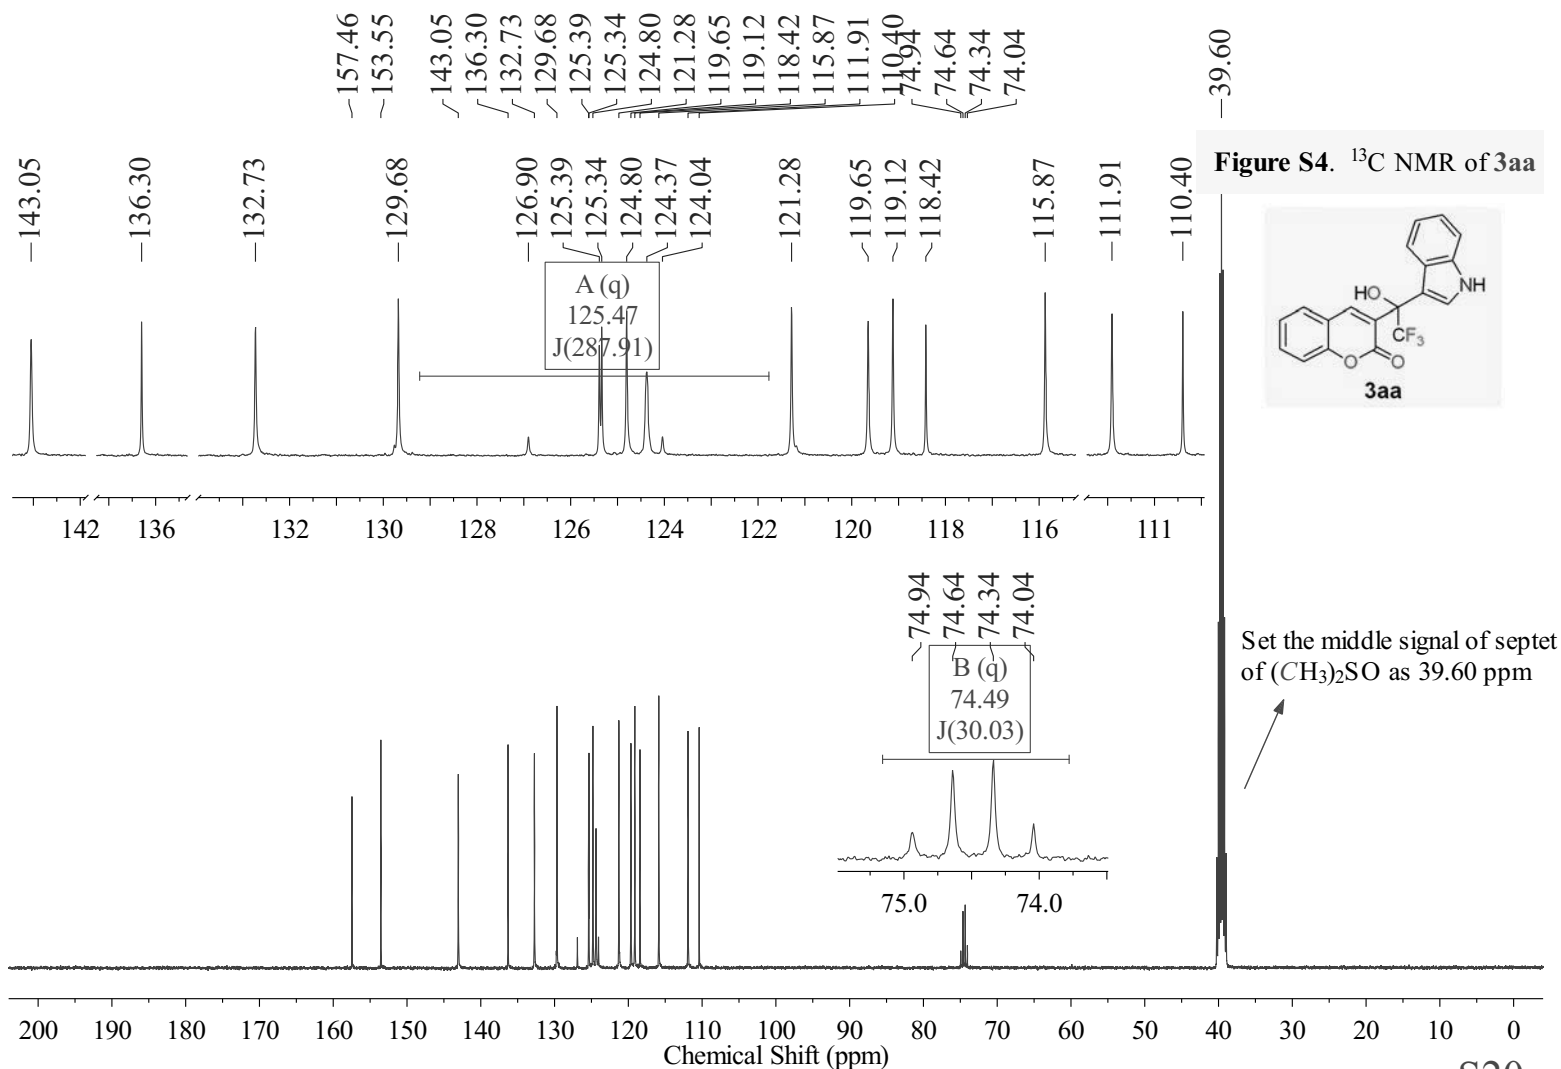

Figure S4.  $^{13}\text{C}$  NMR of 3aa

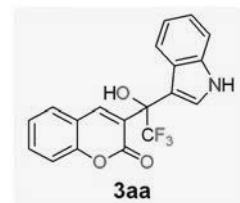



Figure S5.  $^{19}\text{F}$  NMR of 3aa

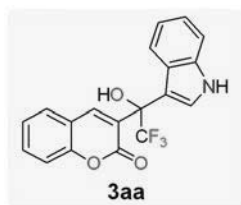

--74.21

The chemical shift was obtained from the MestReNova software without correction.

0 -10 -20 -30 -40 -50 -60 -70 -80 -90 -100 -110 -120 -130 -140 -150 -160 -170 -180 -190 -200  
Chemical Shift (ppm)

Figure S6.  $^1\text{H}$ - $^{13}\text{C}$  COSY Spectrum of 3aa (Full Spectrum)

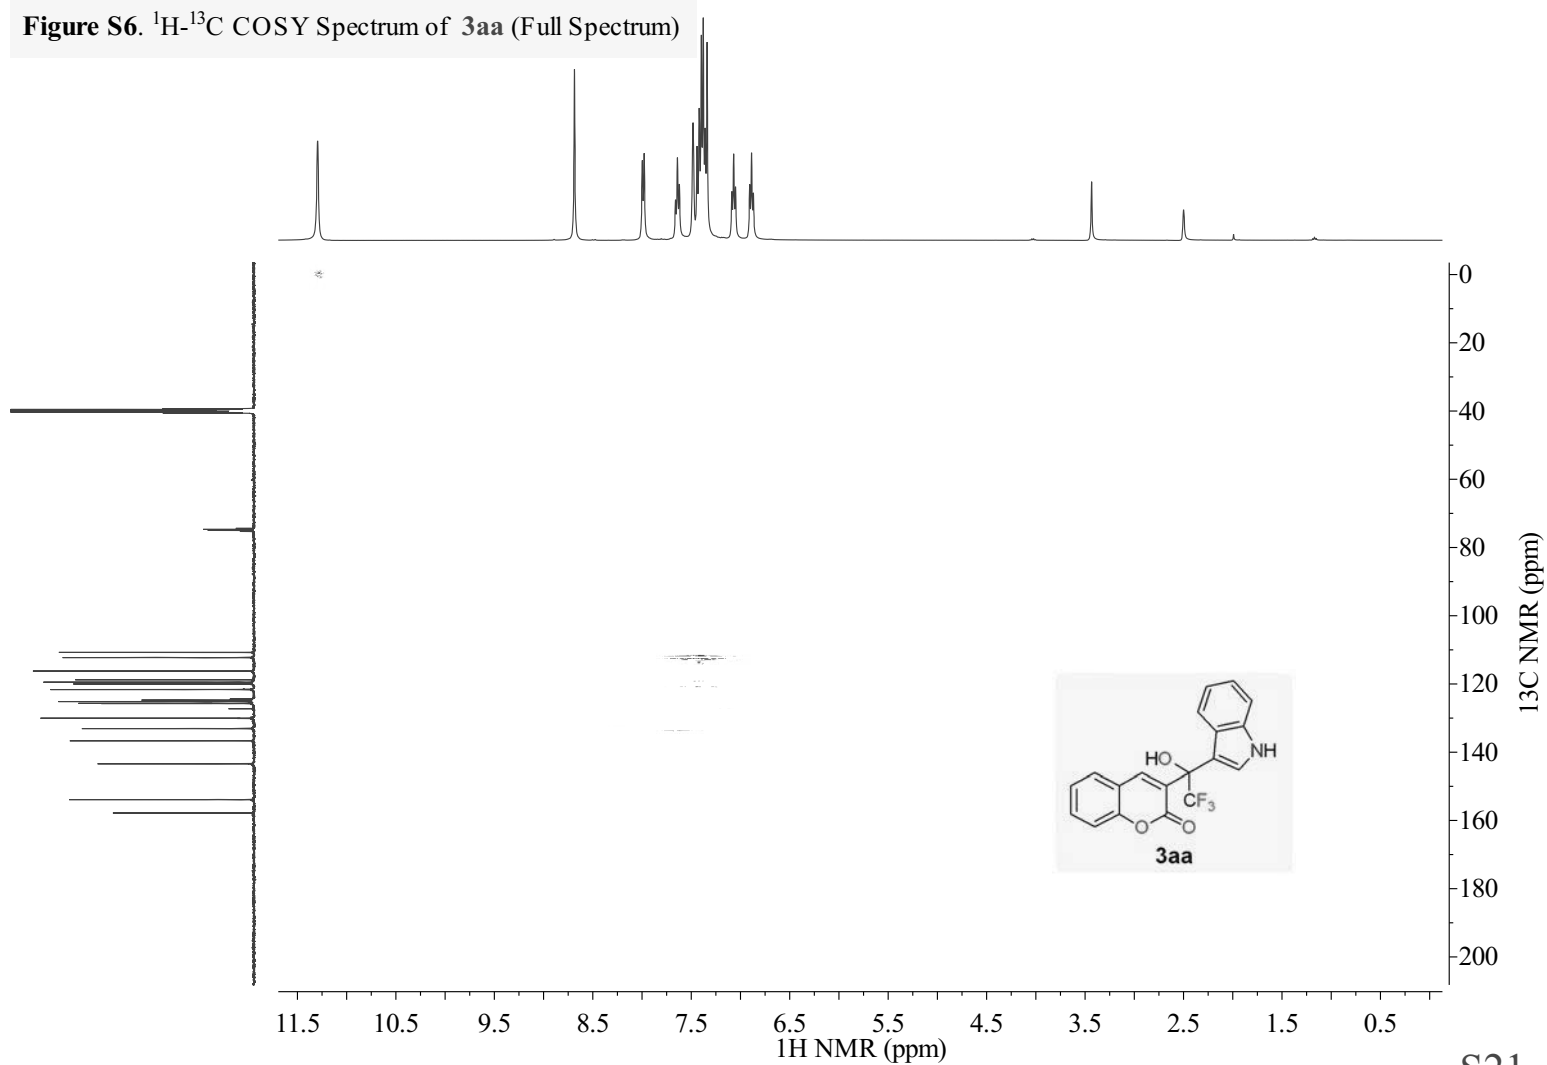

Figure S7.  $^1\text{H}$ - $^{13}\text{C}$  COSY Spectrum of **3aa** (Details)

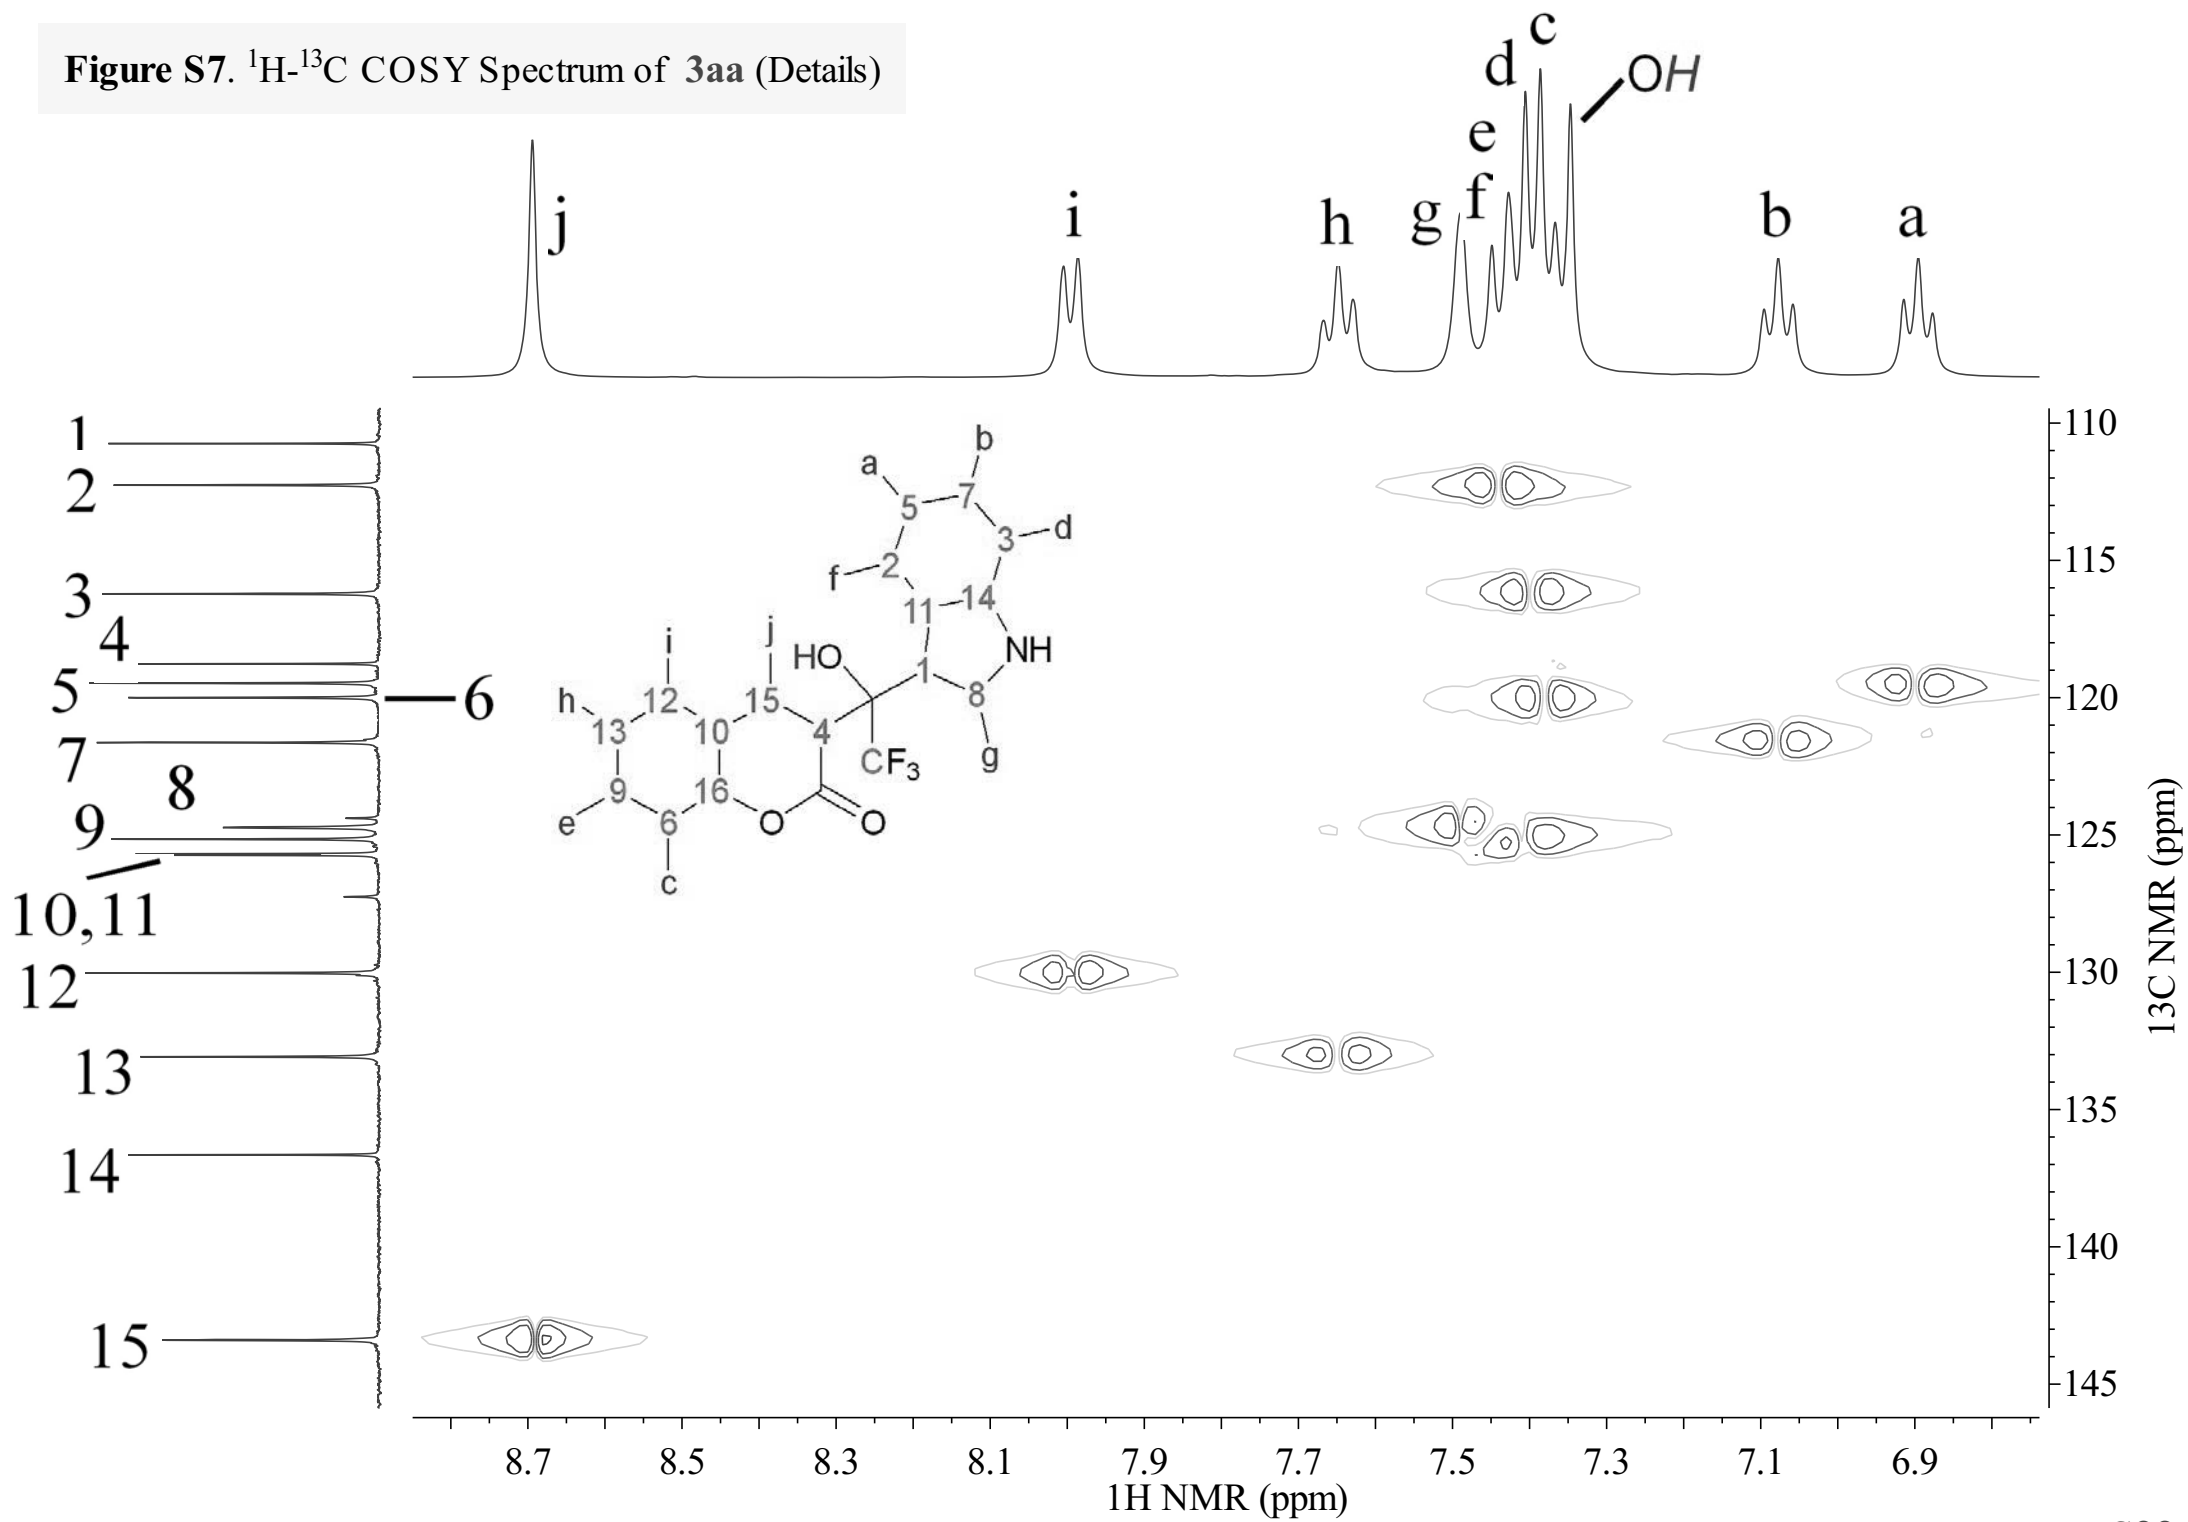

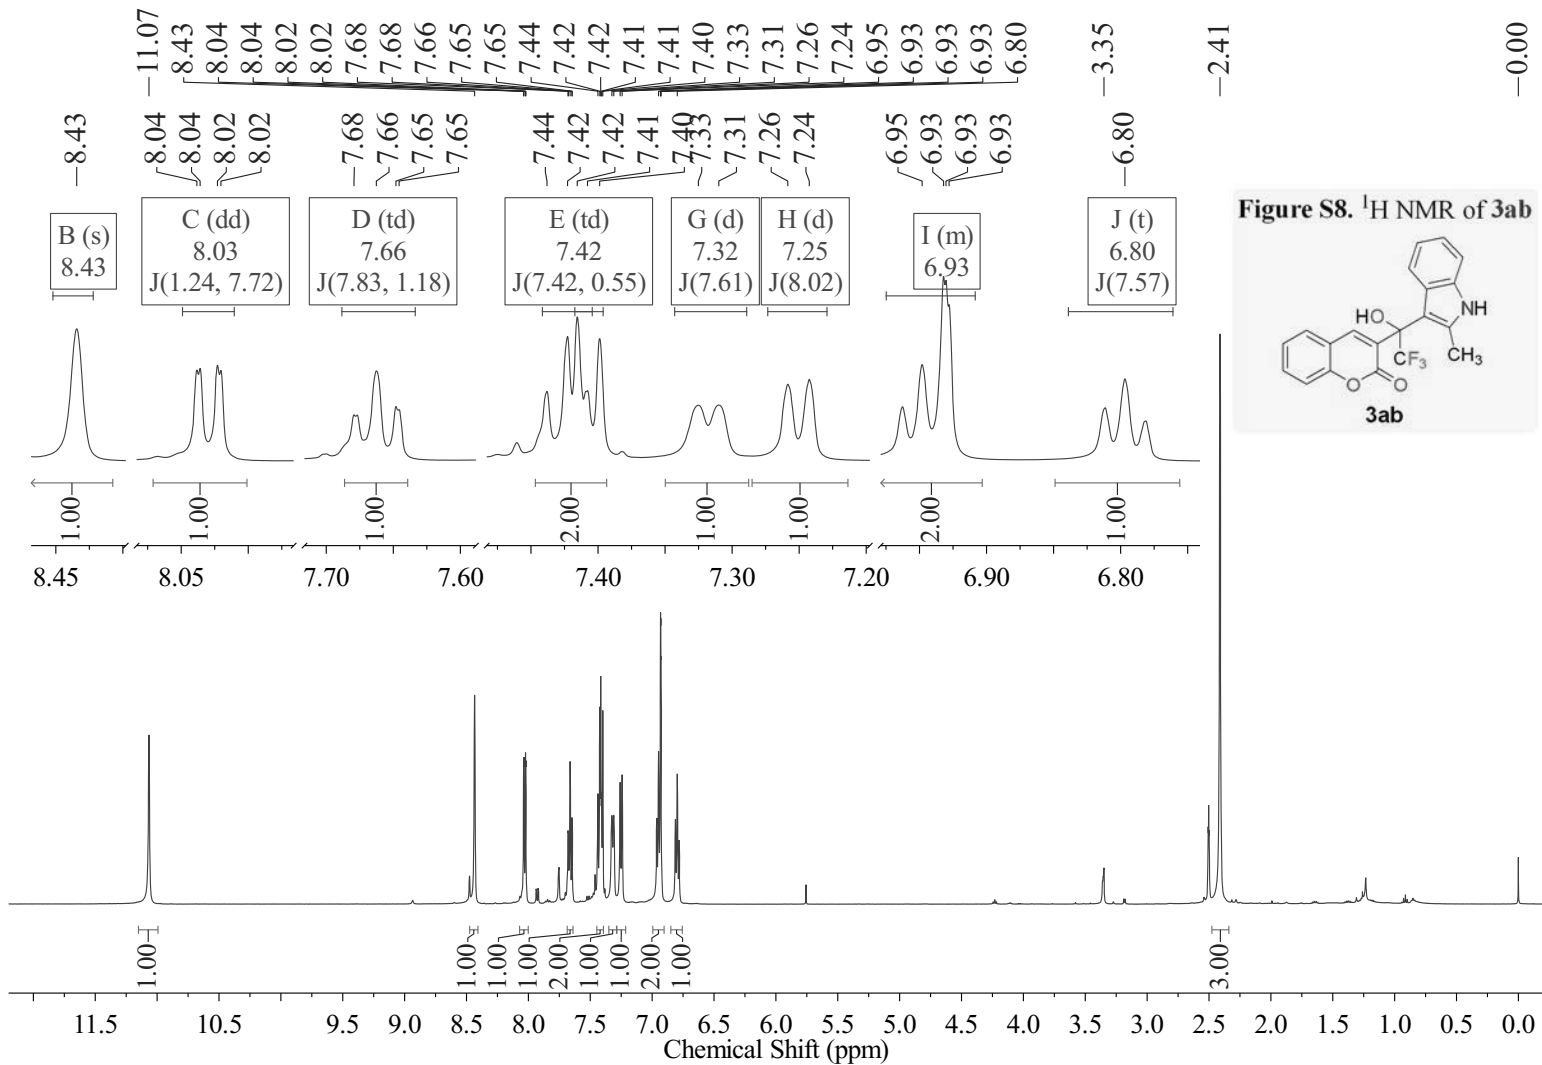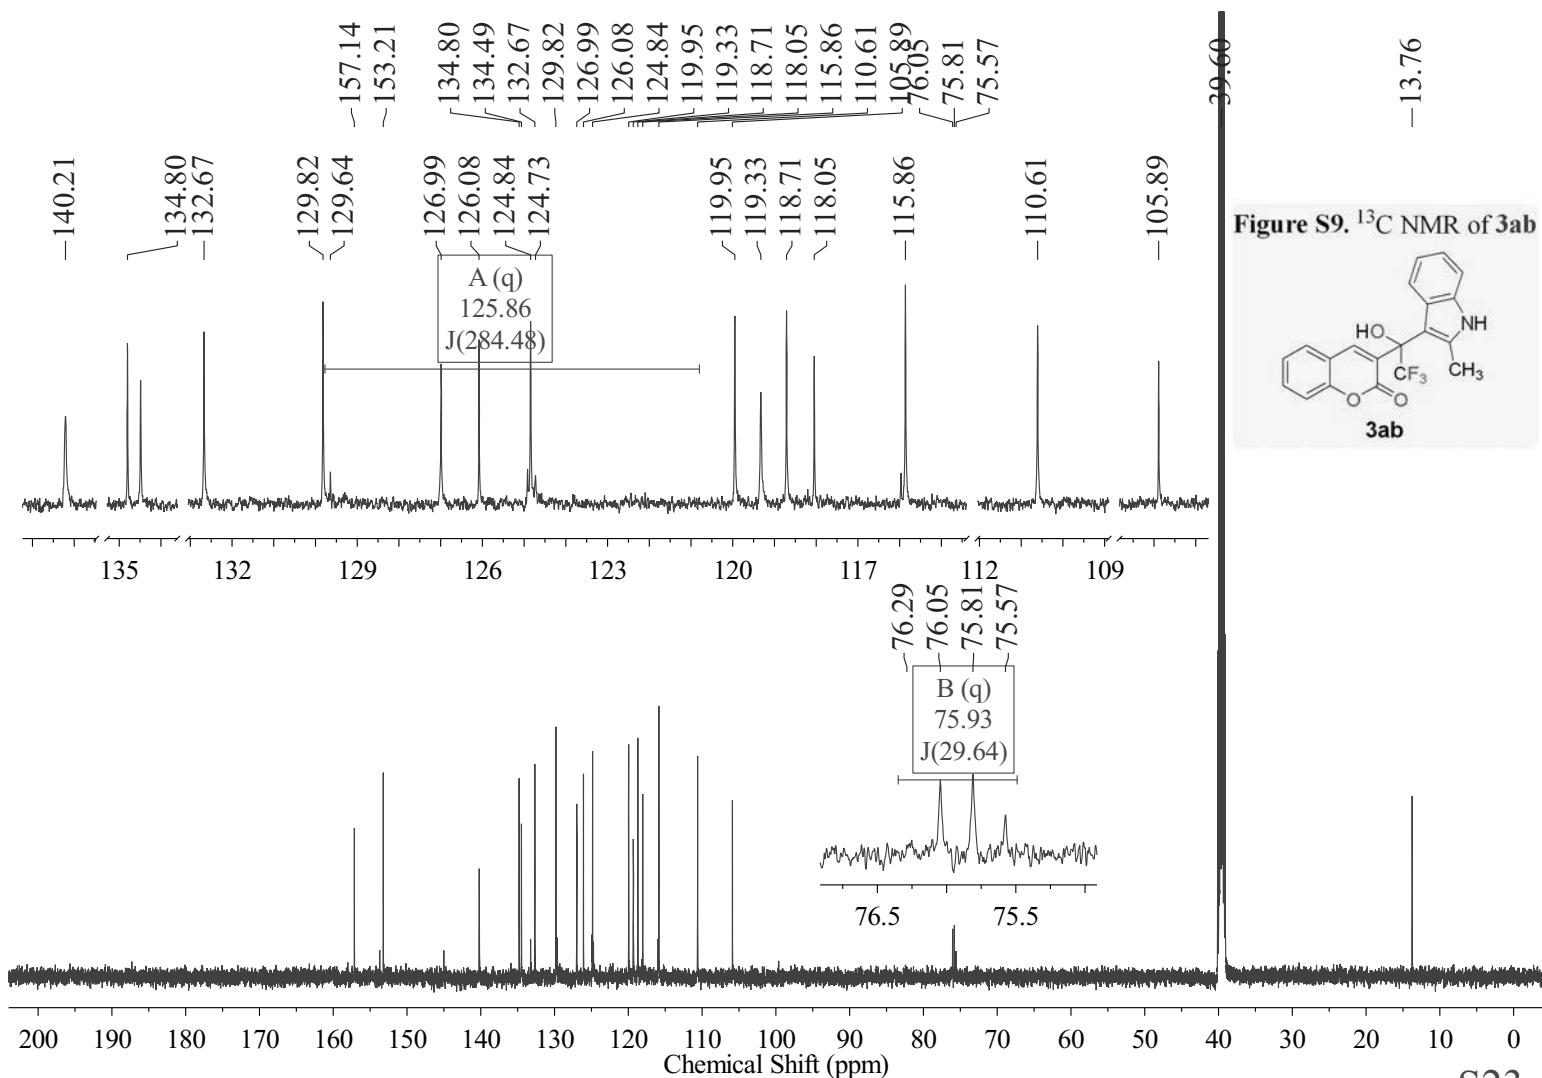

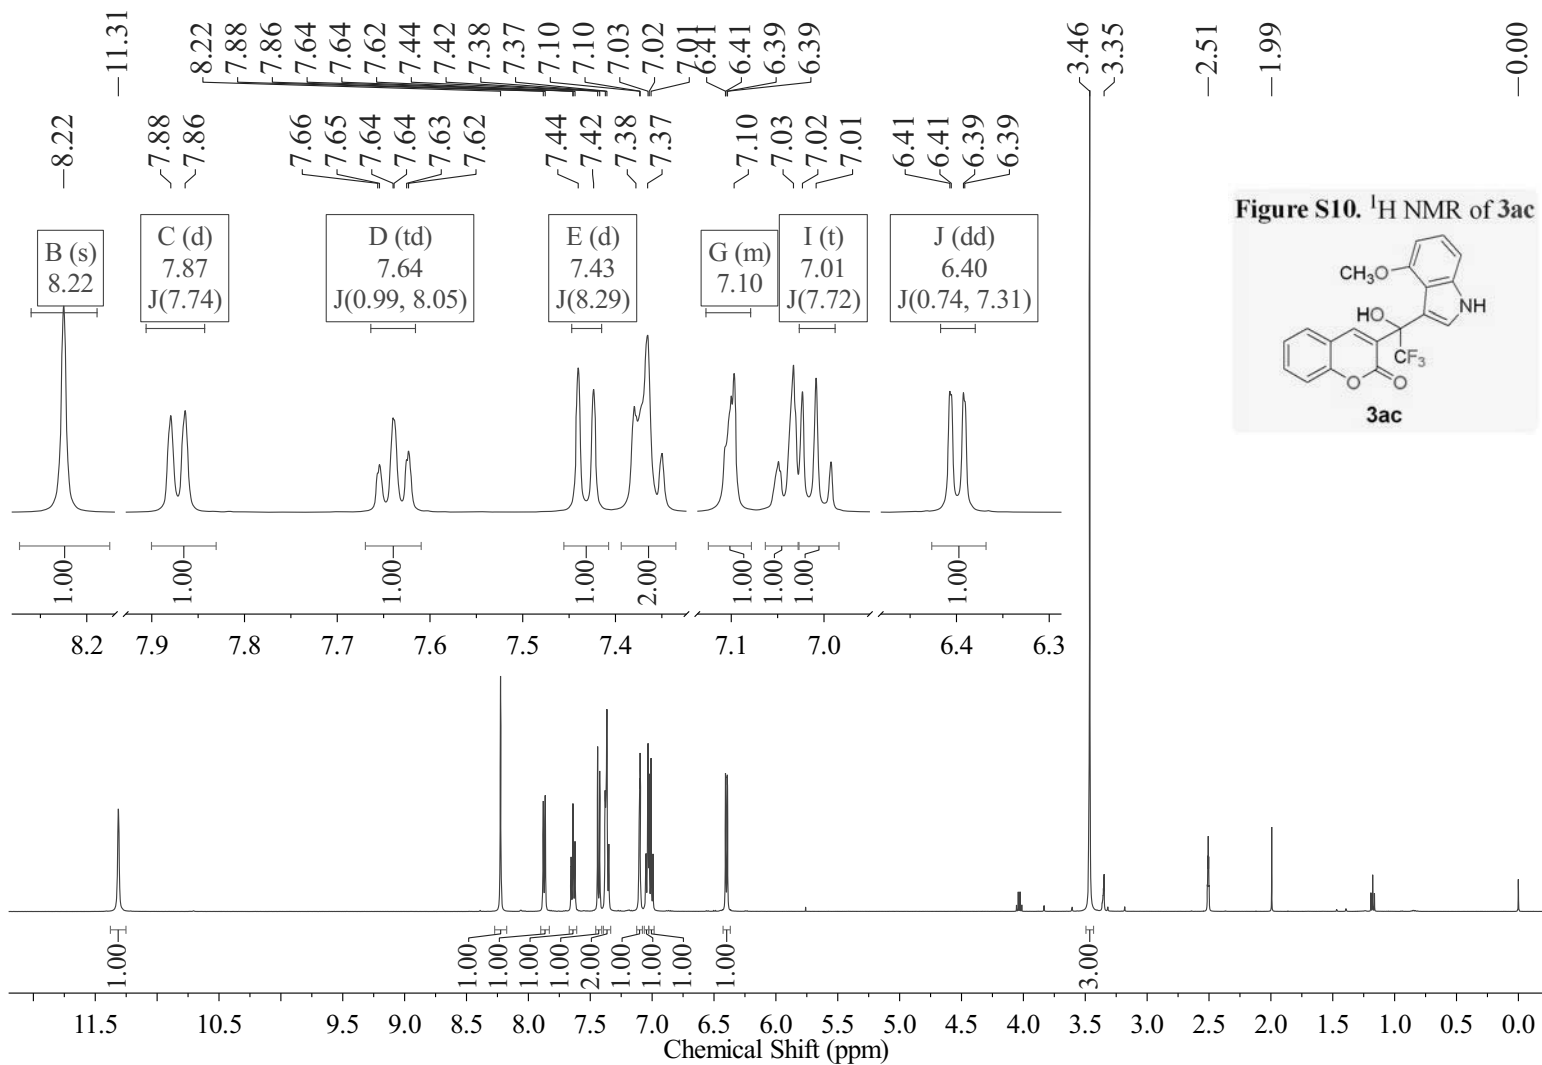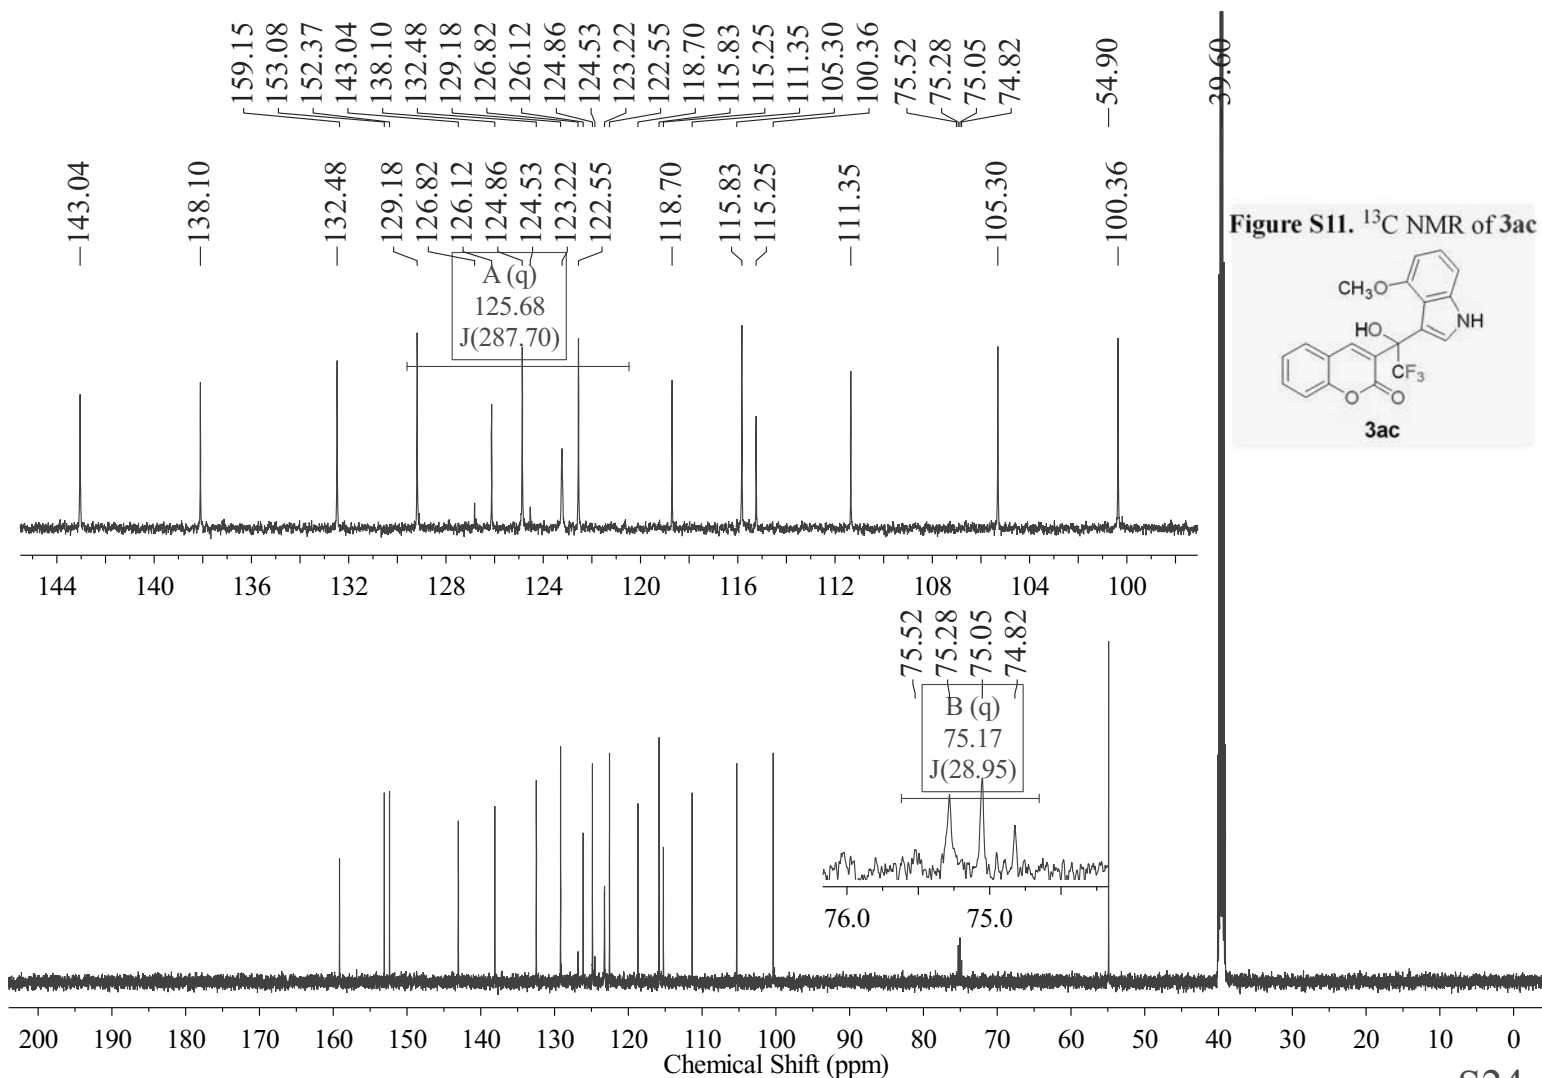

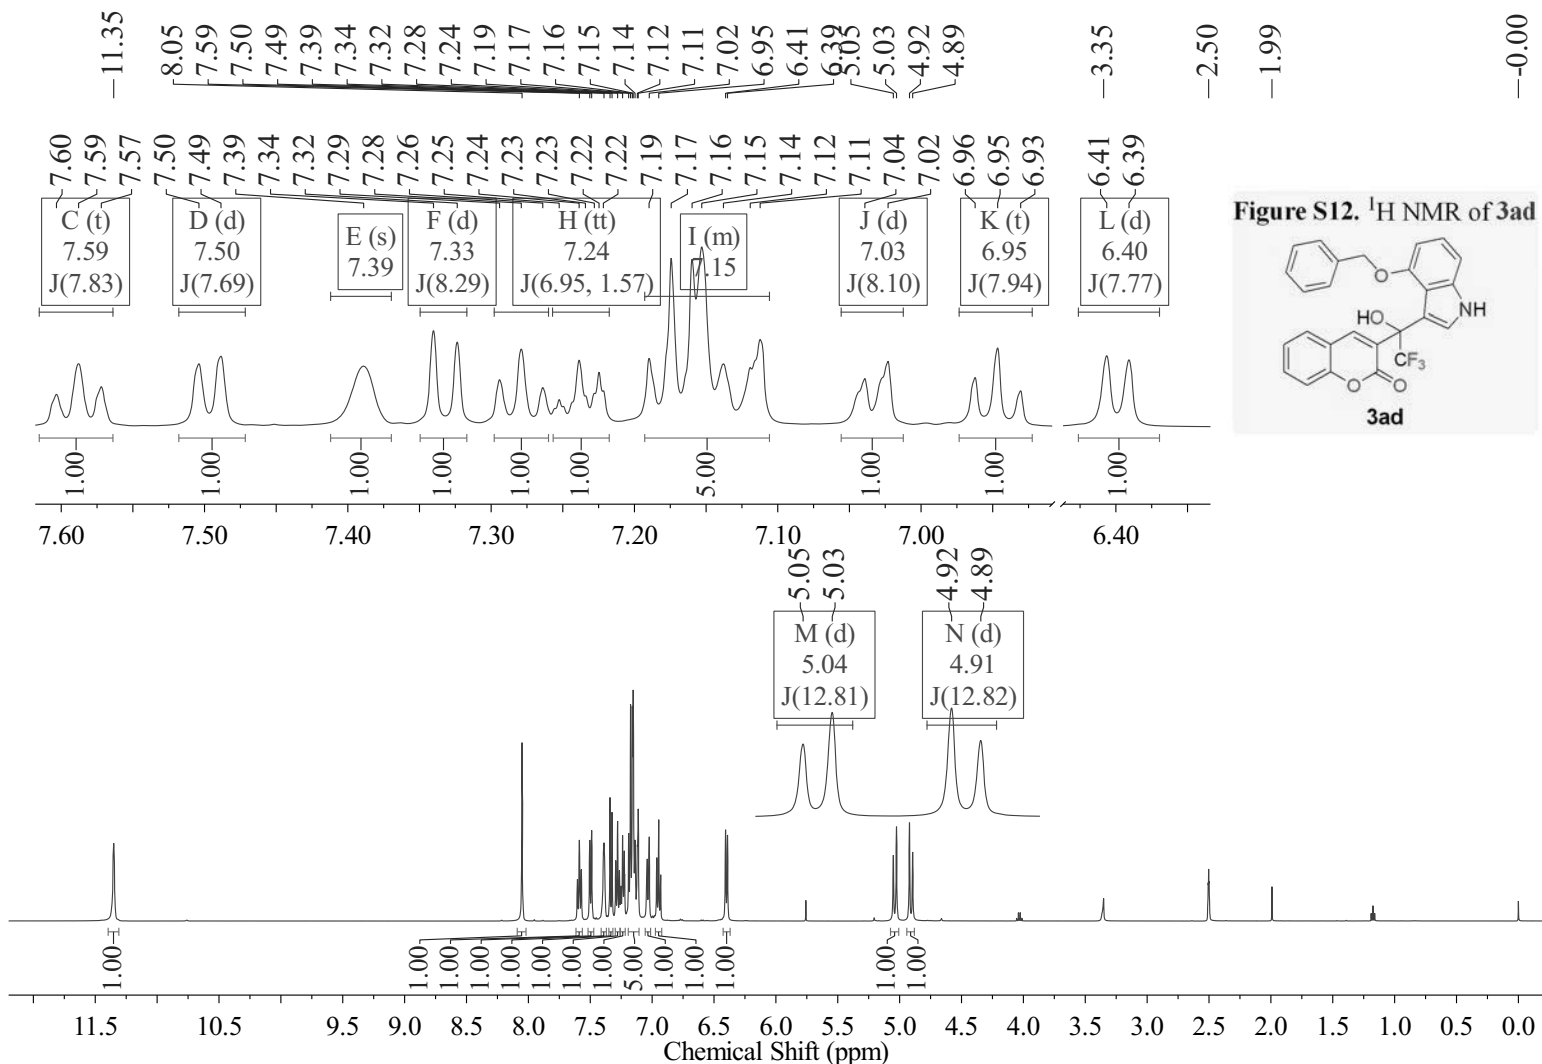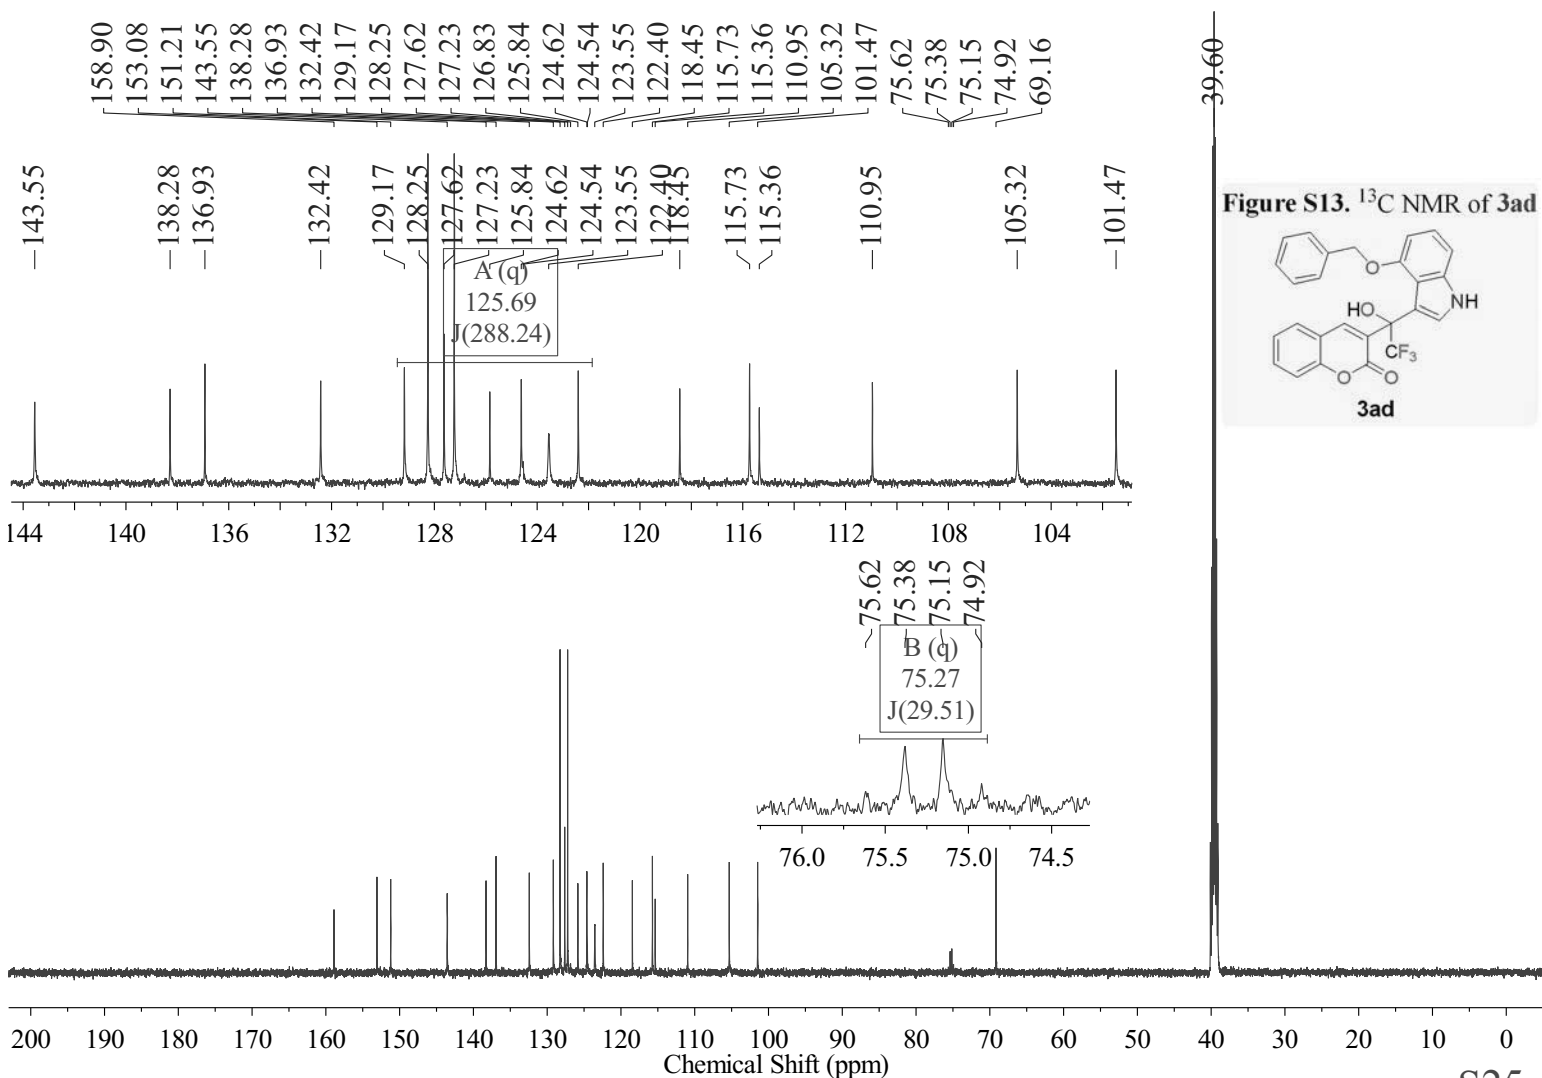

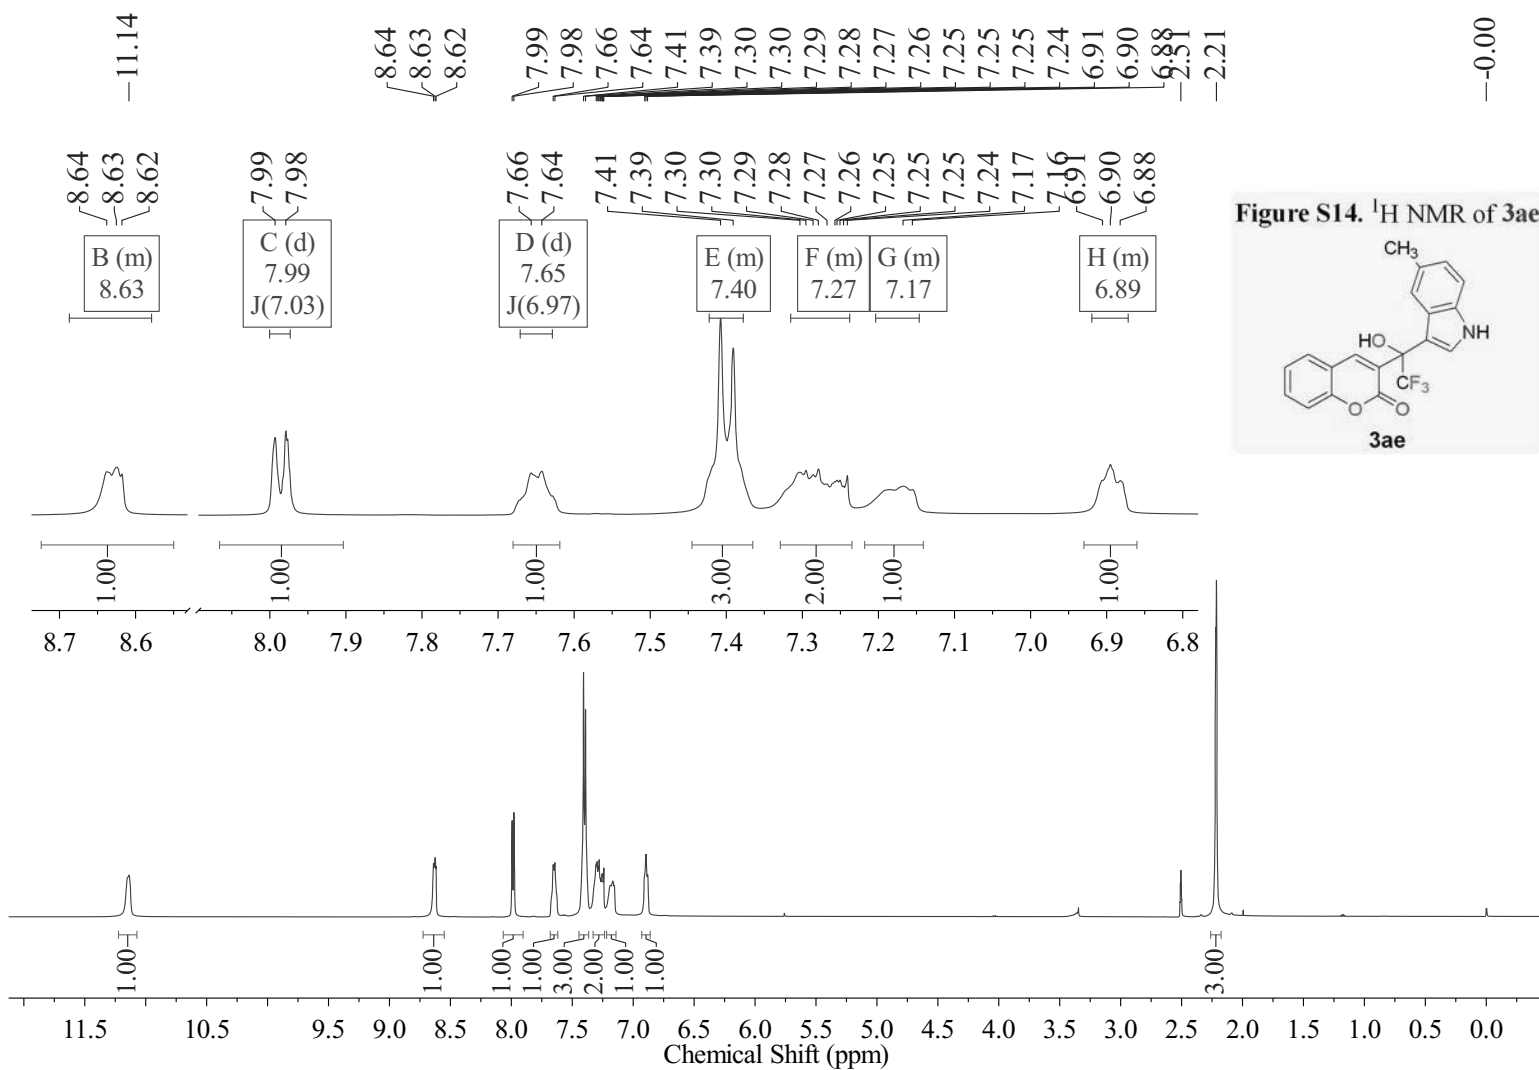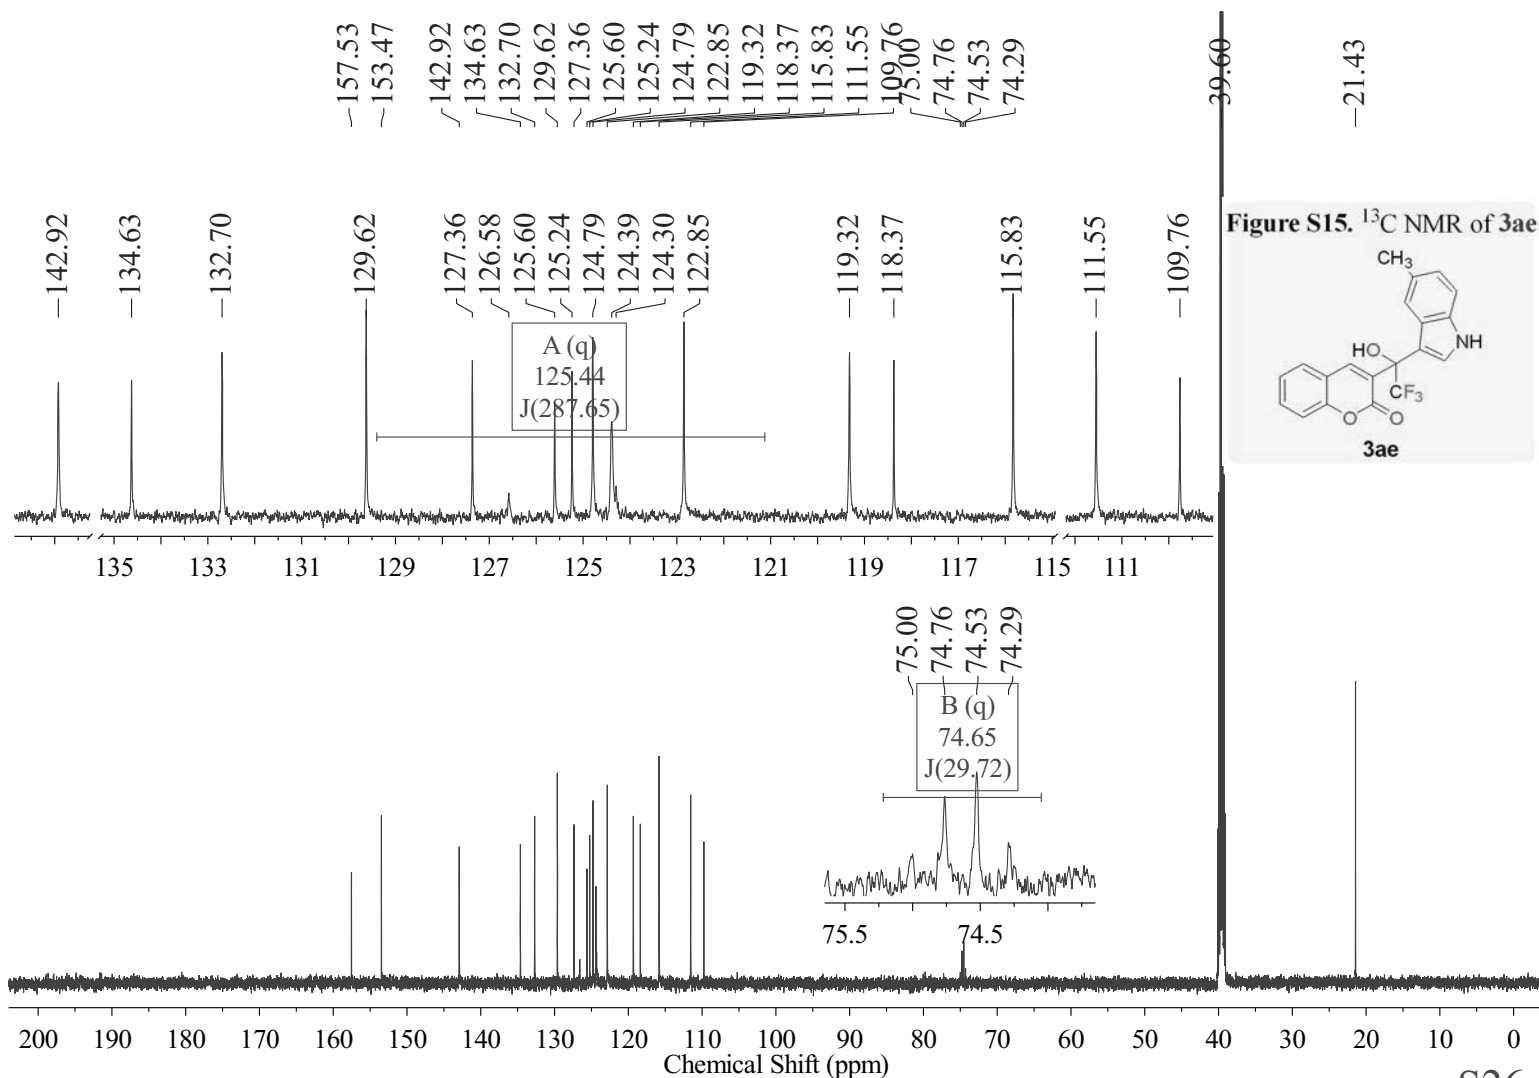

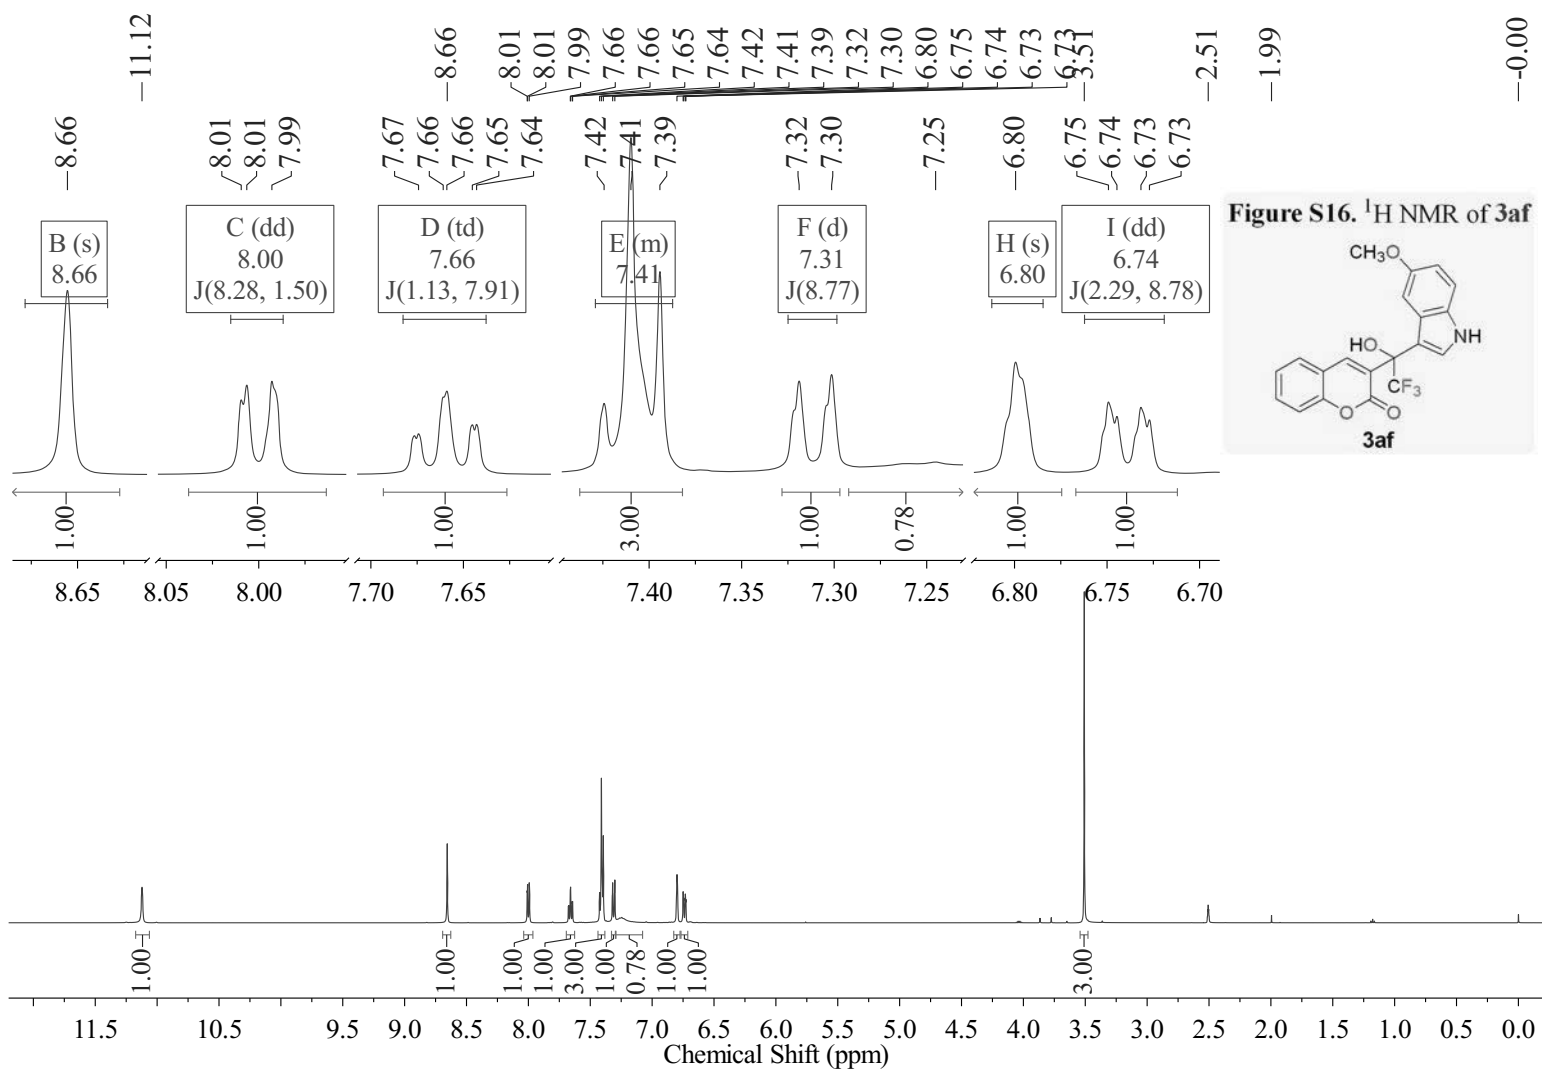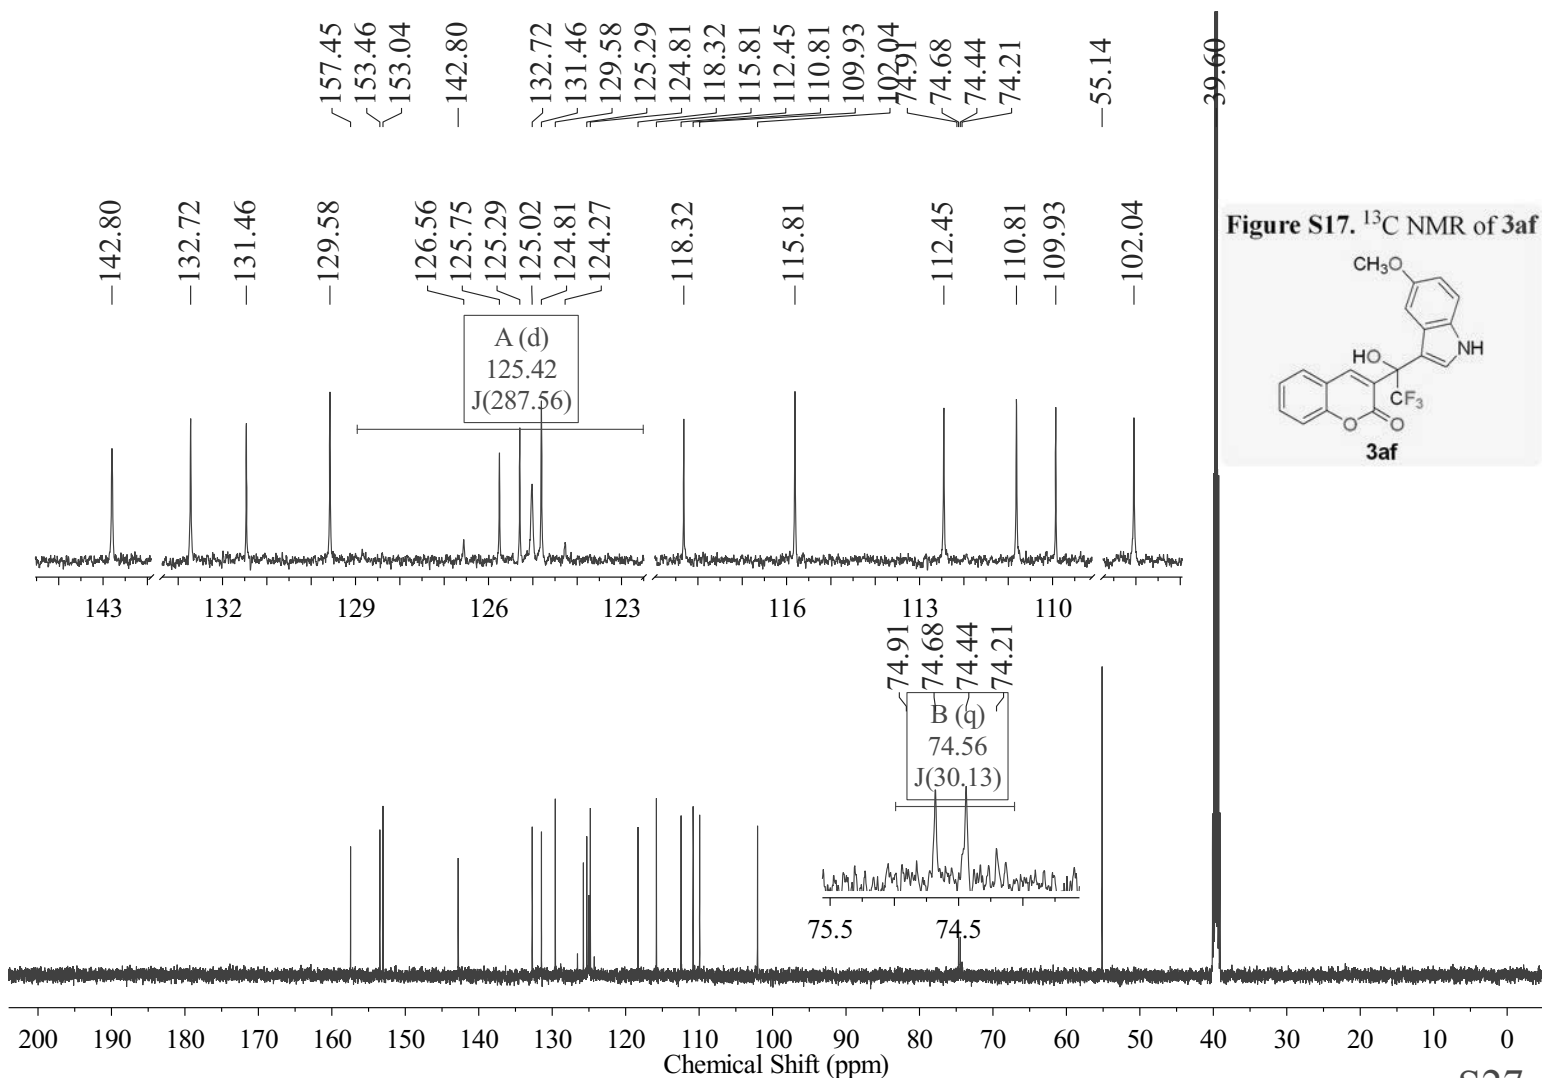

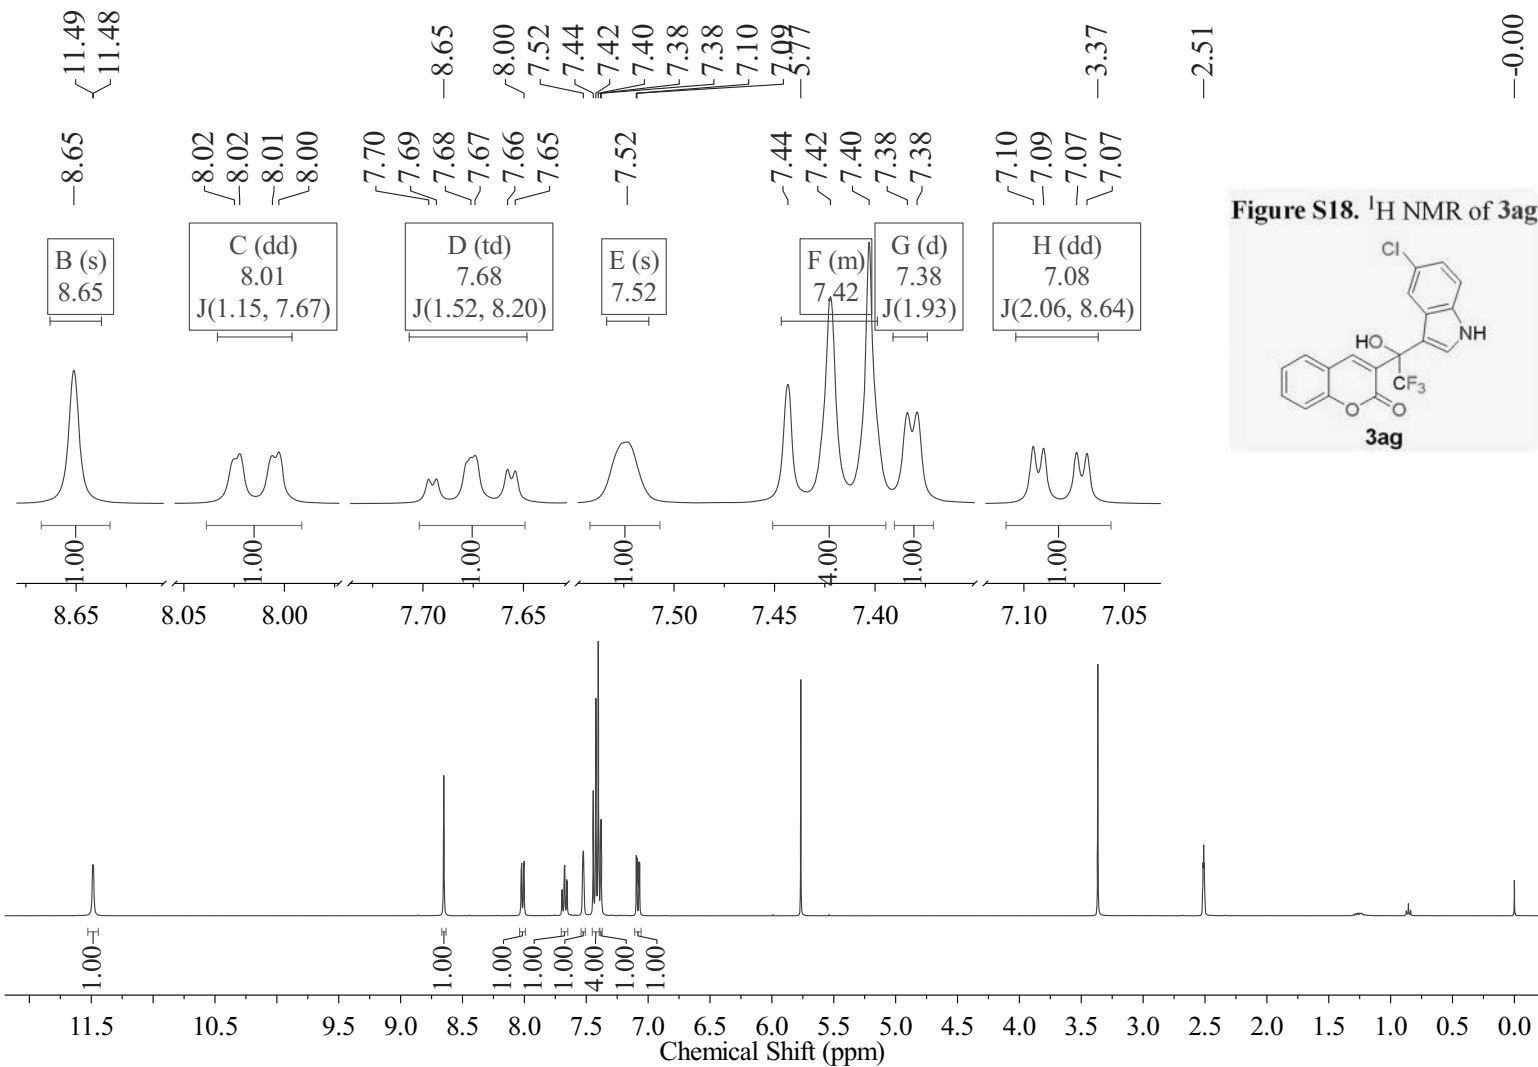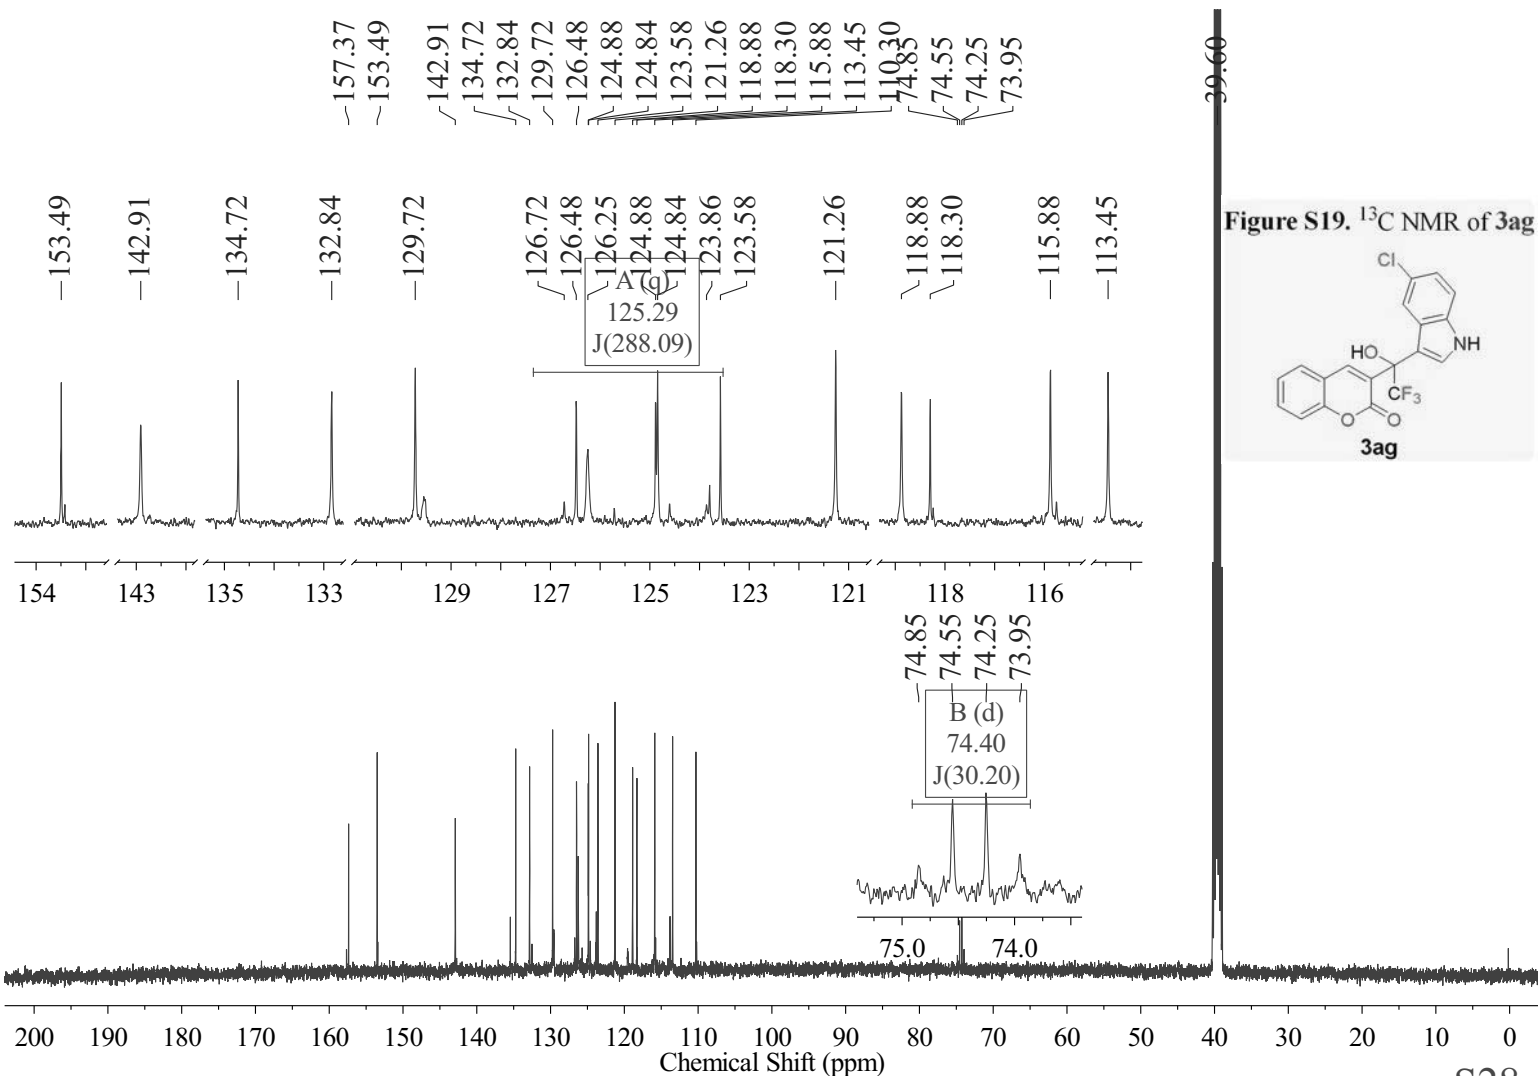



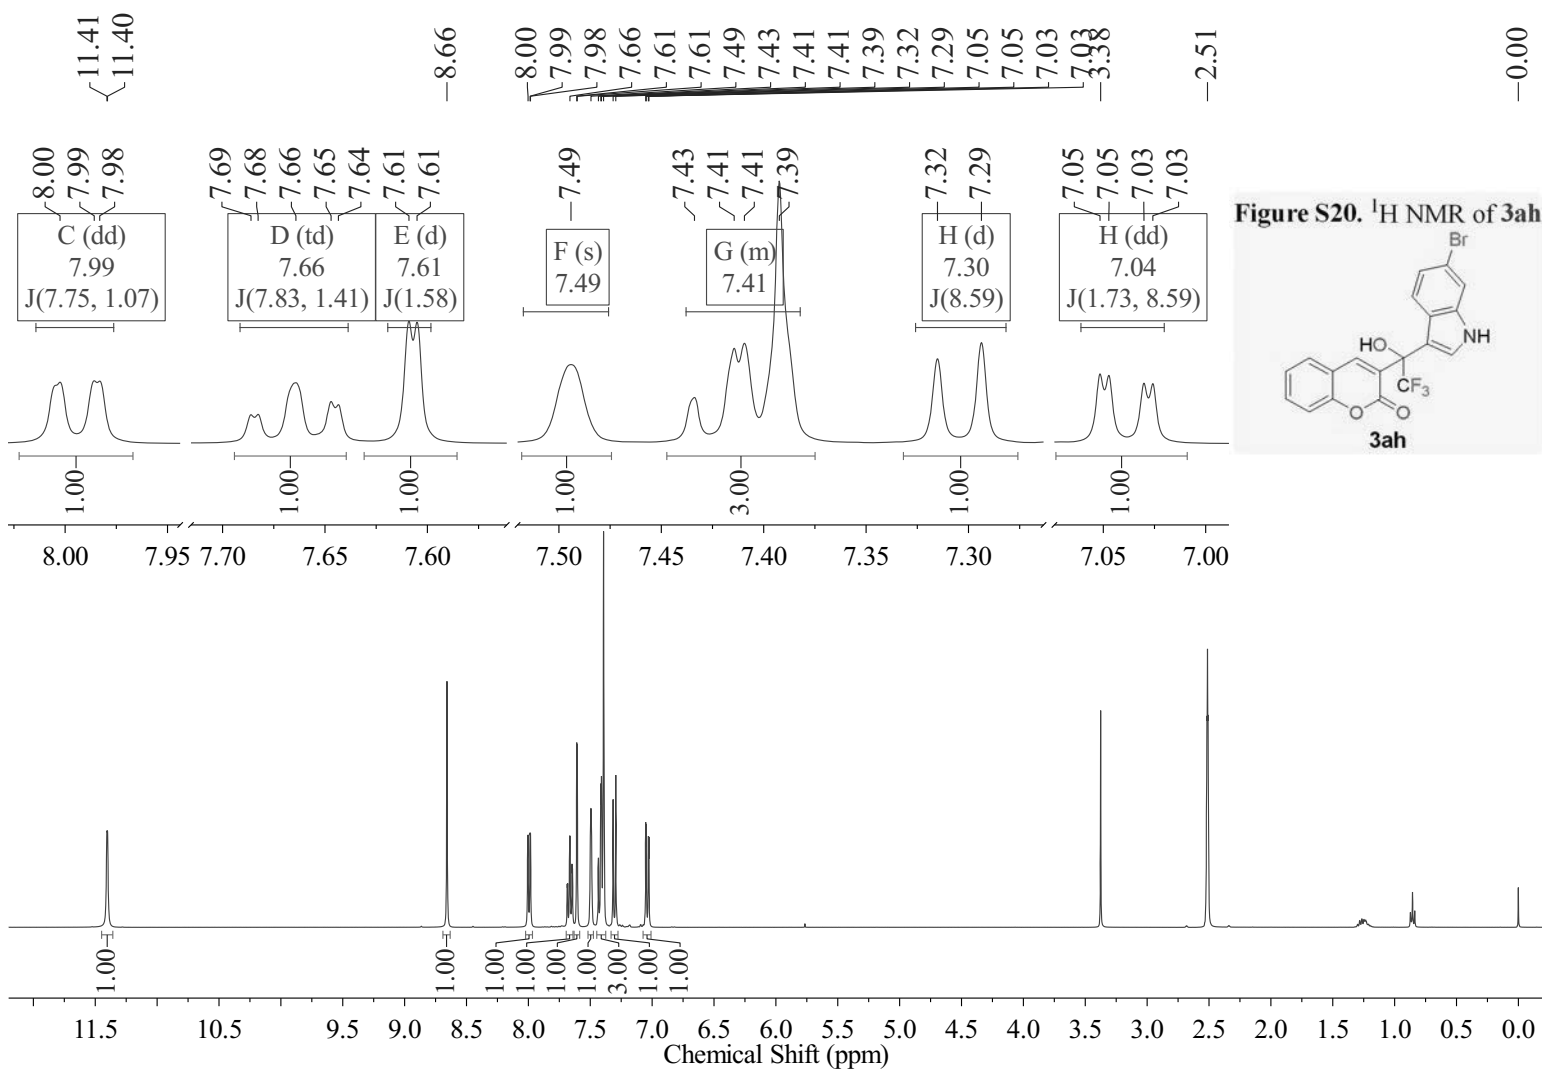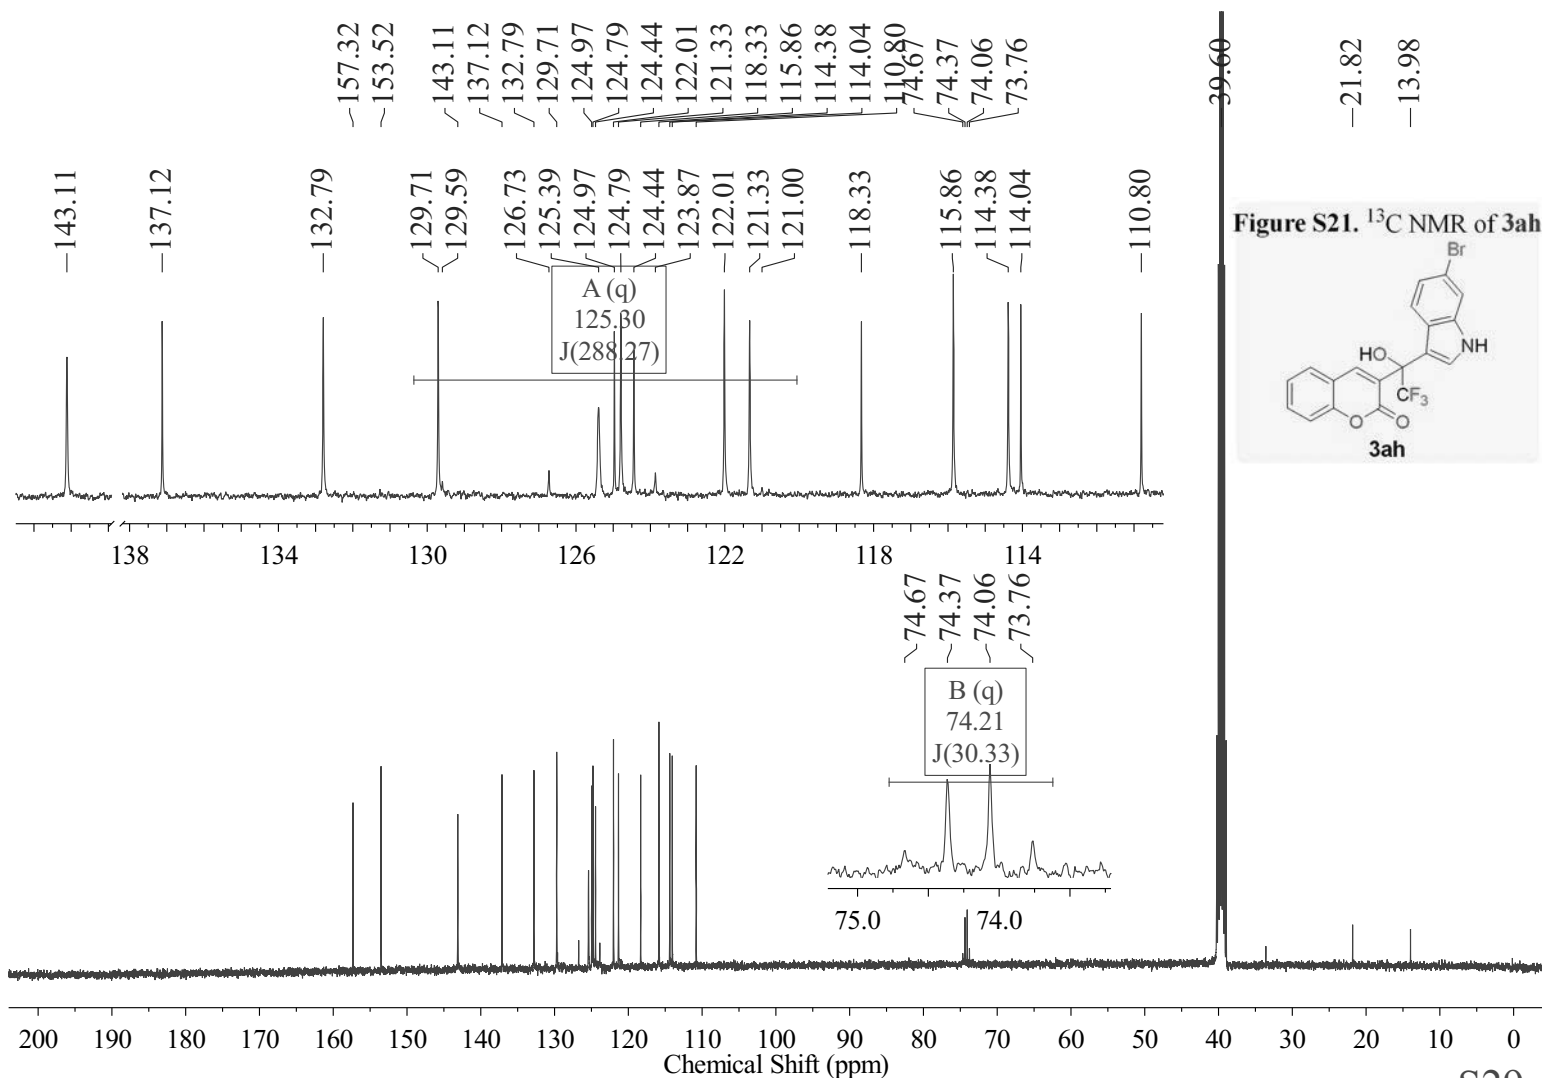

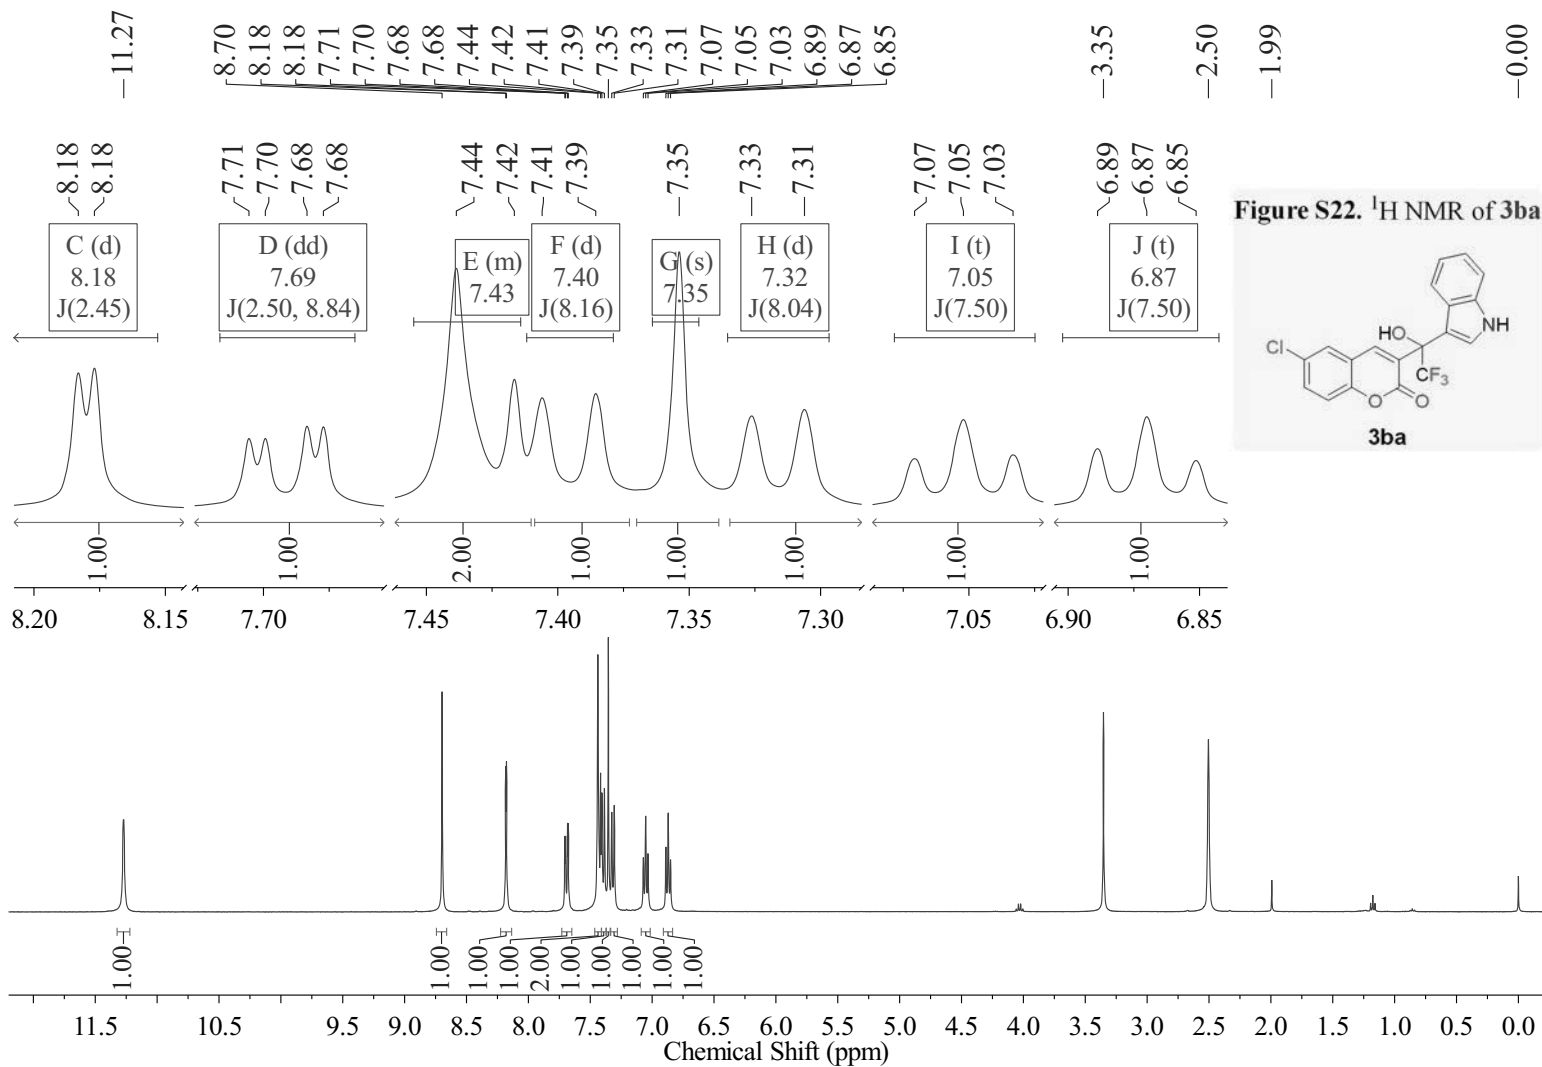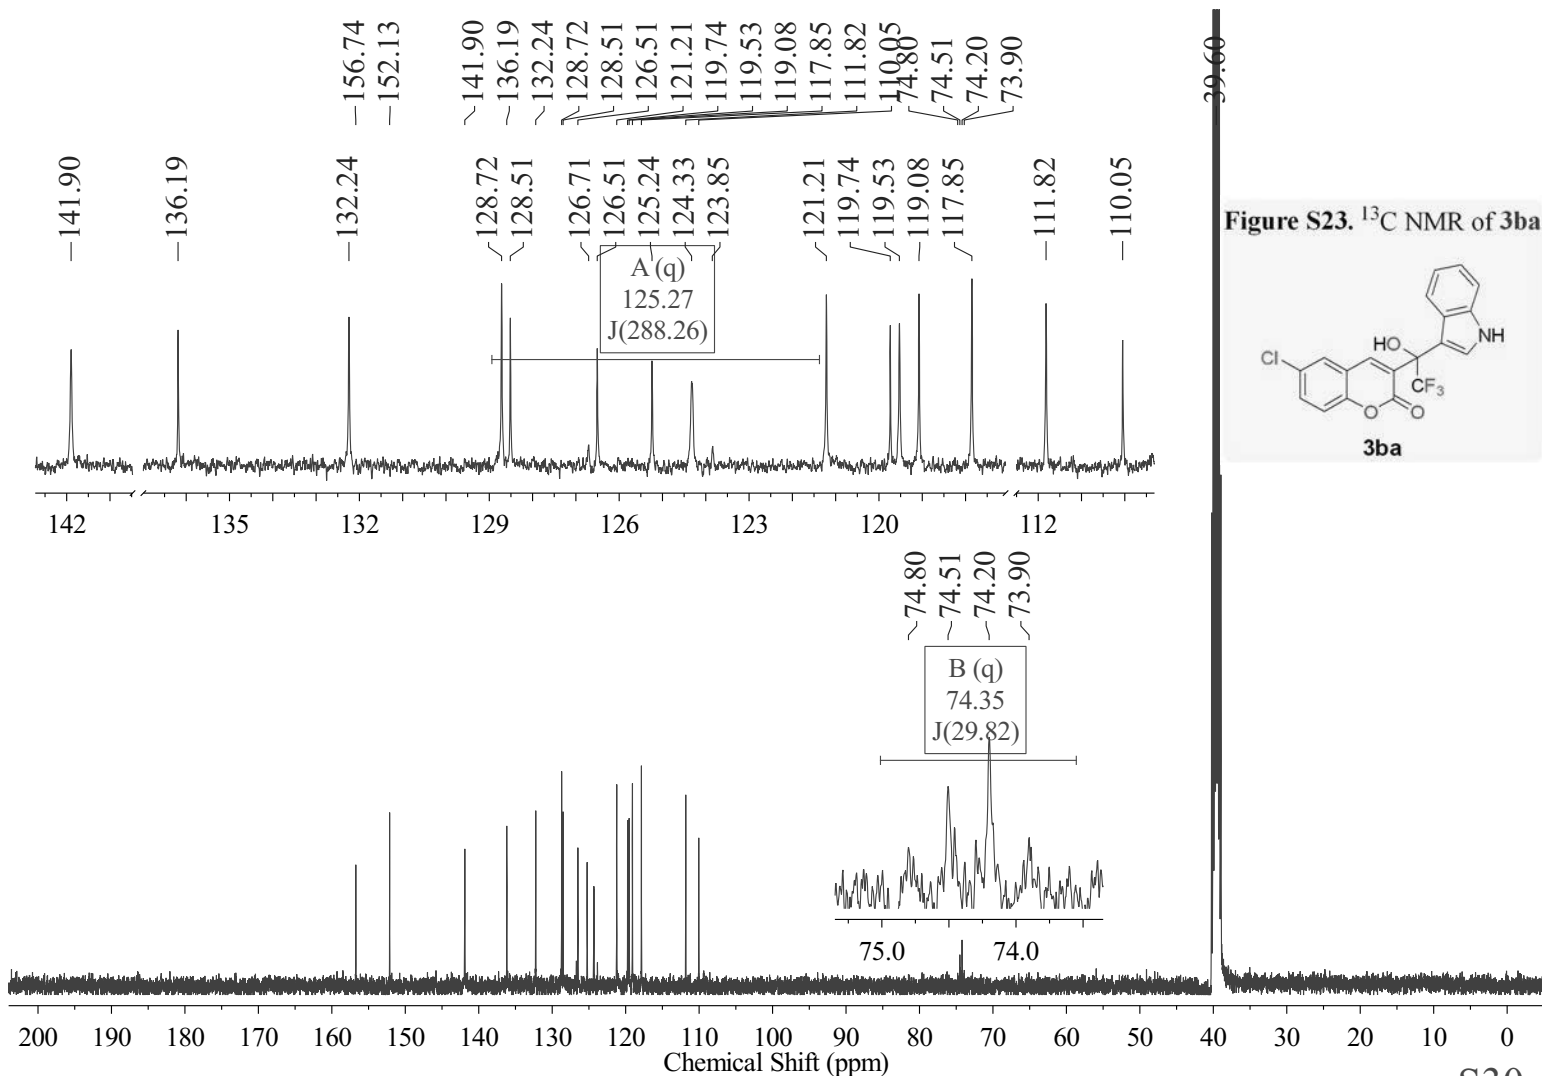

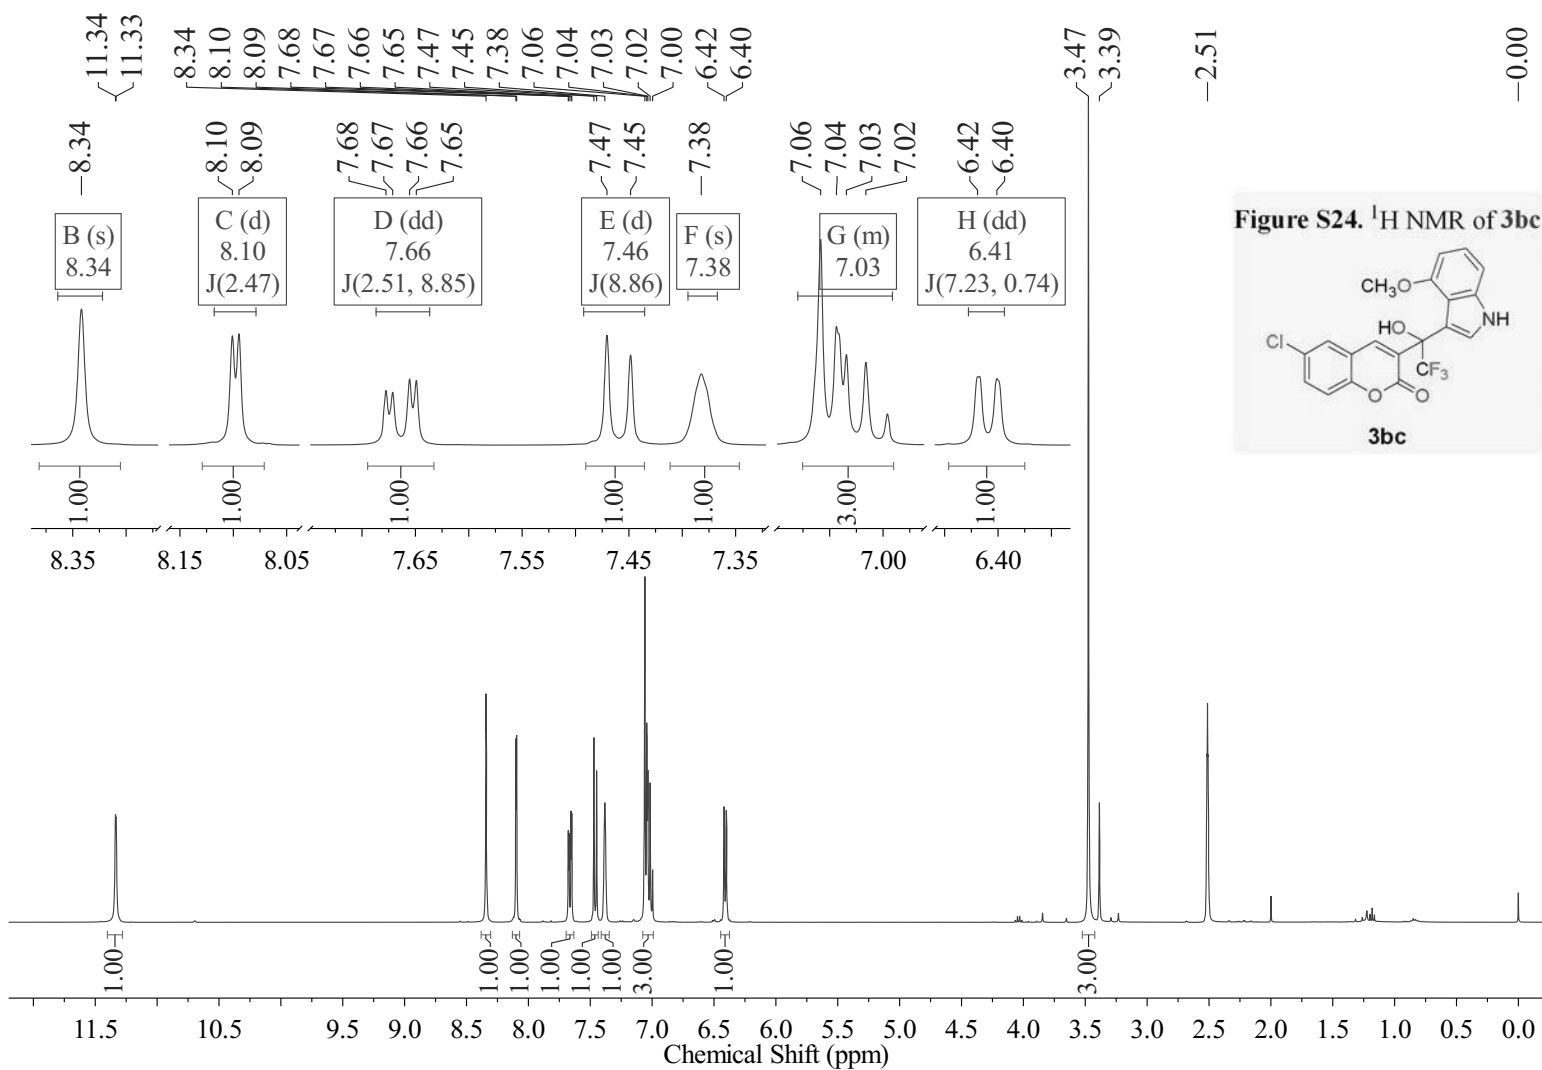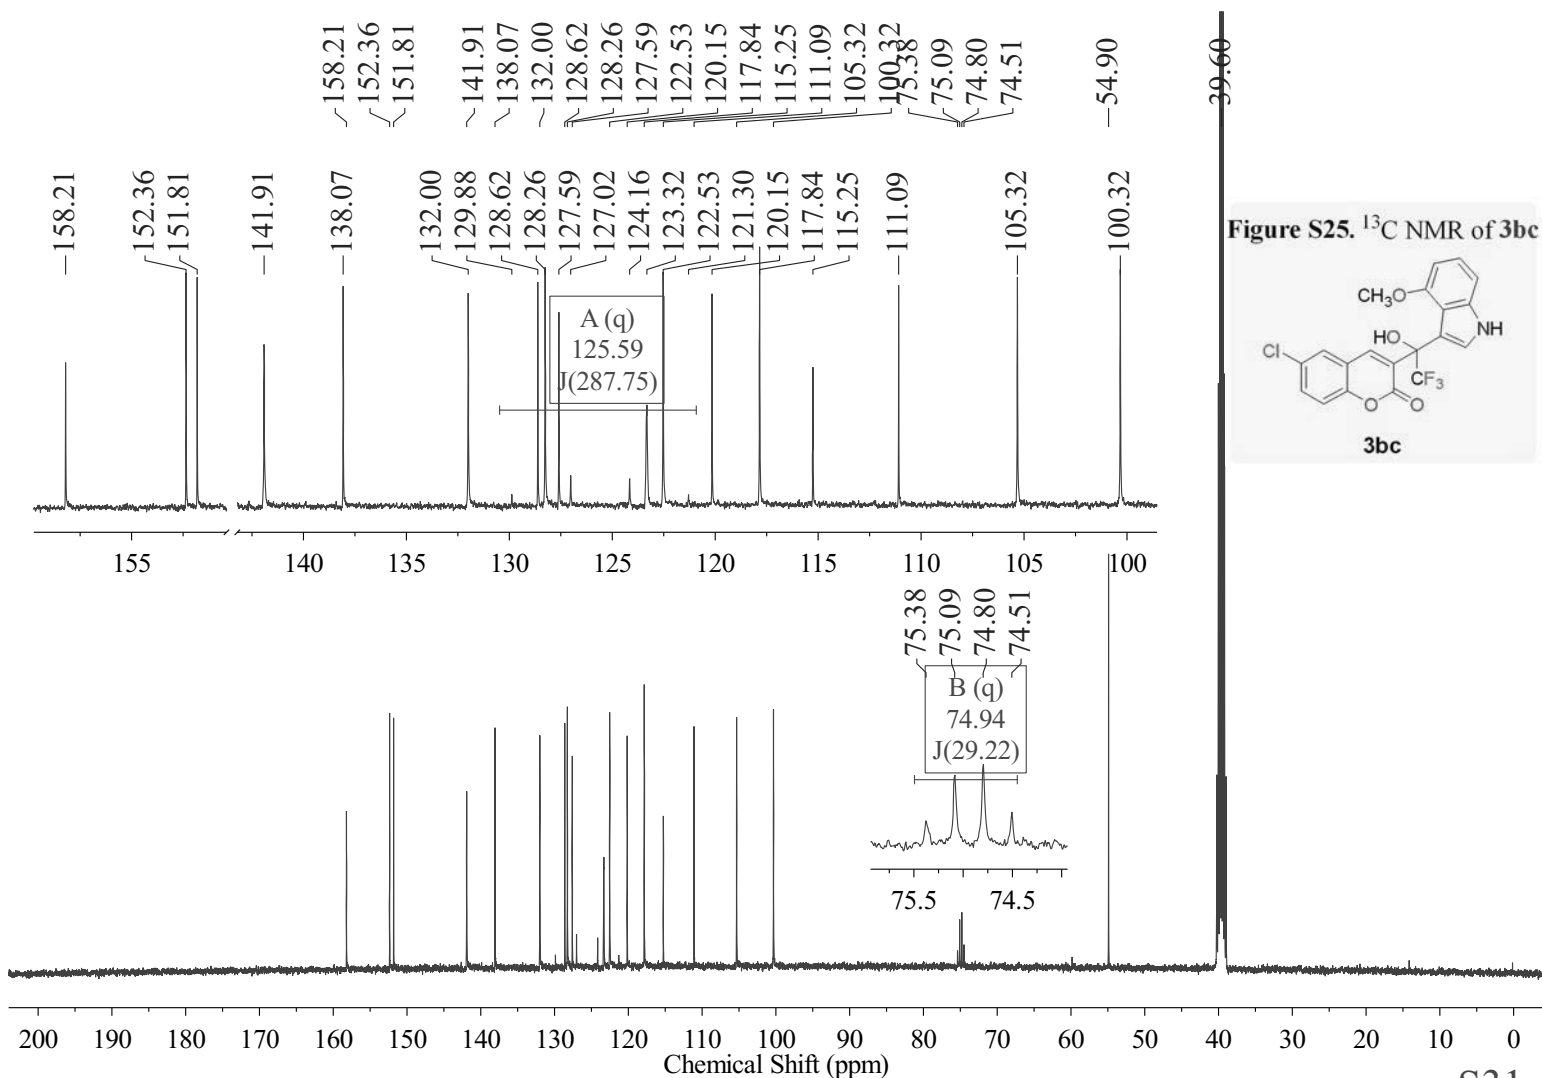

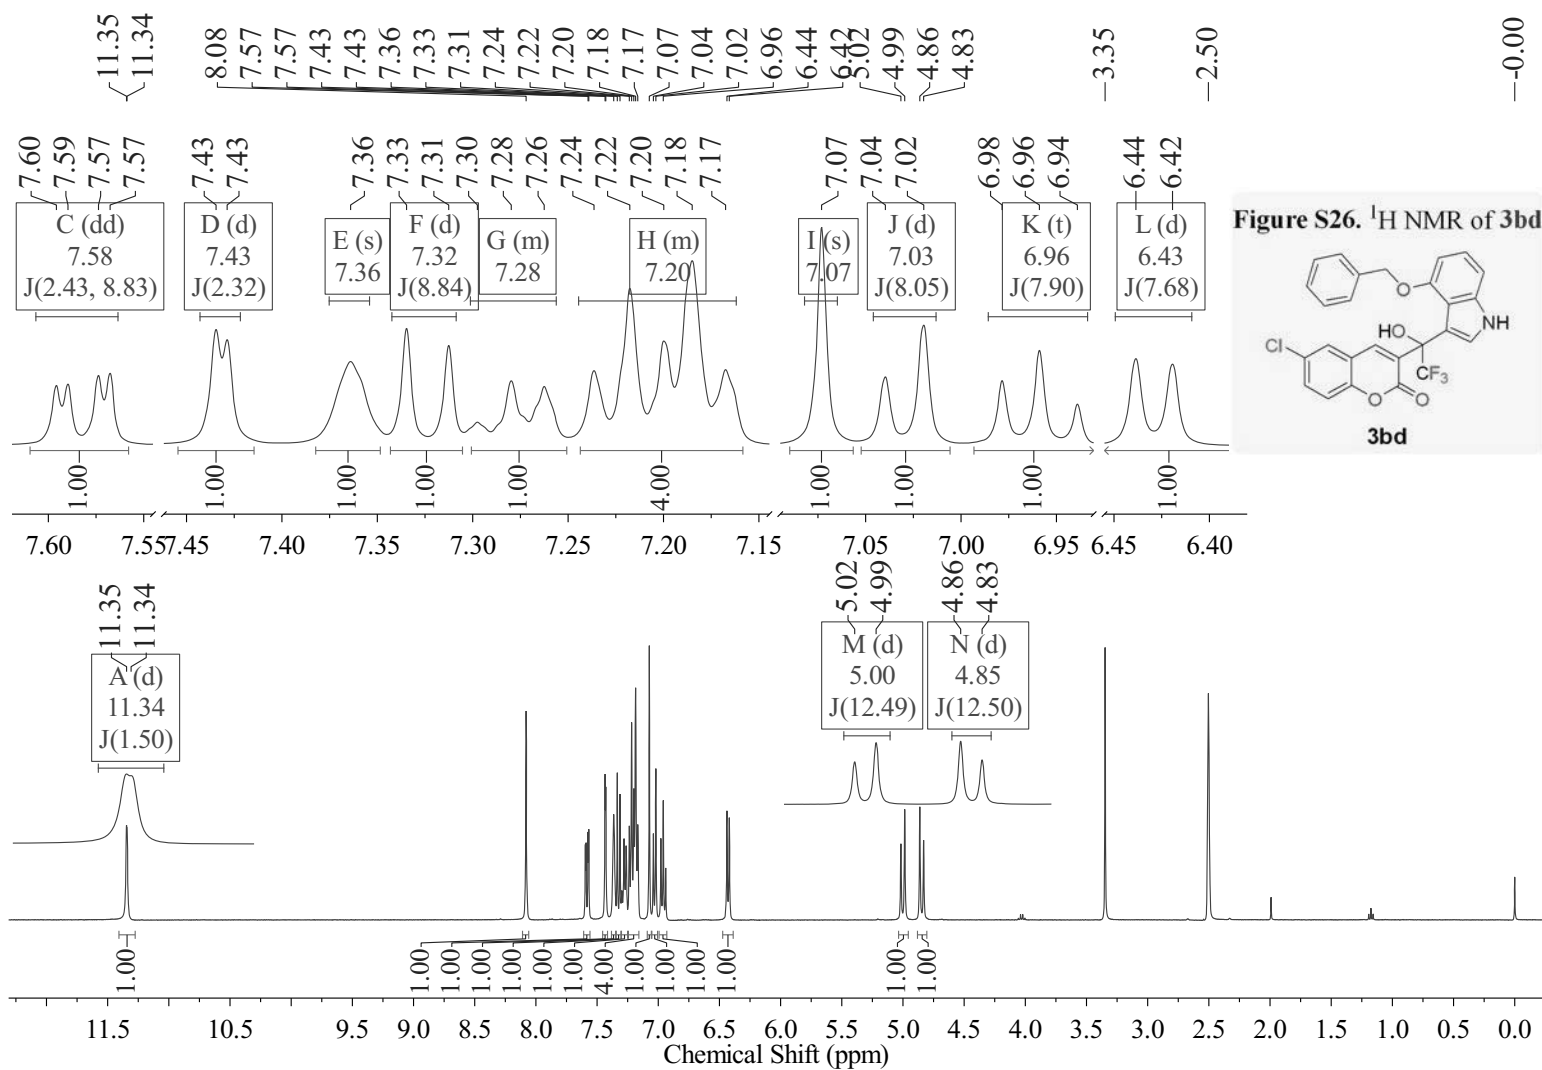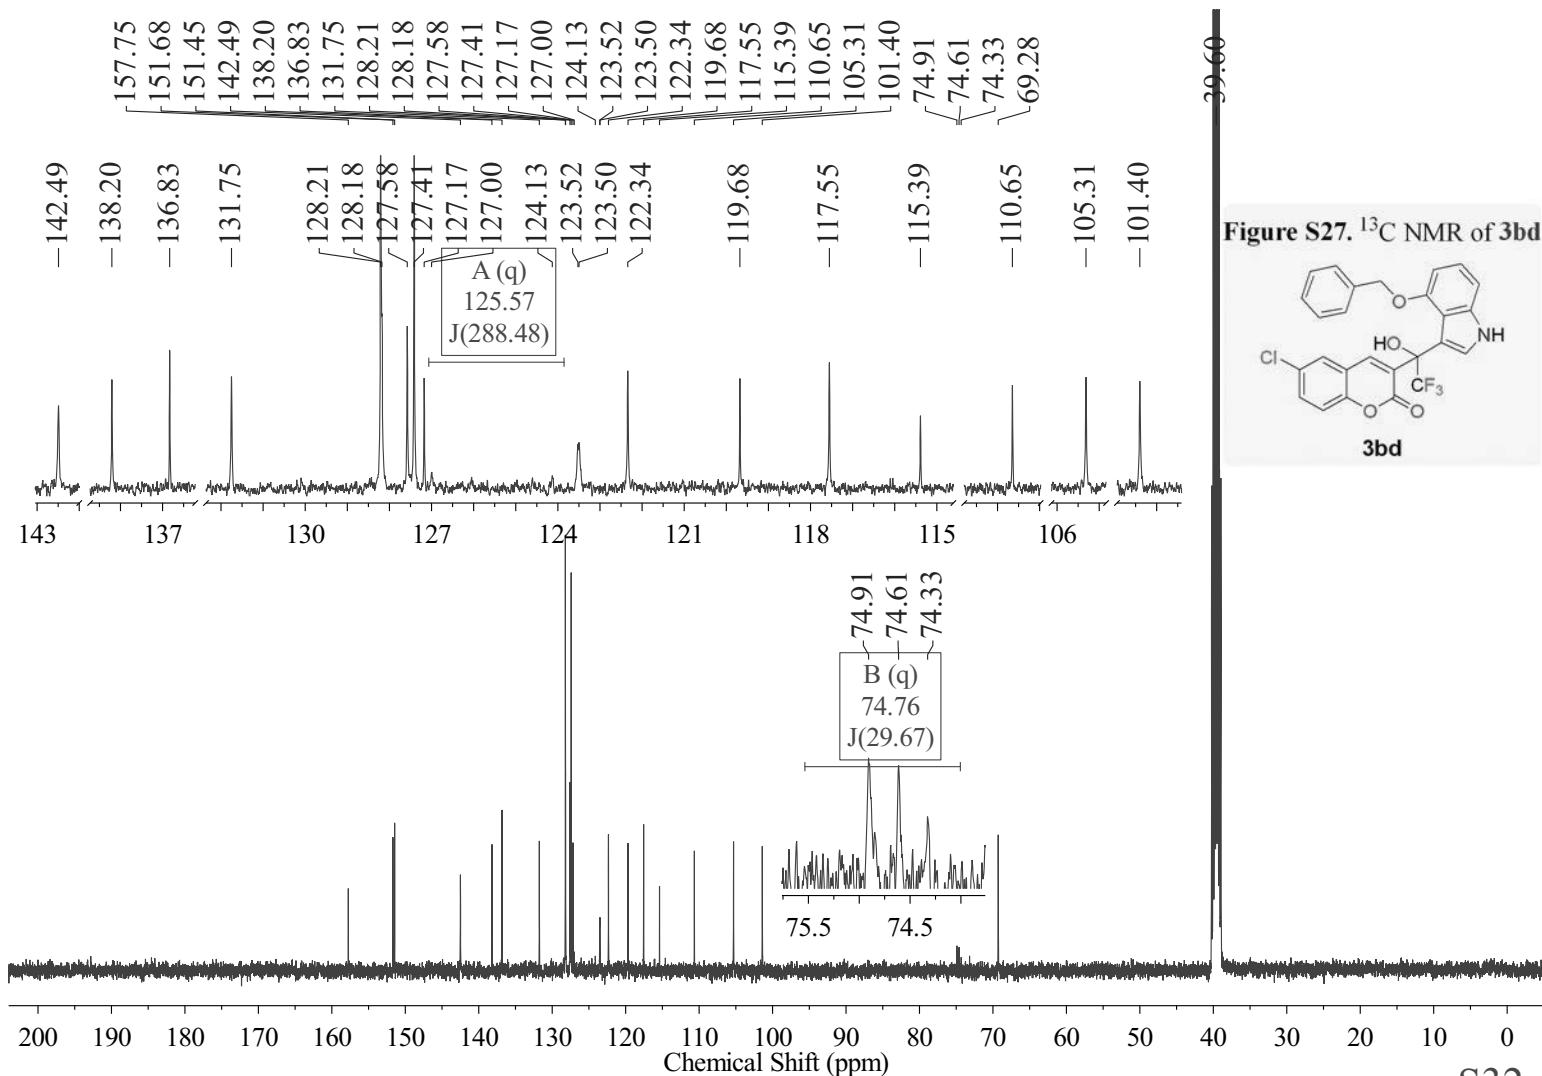

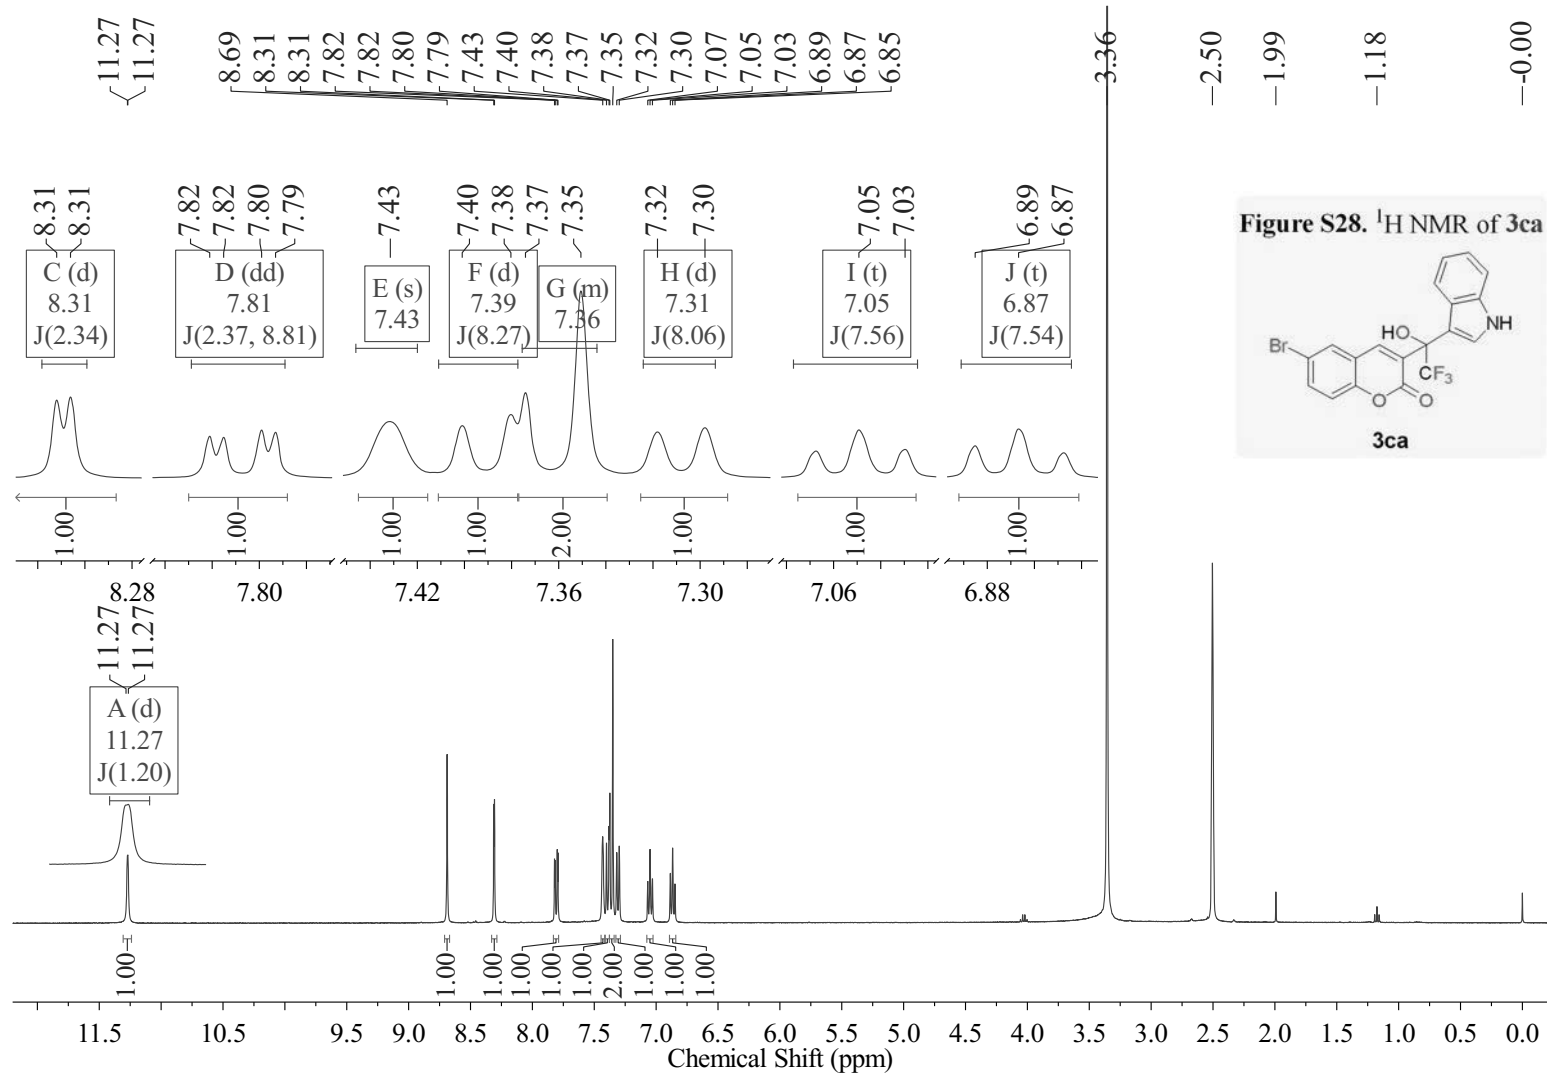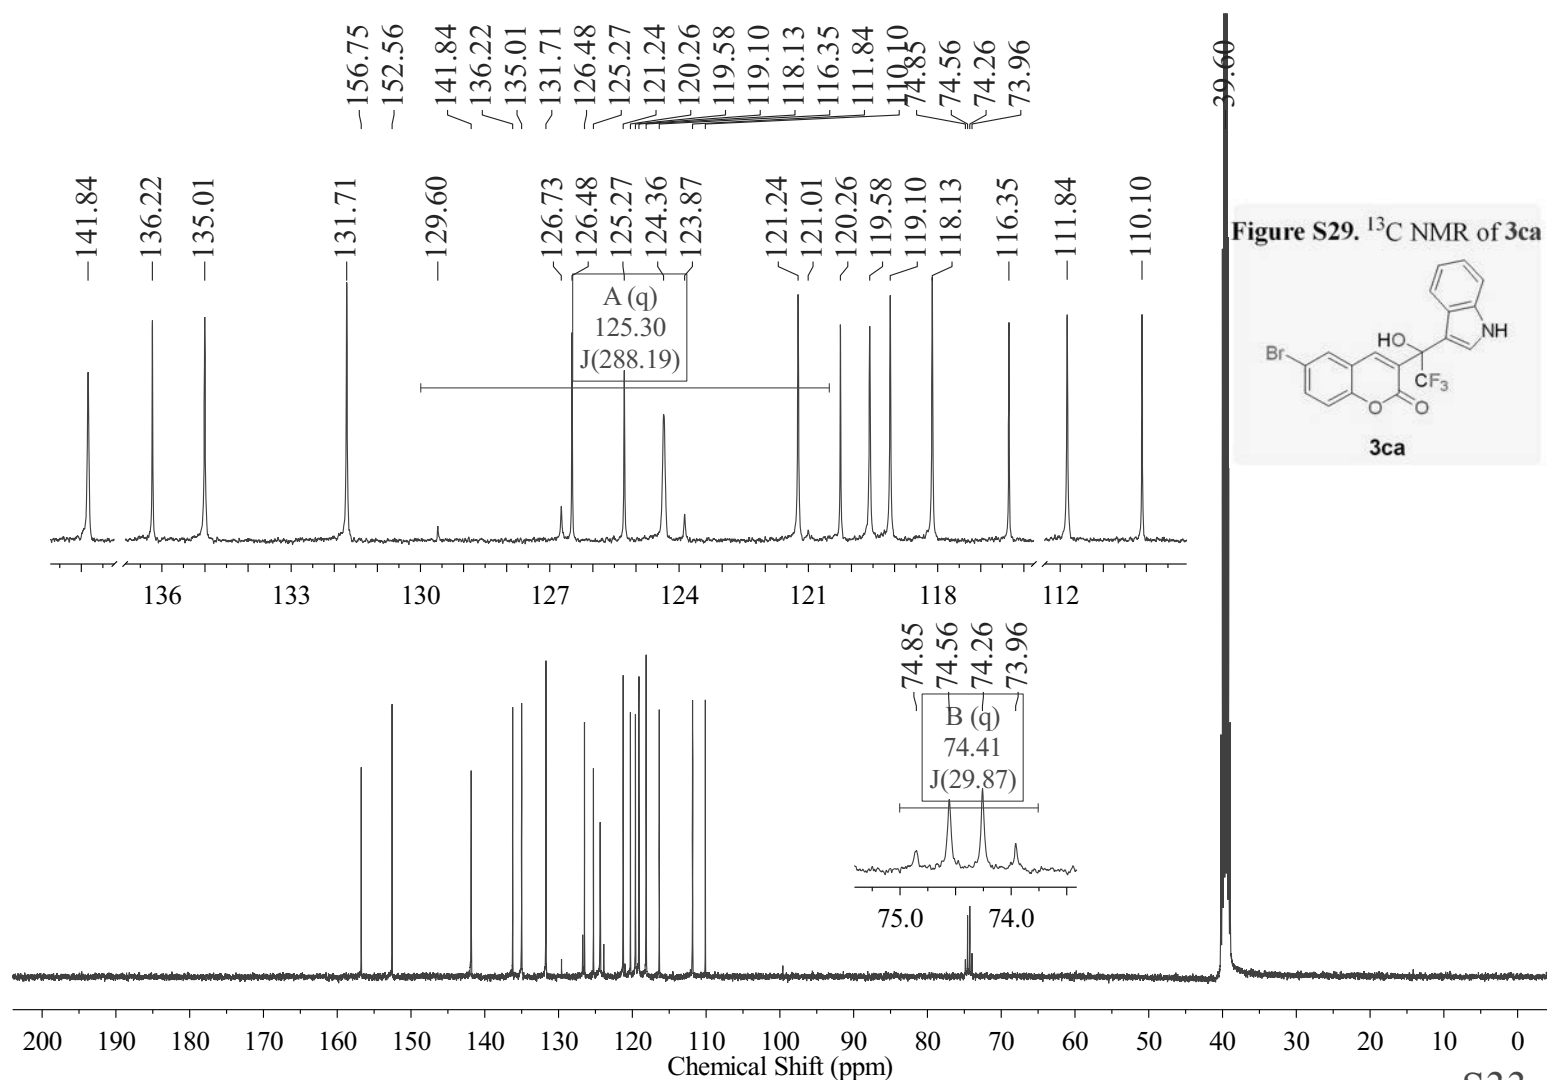

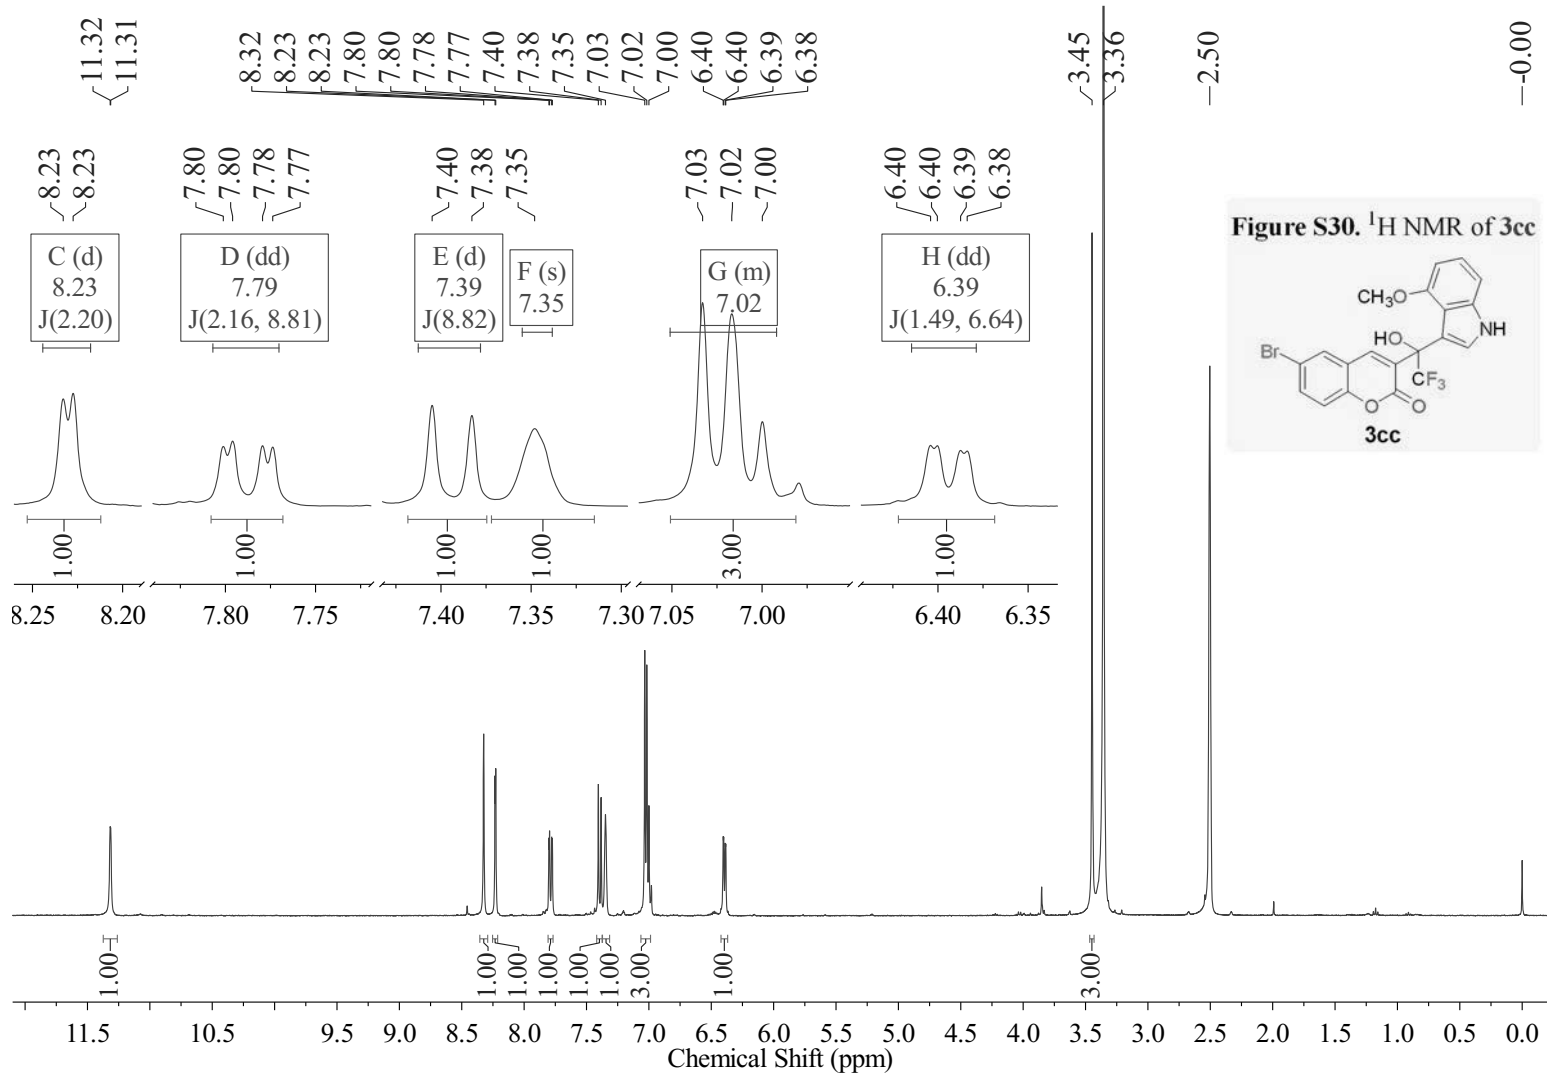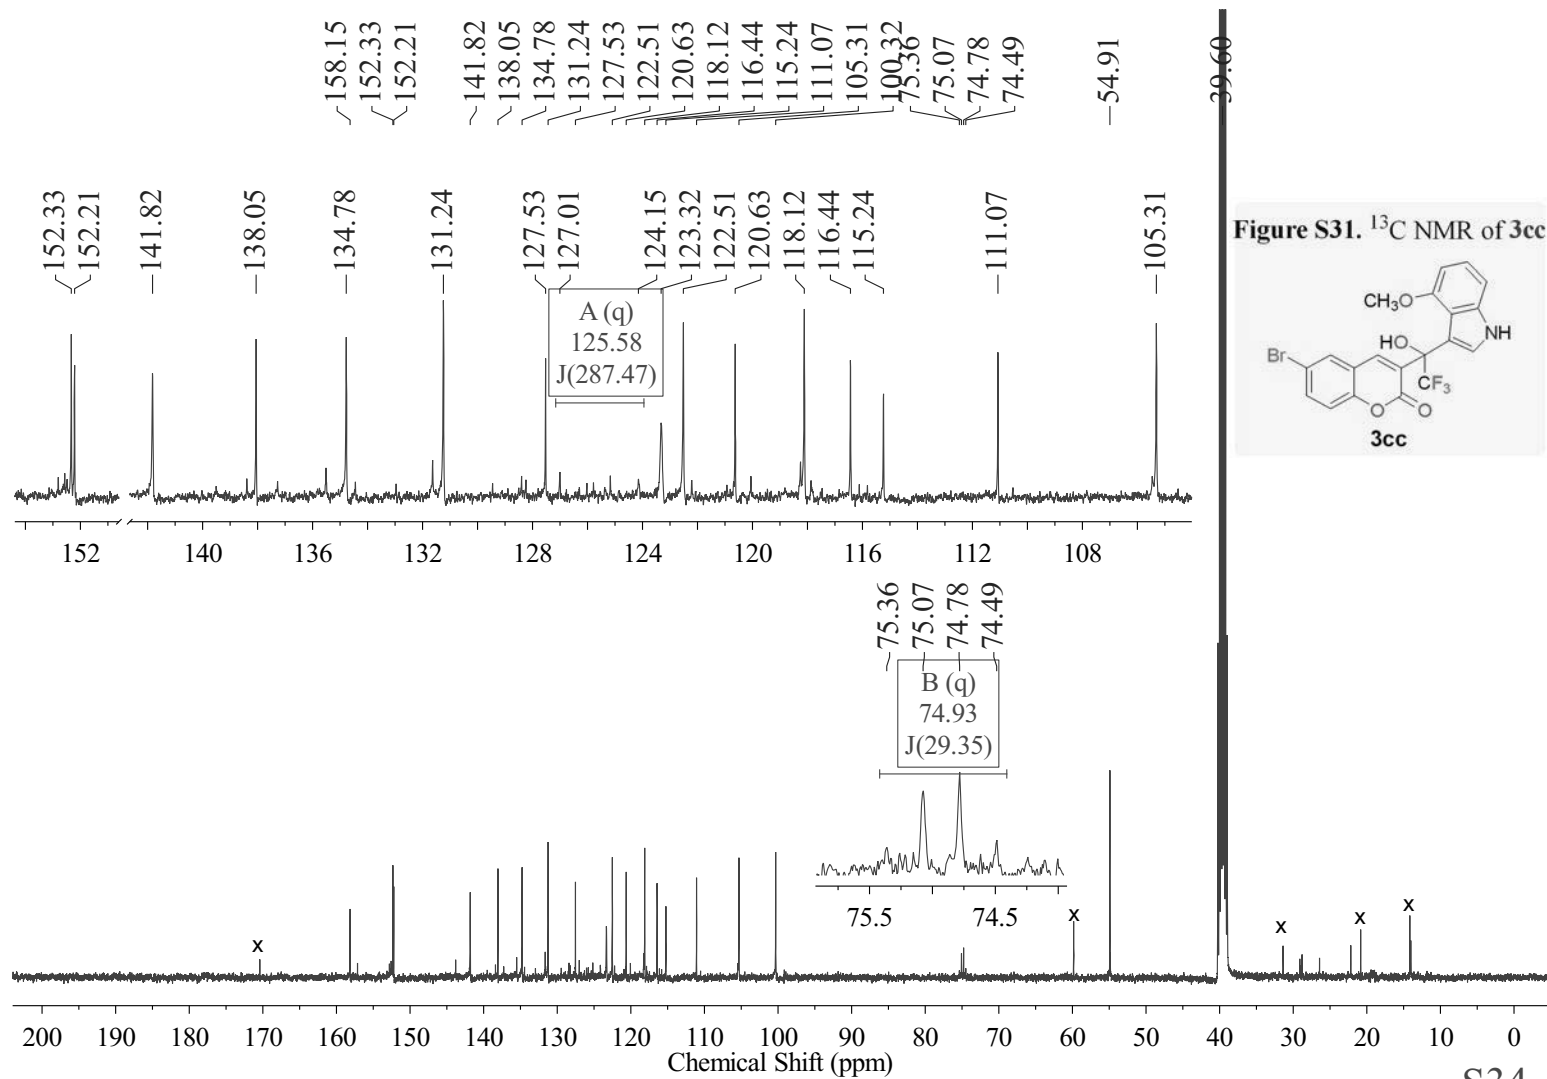

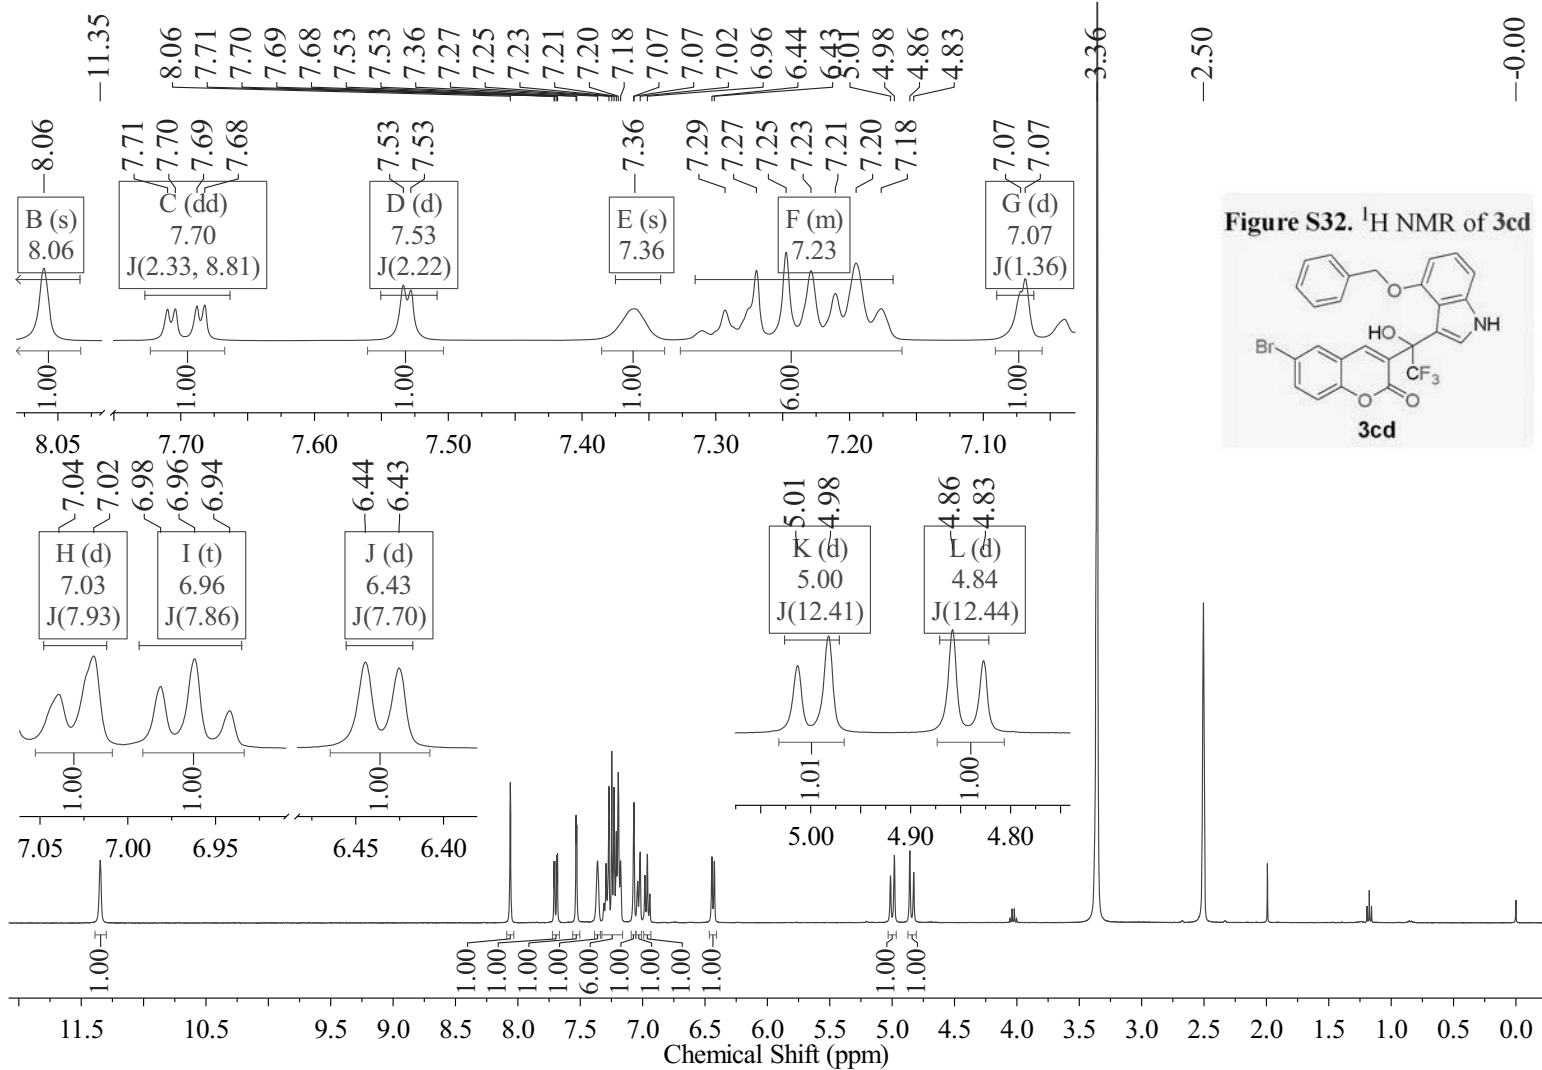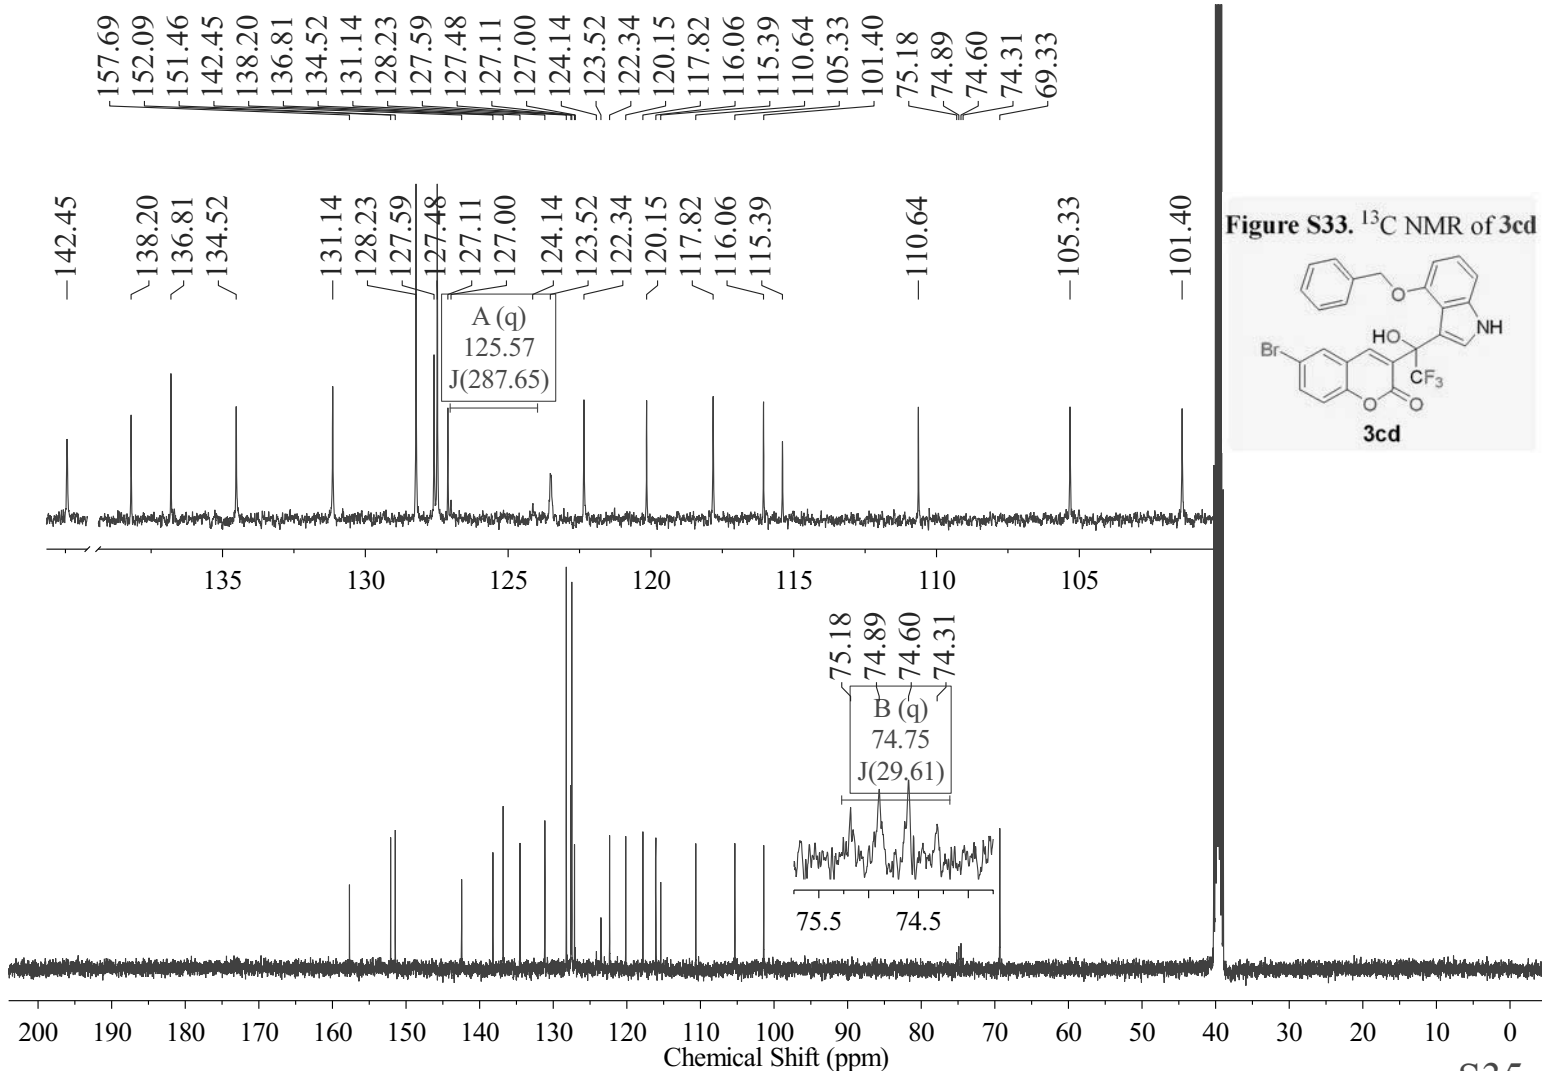

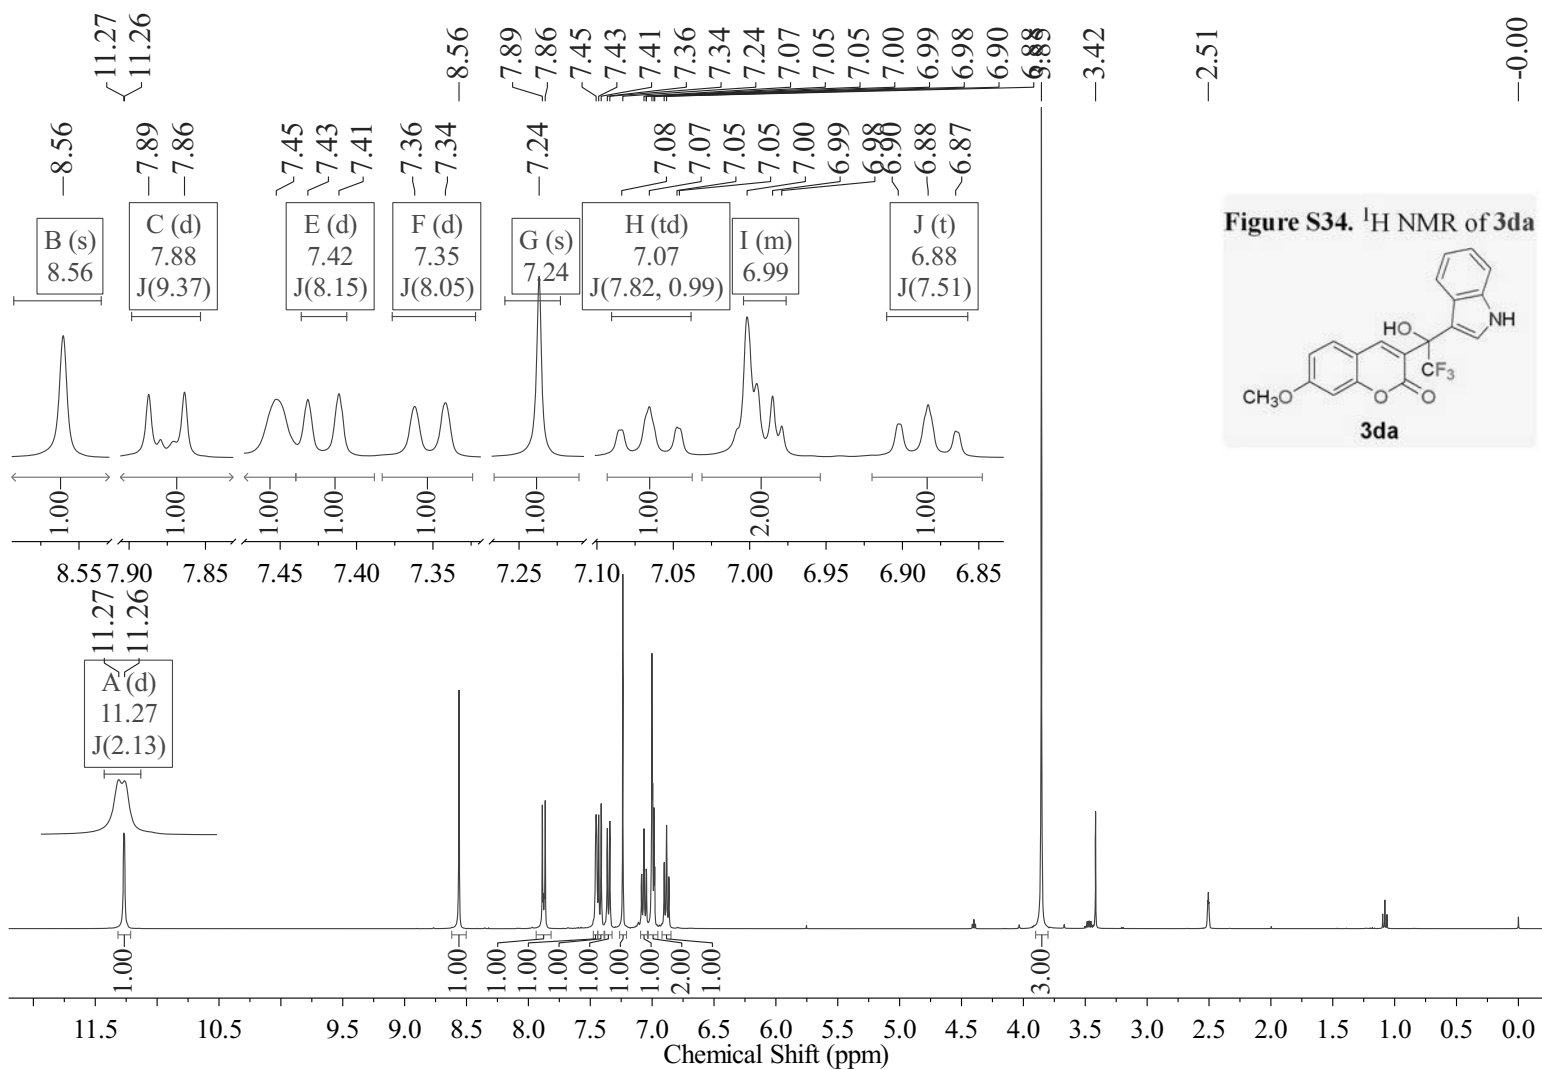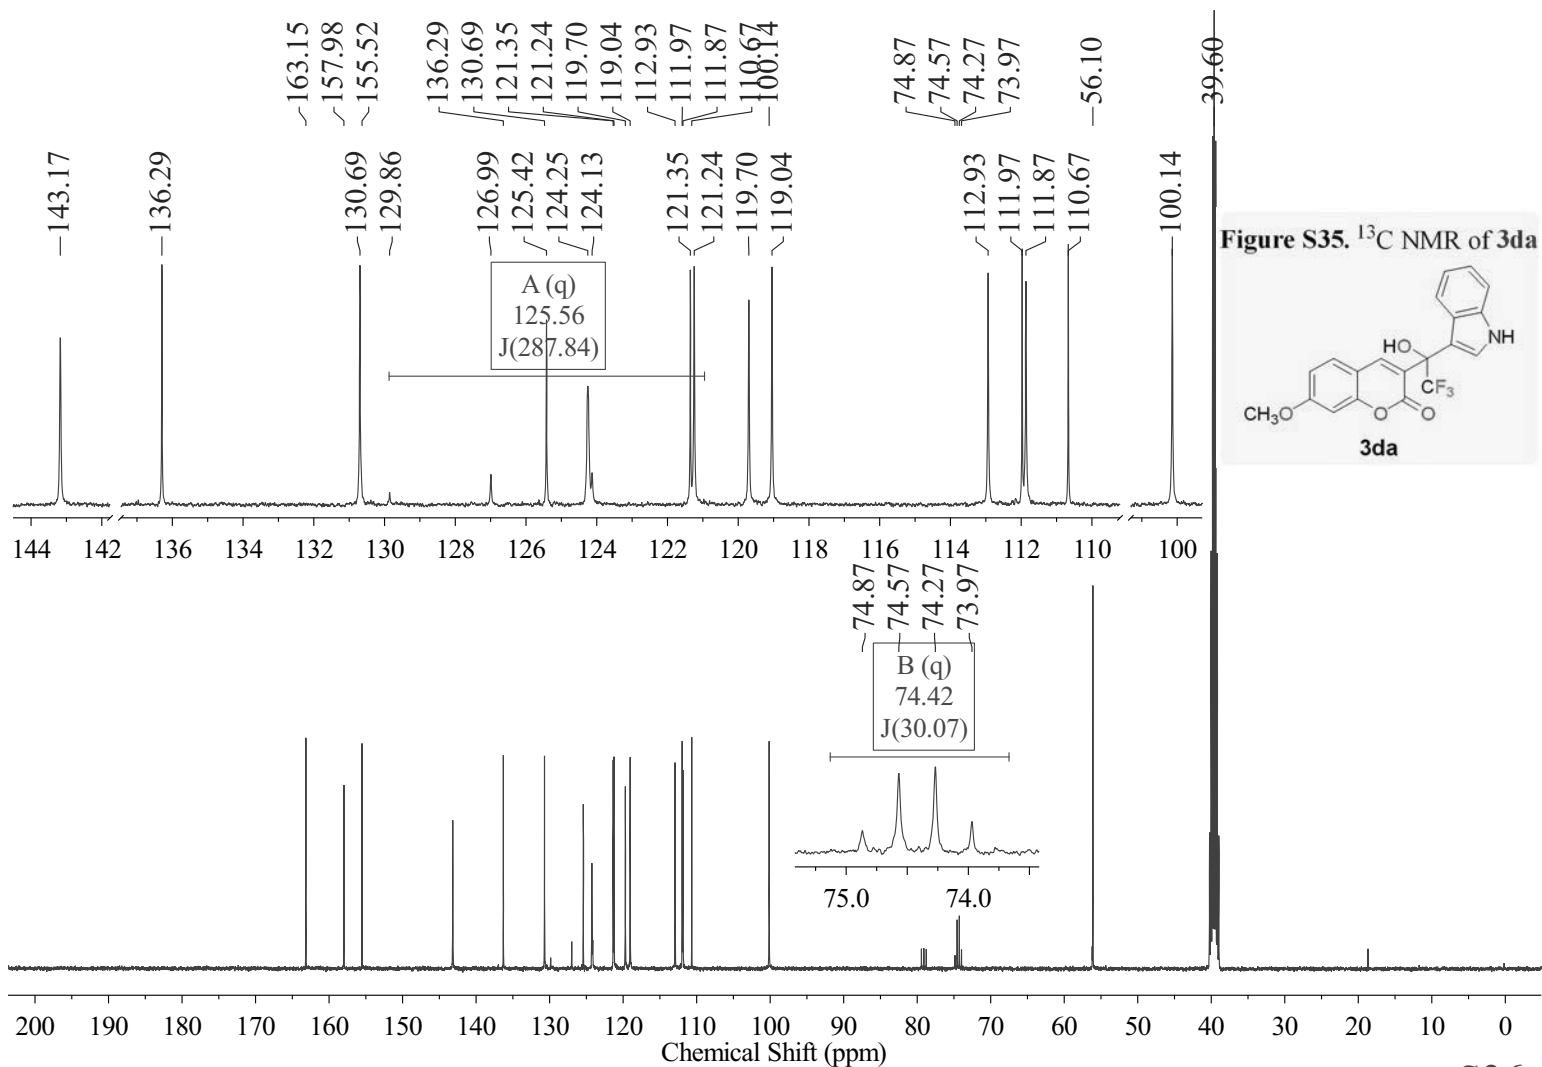



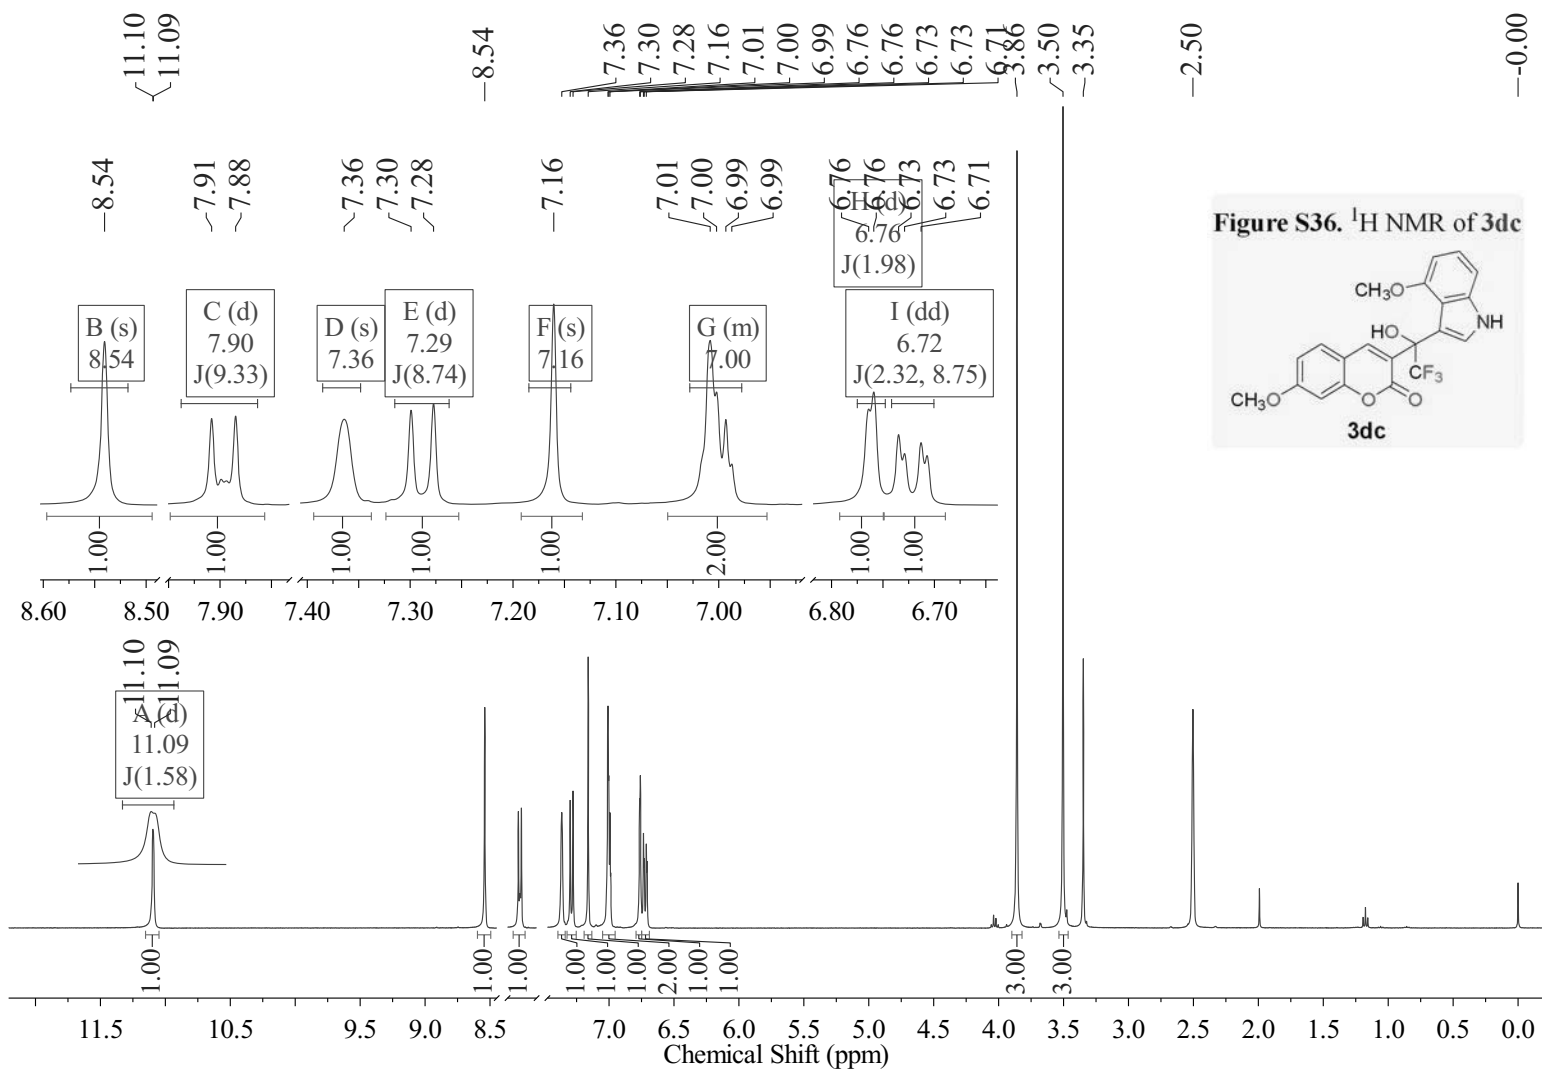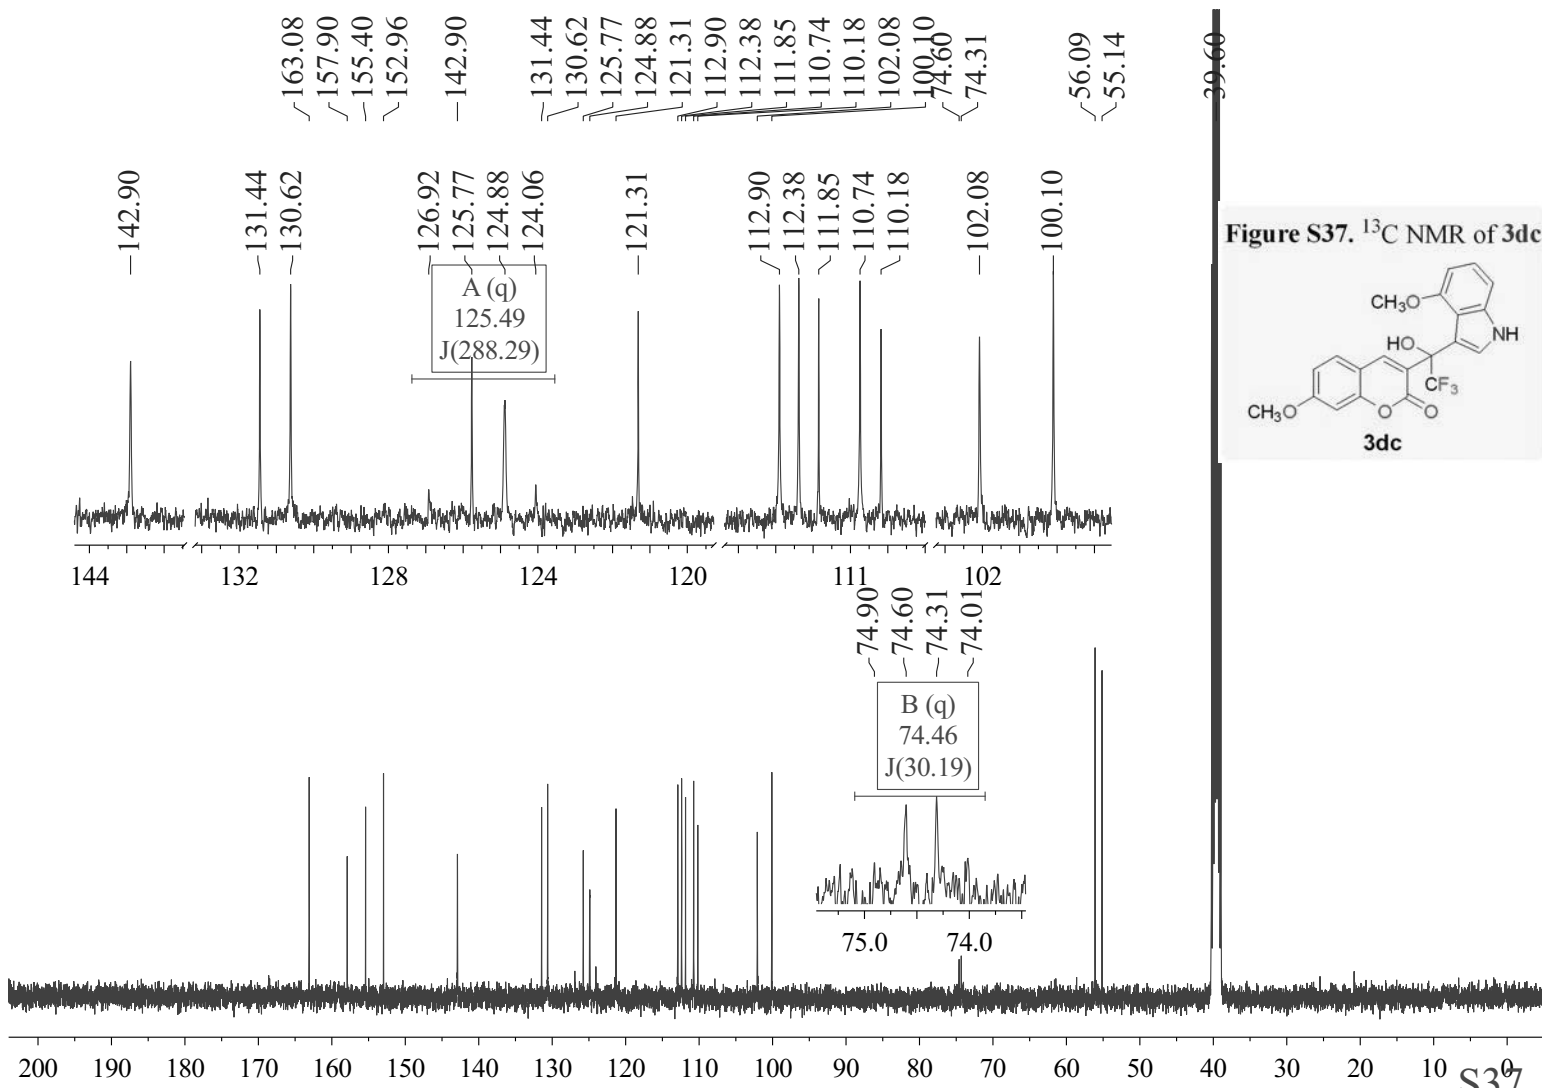

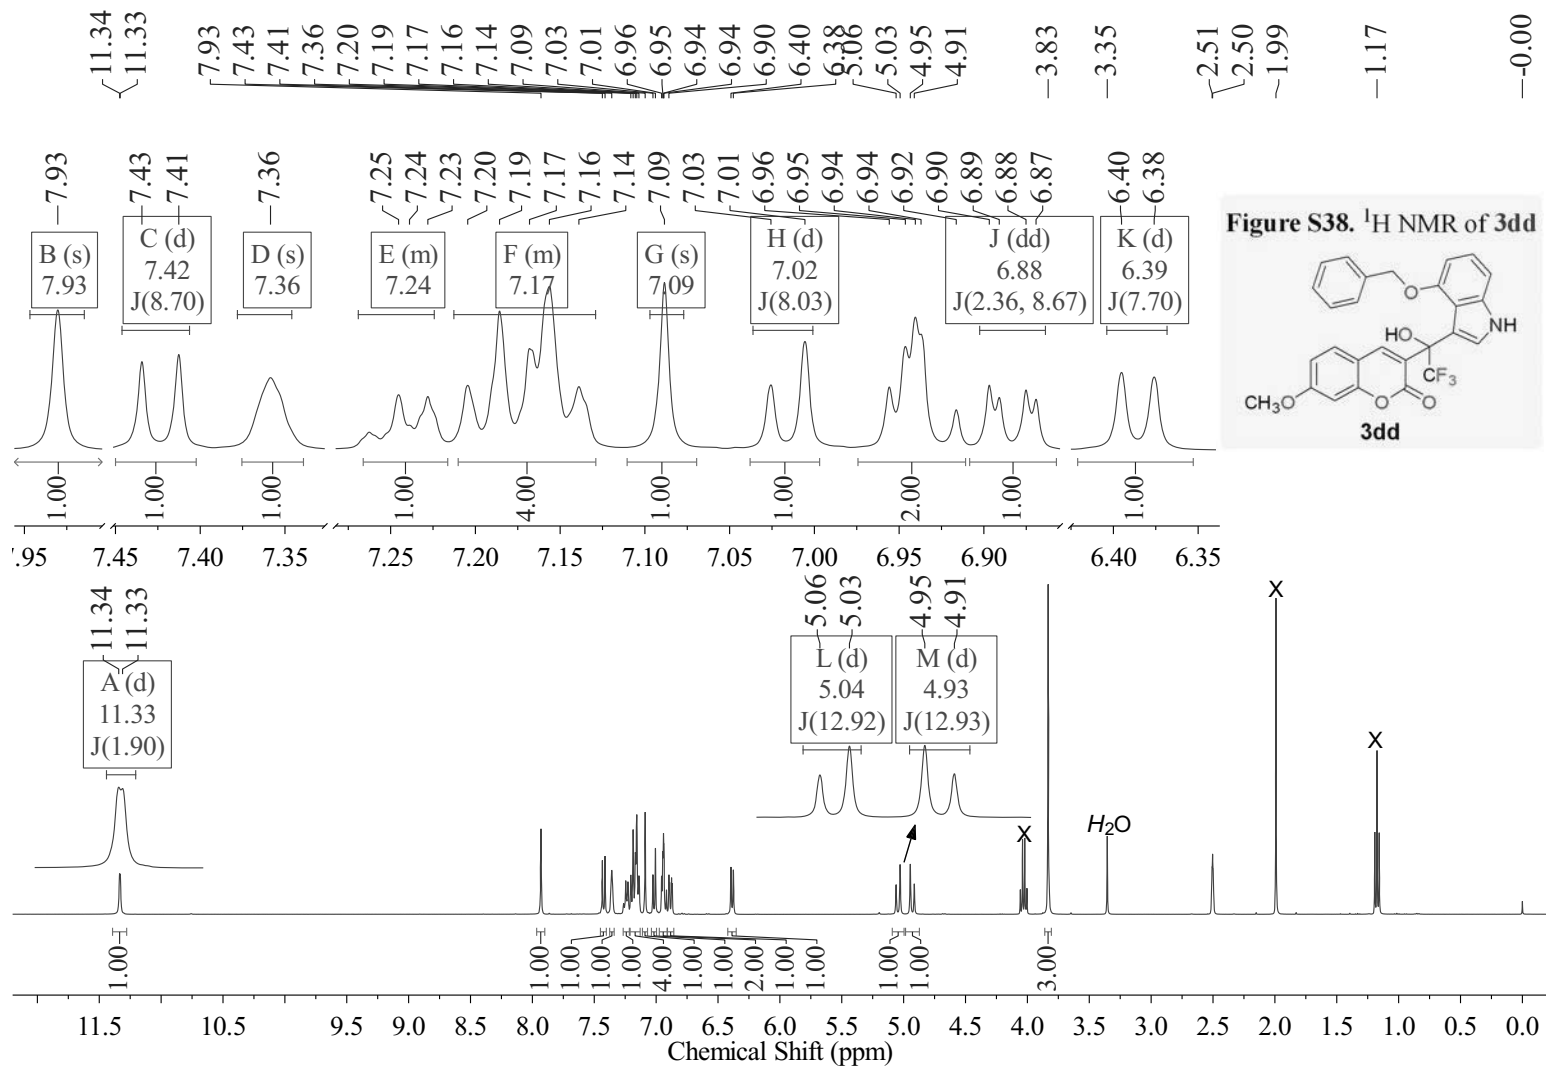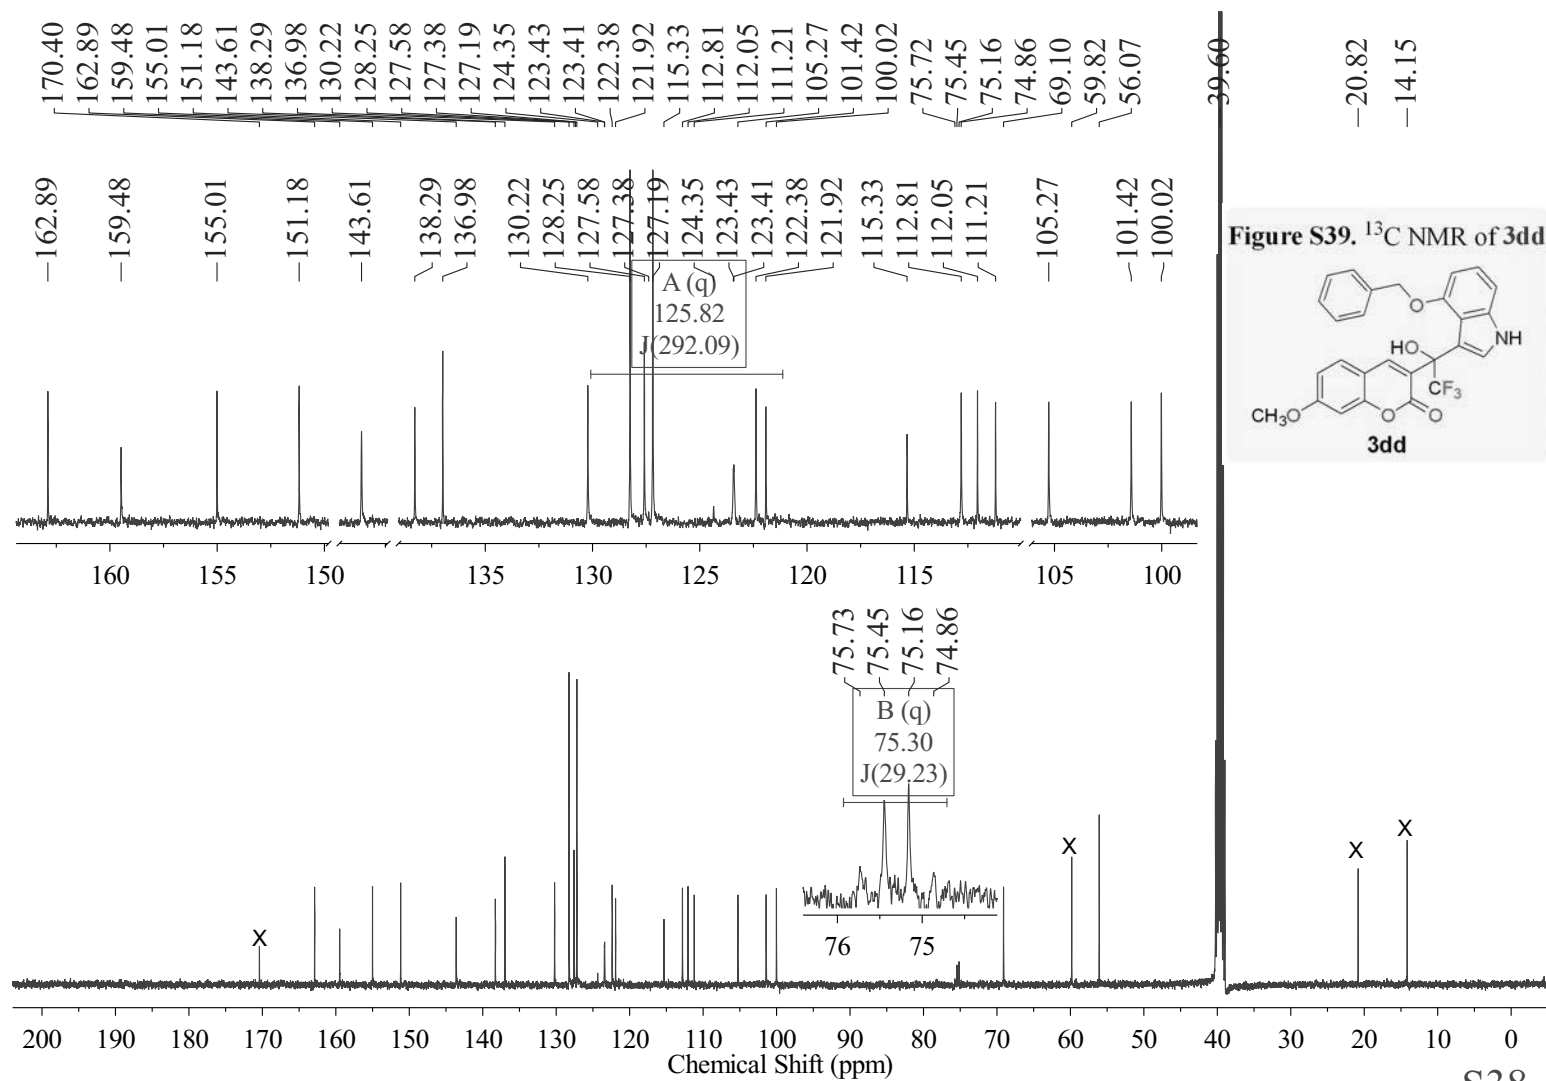

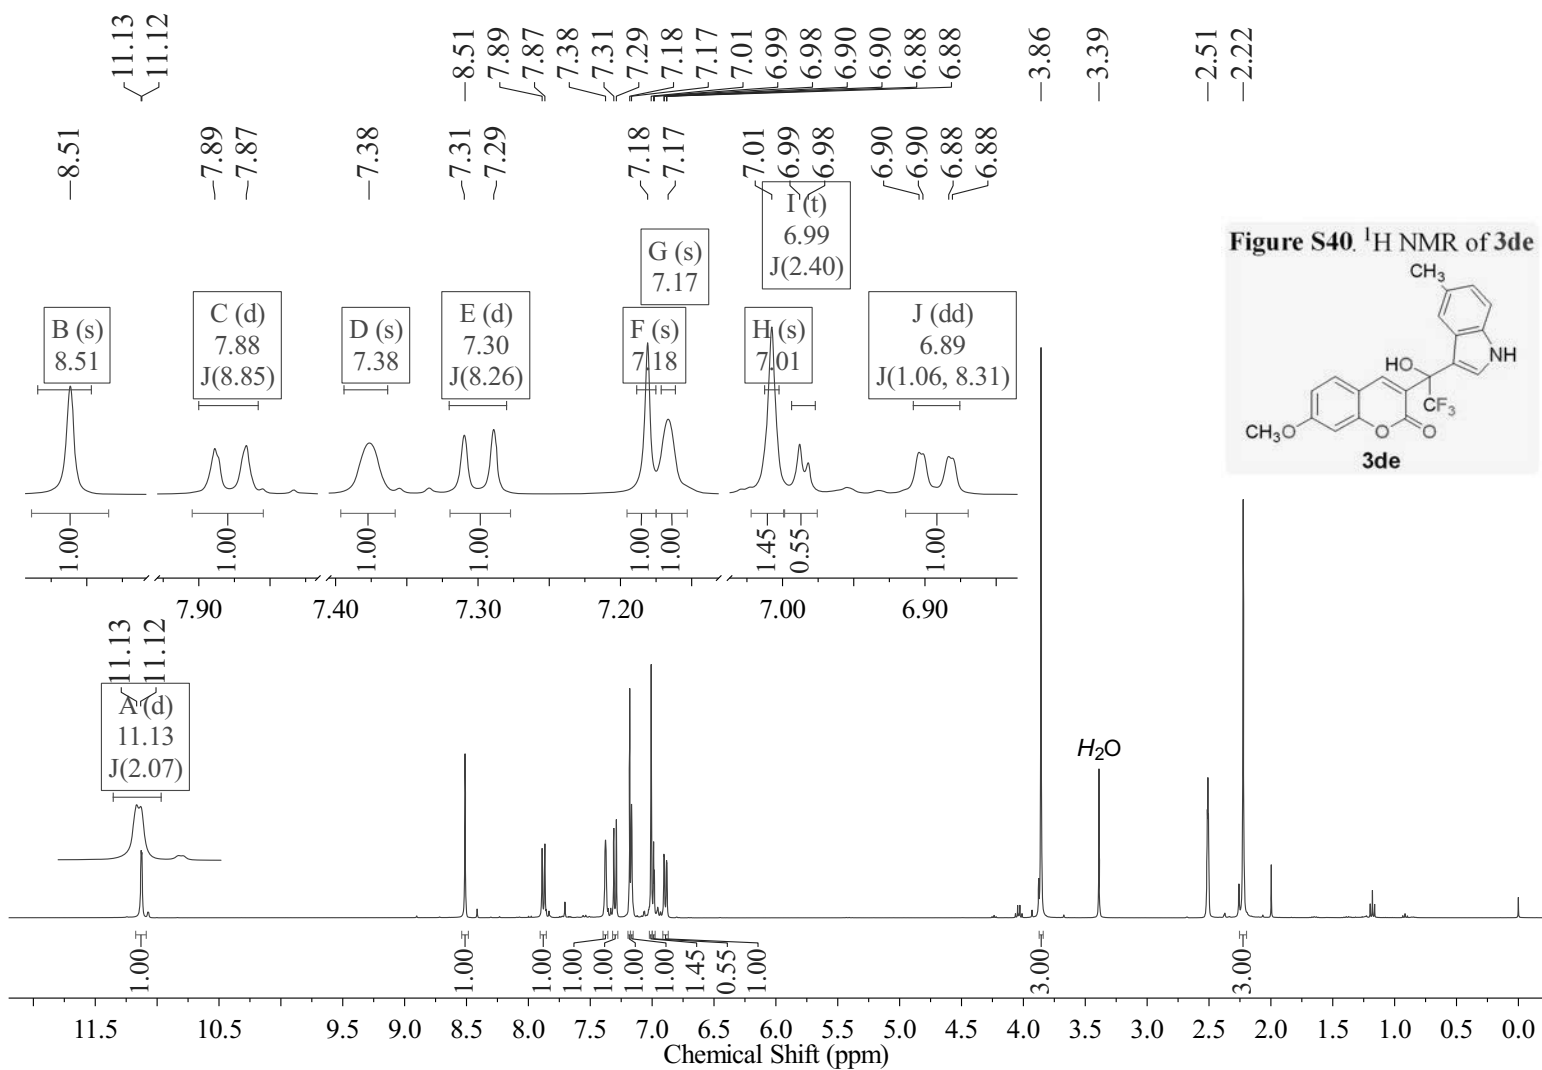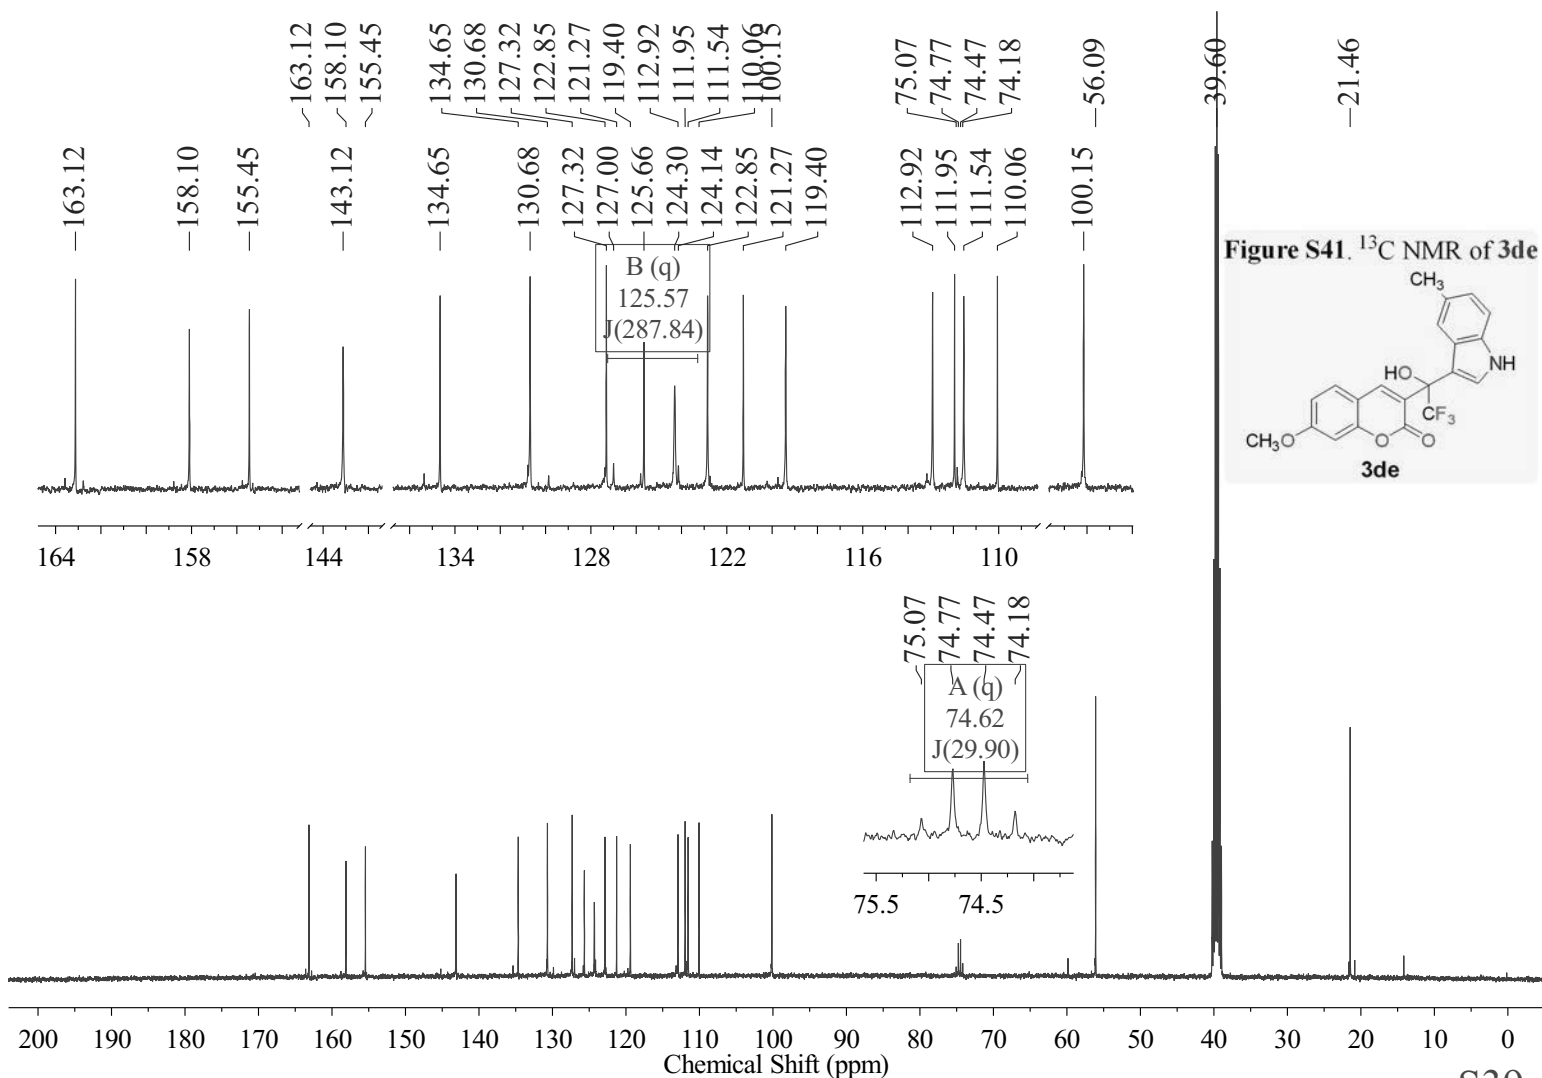

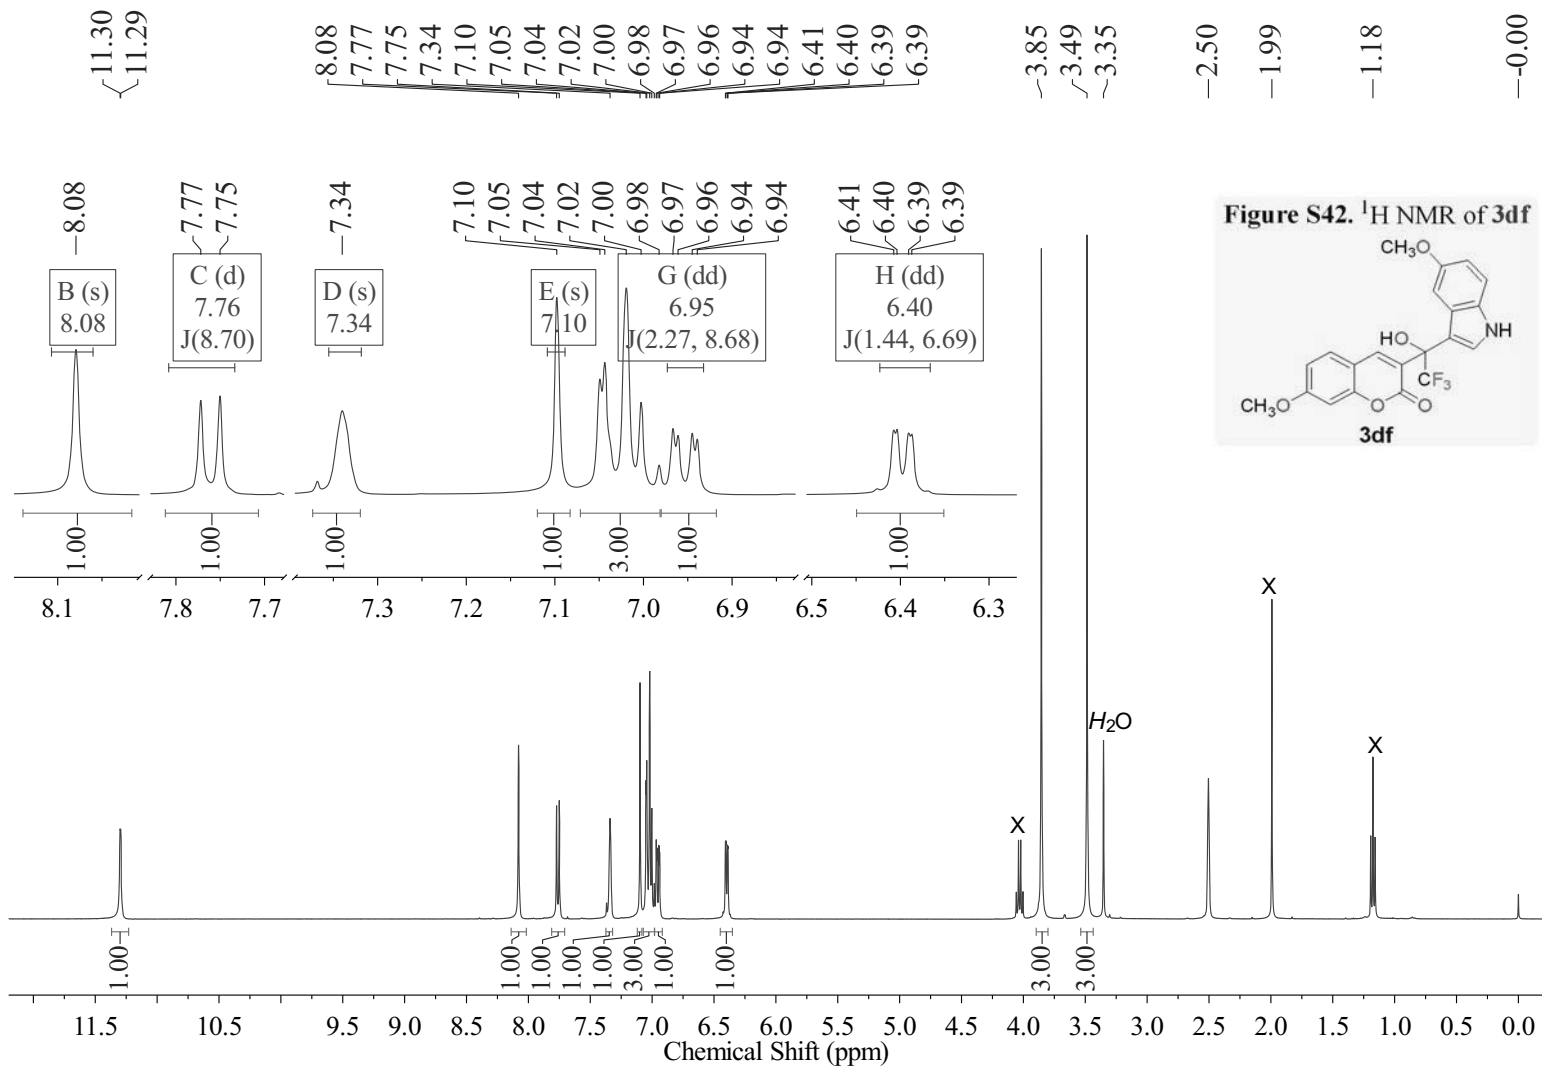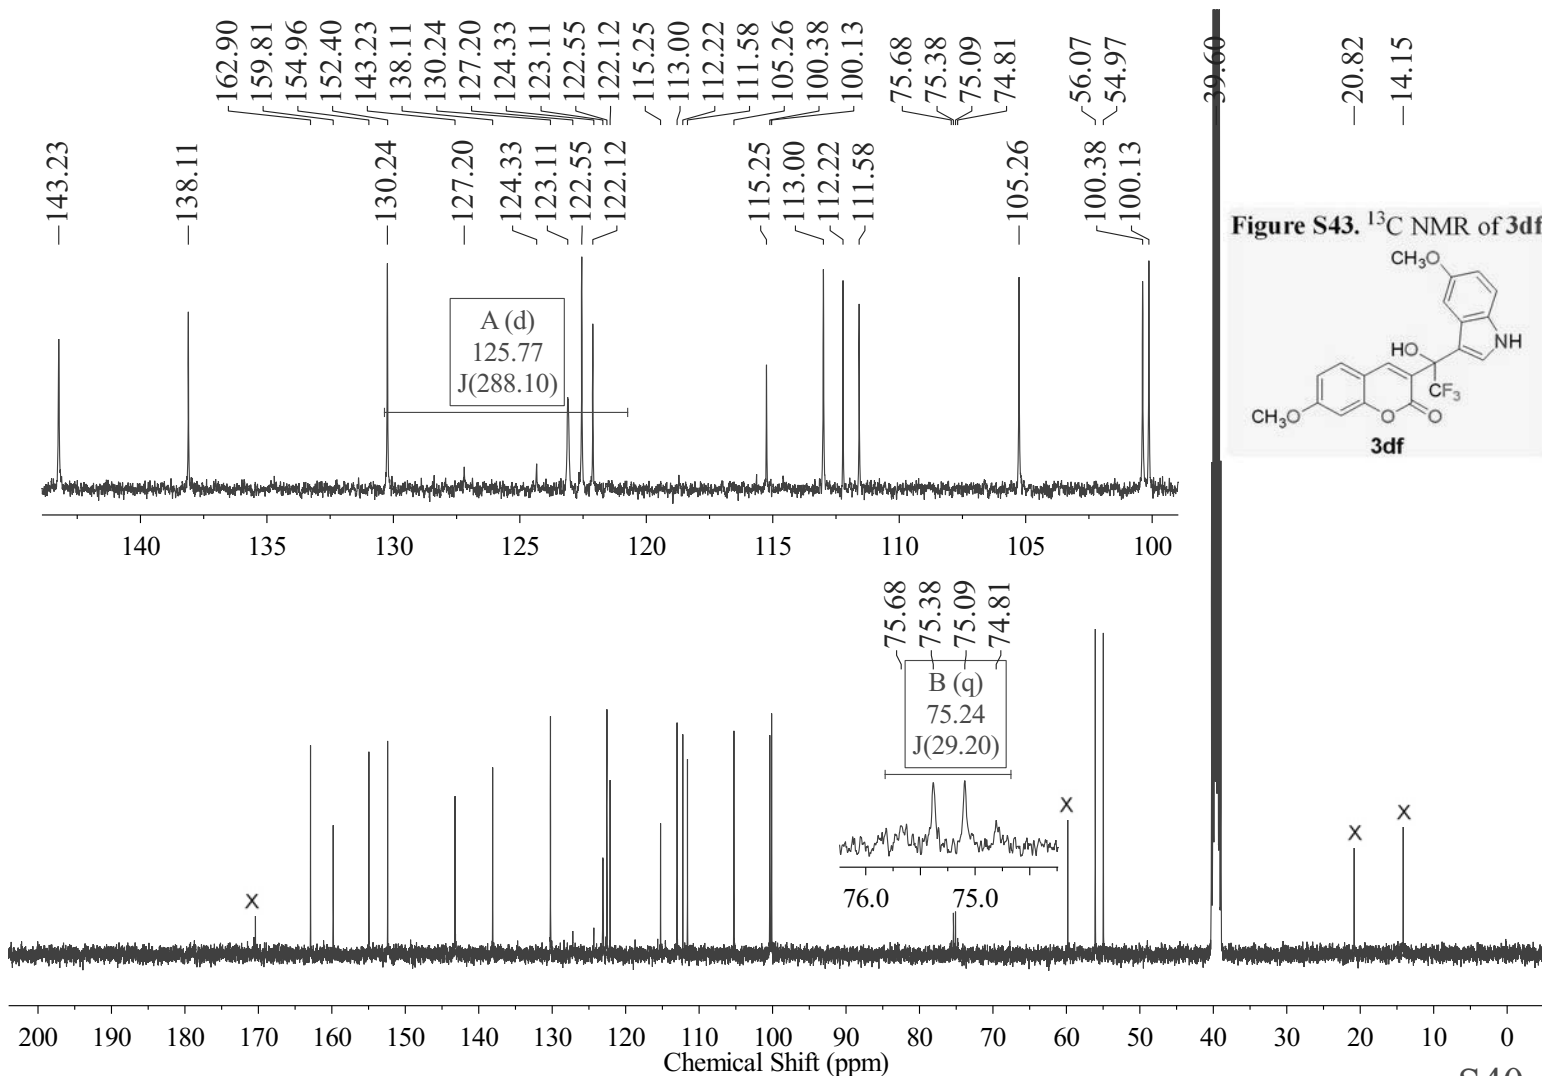

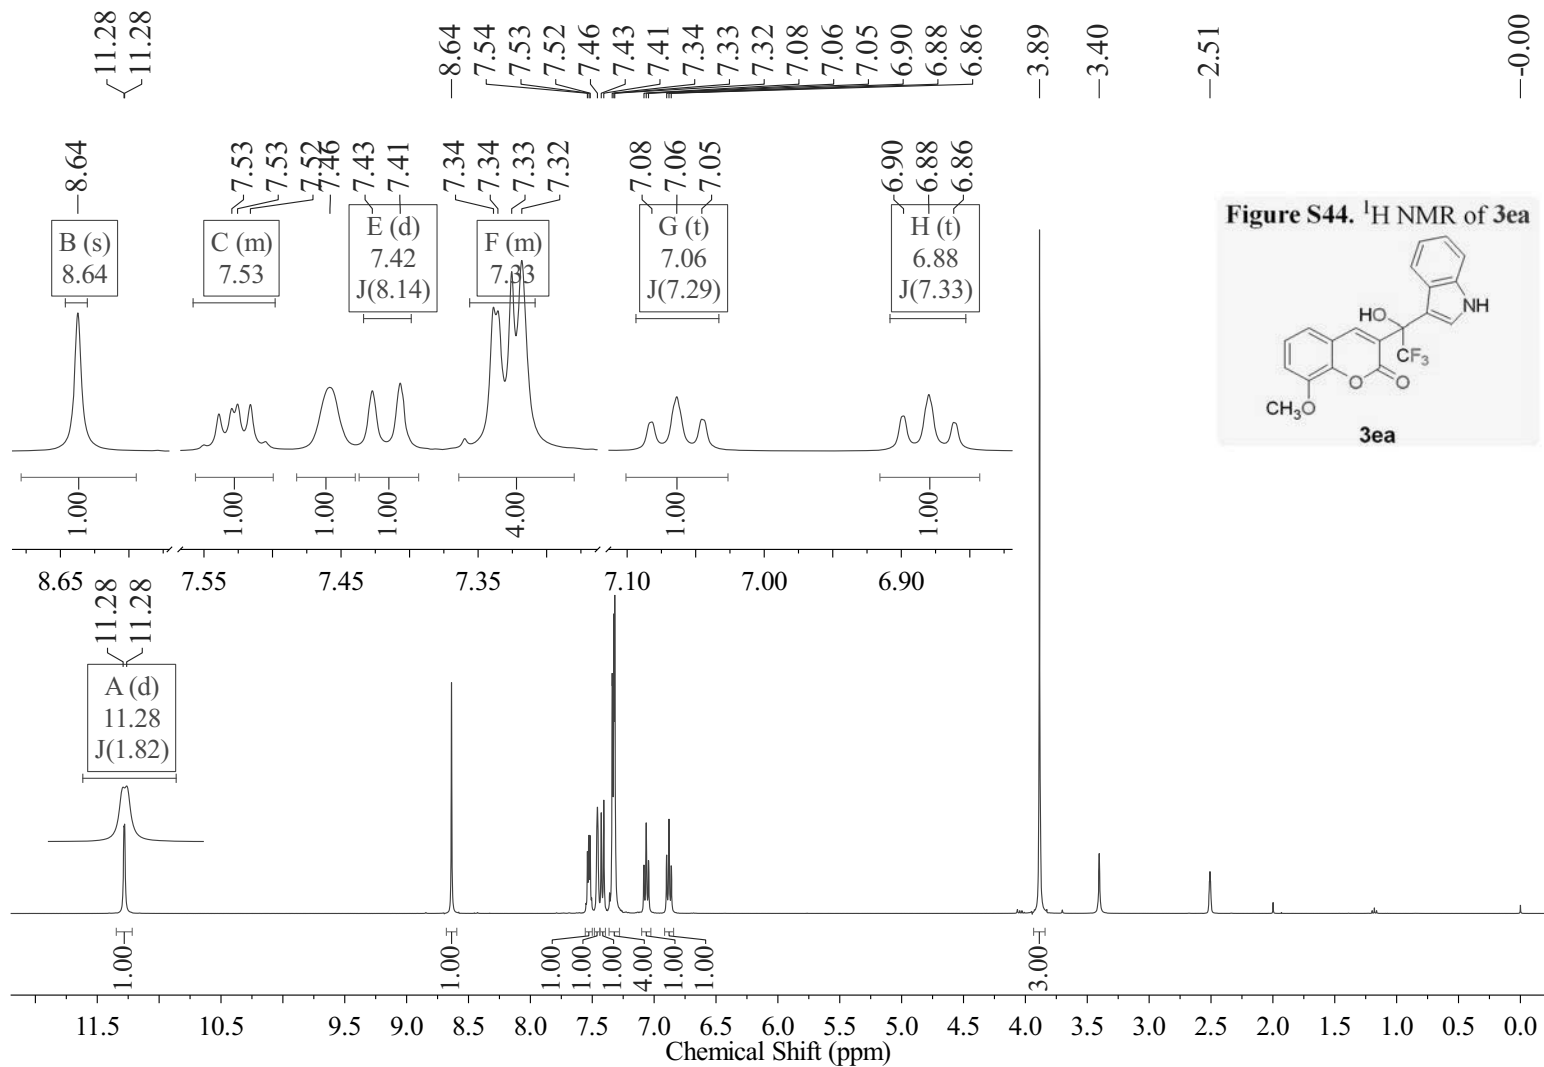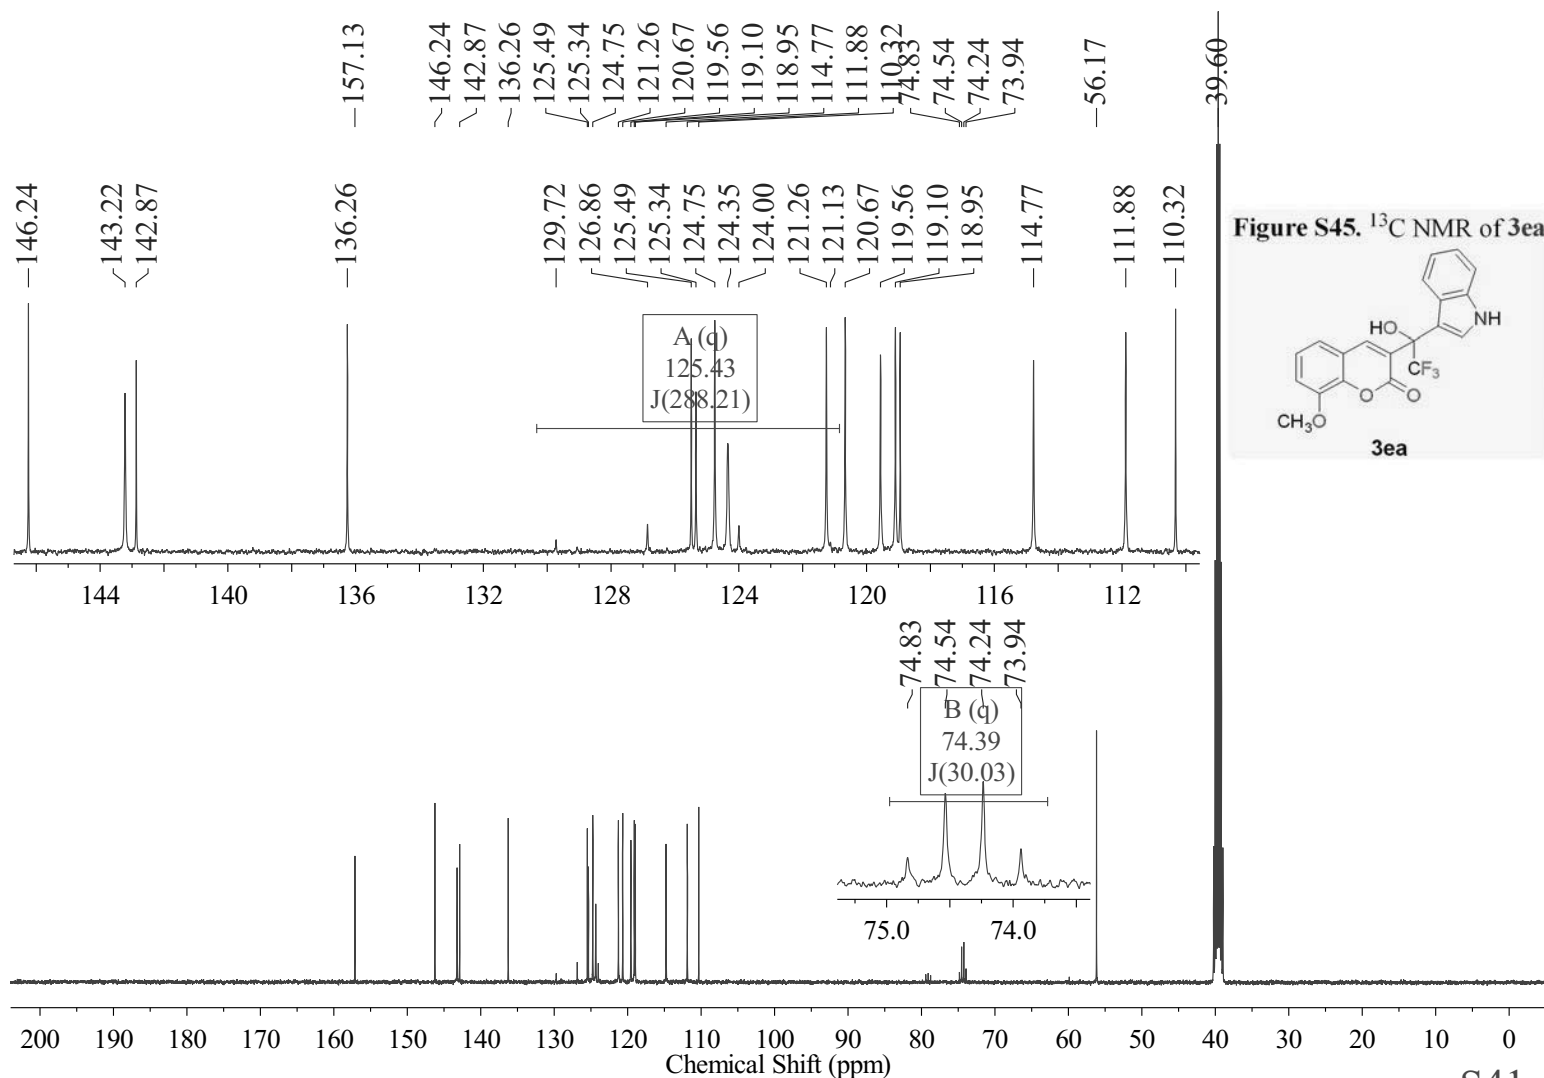

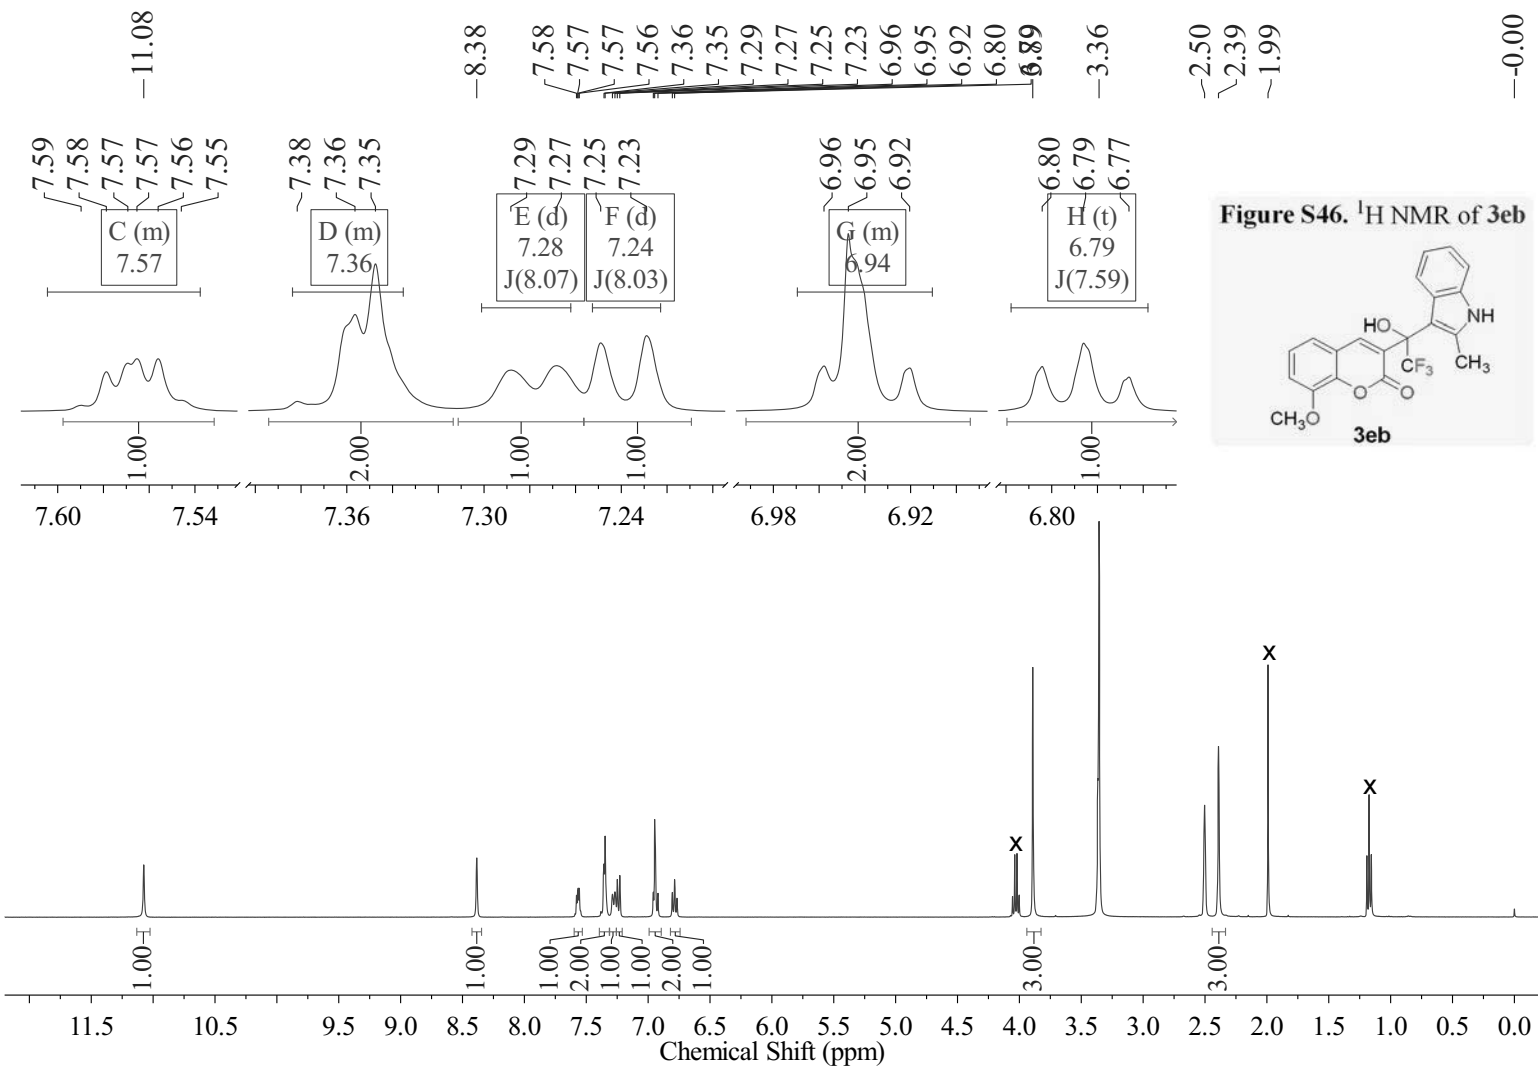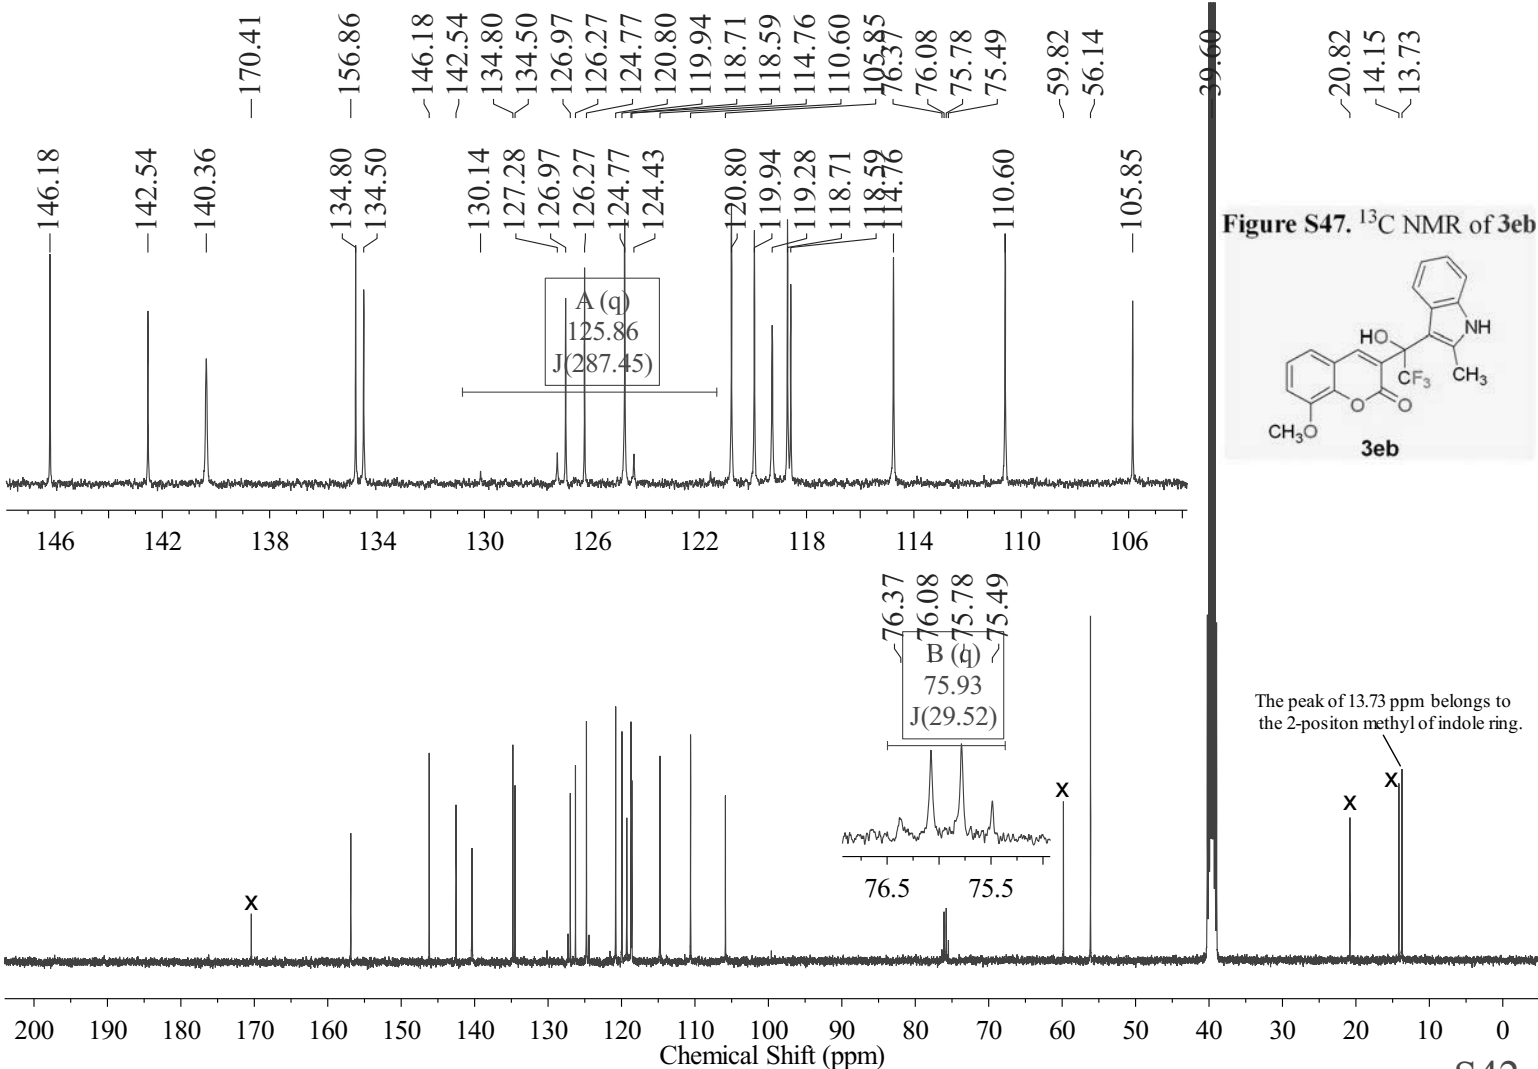

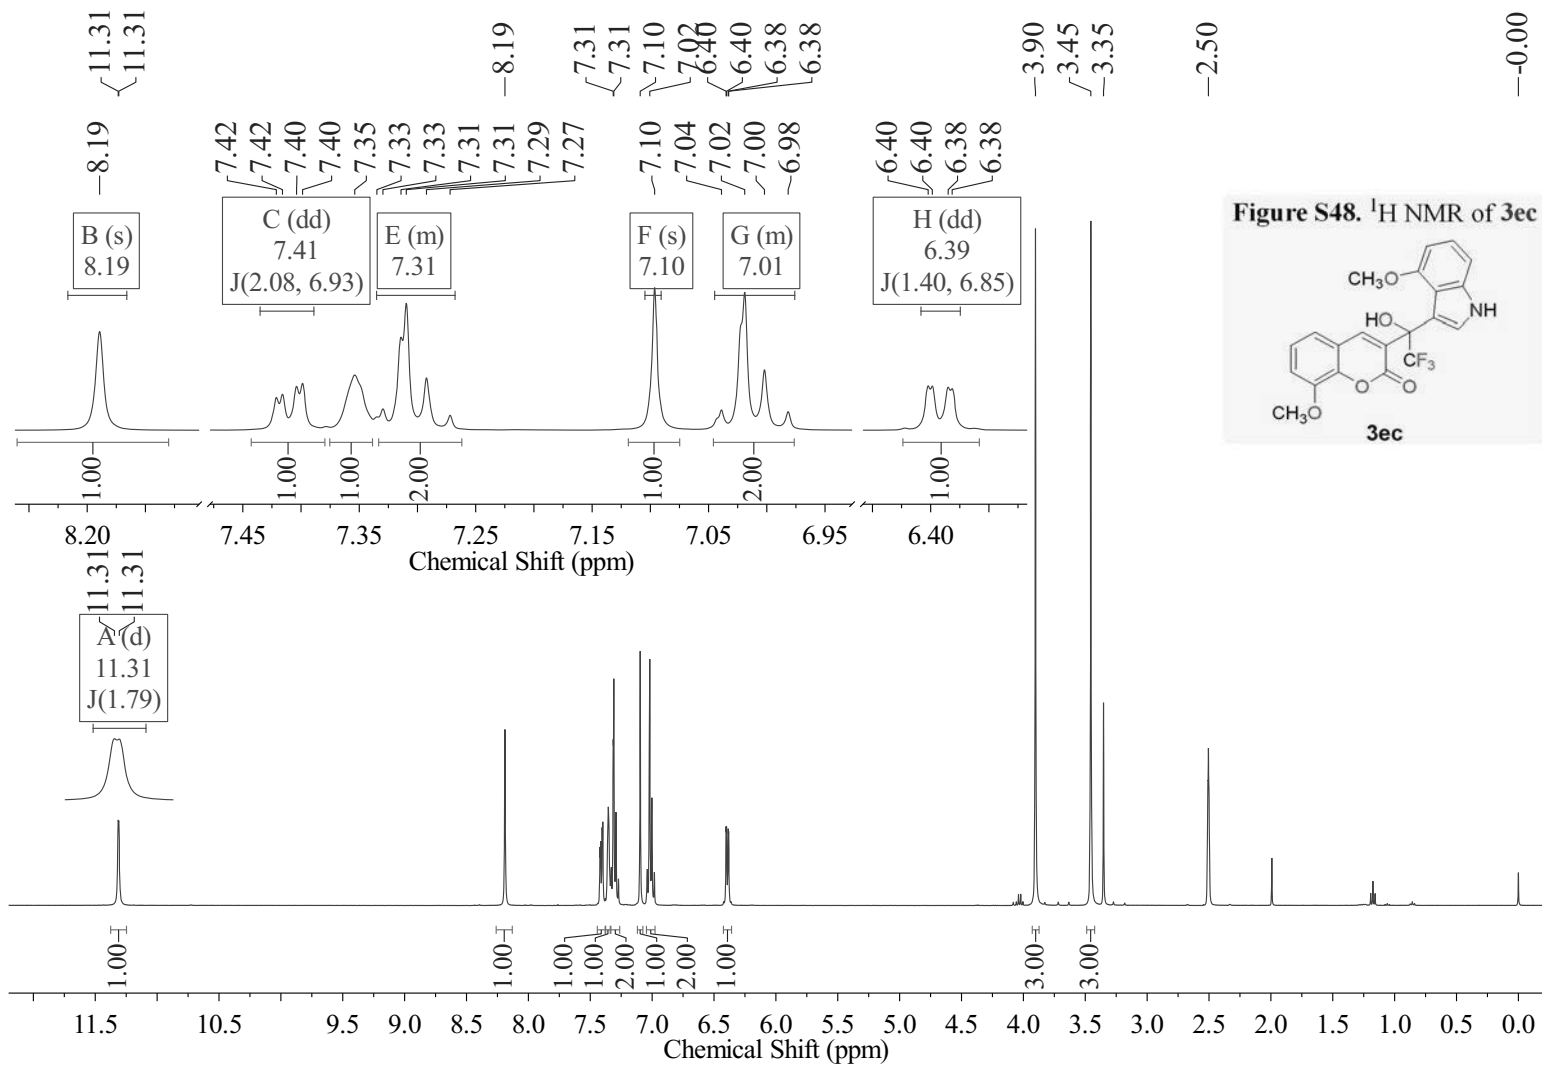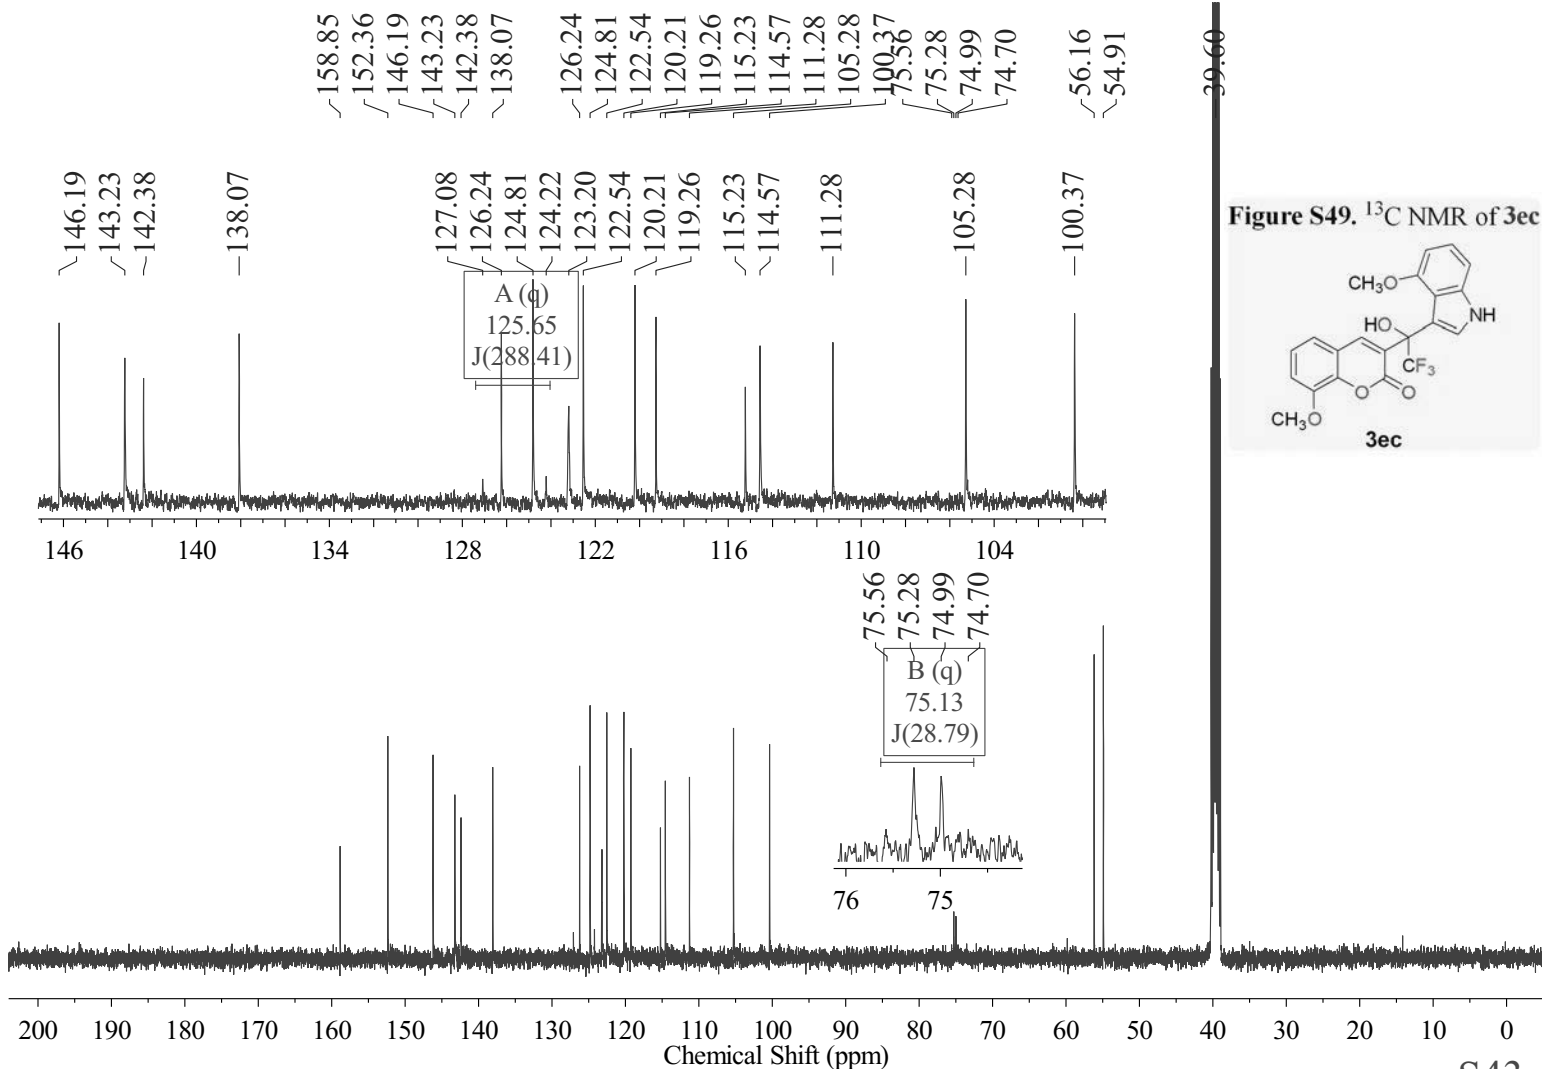

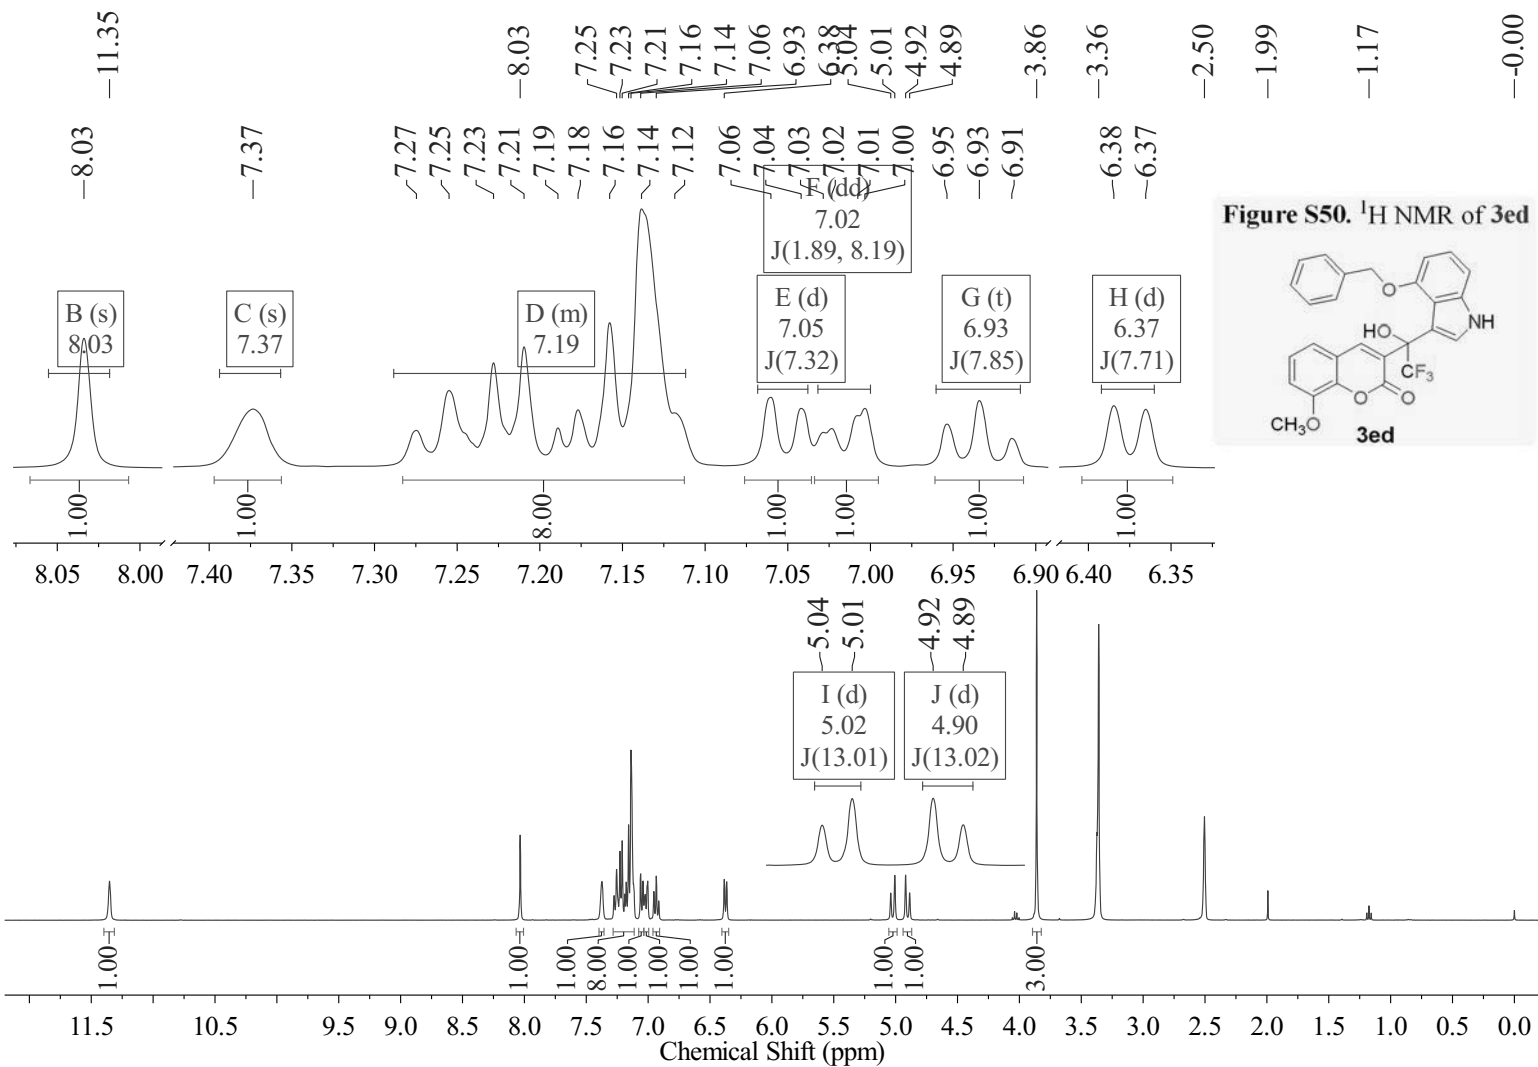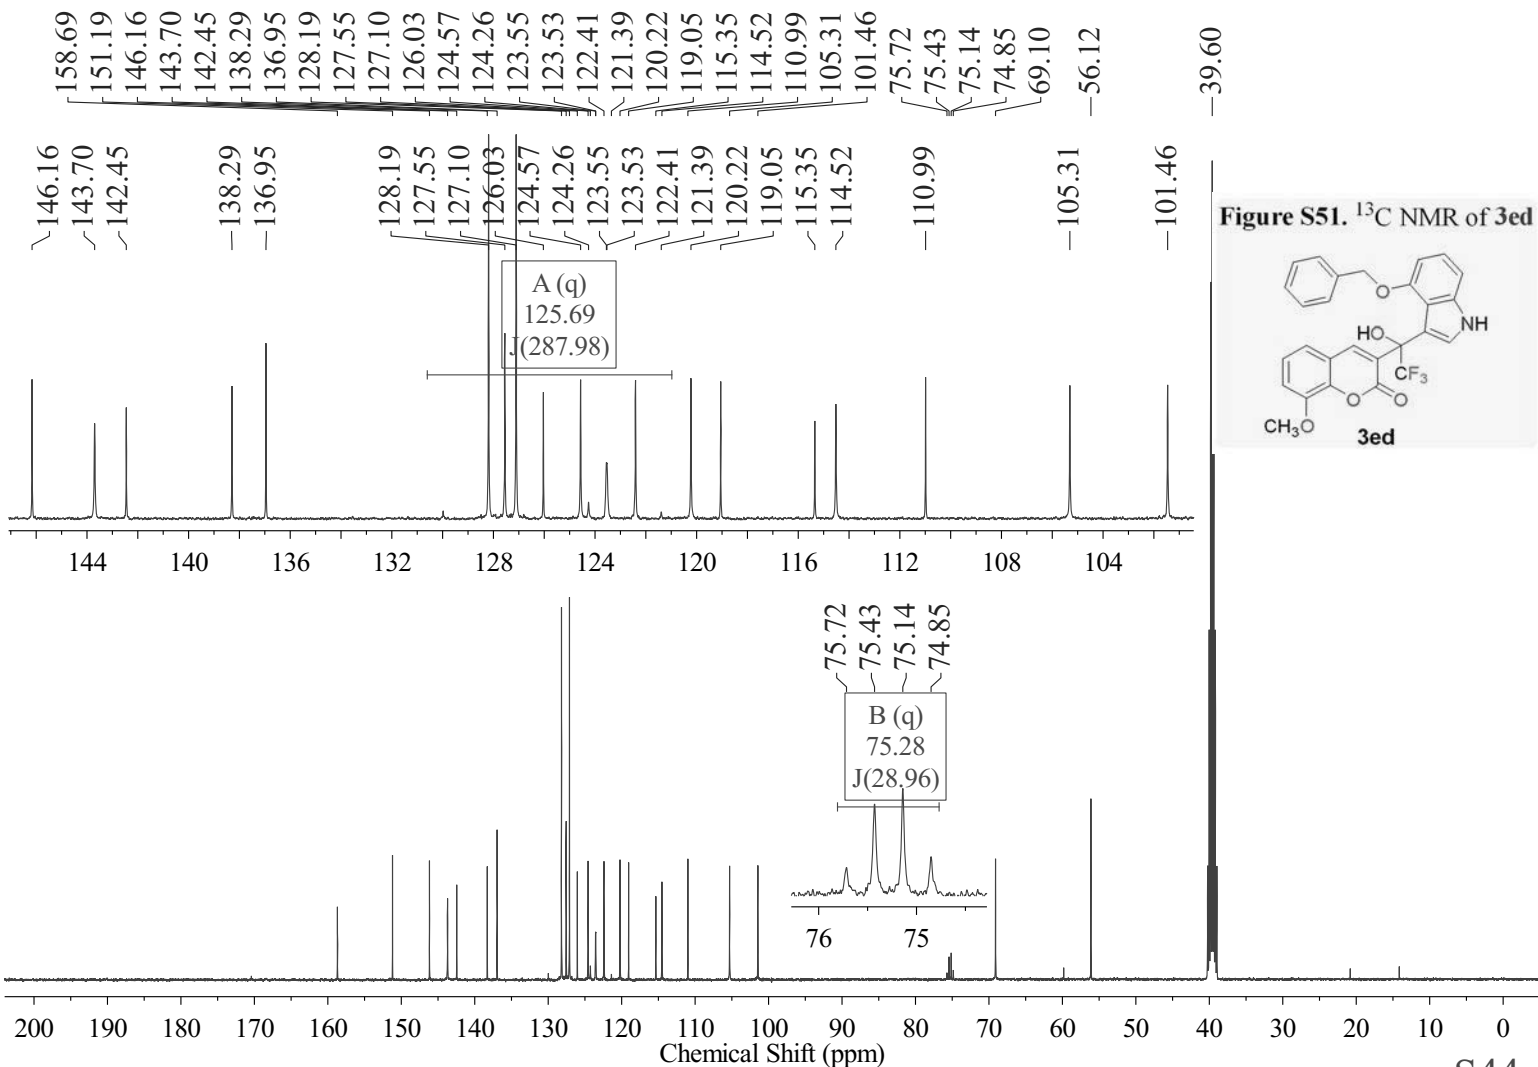



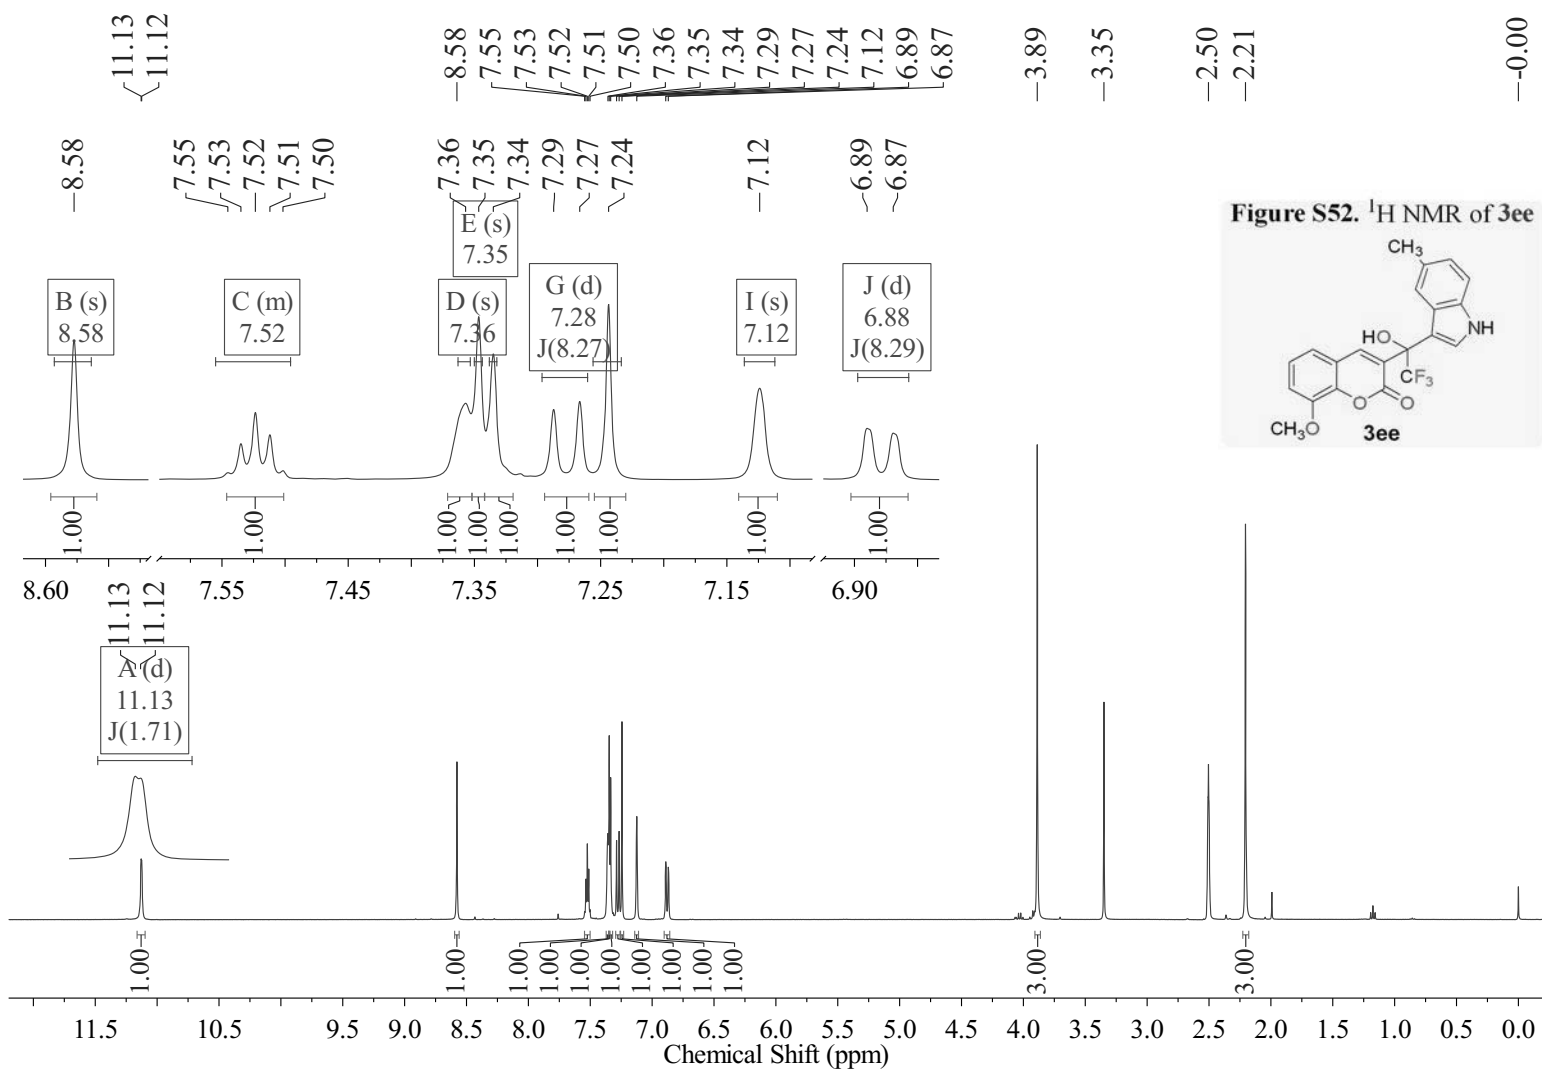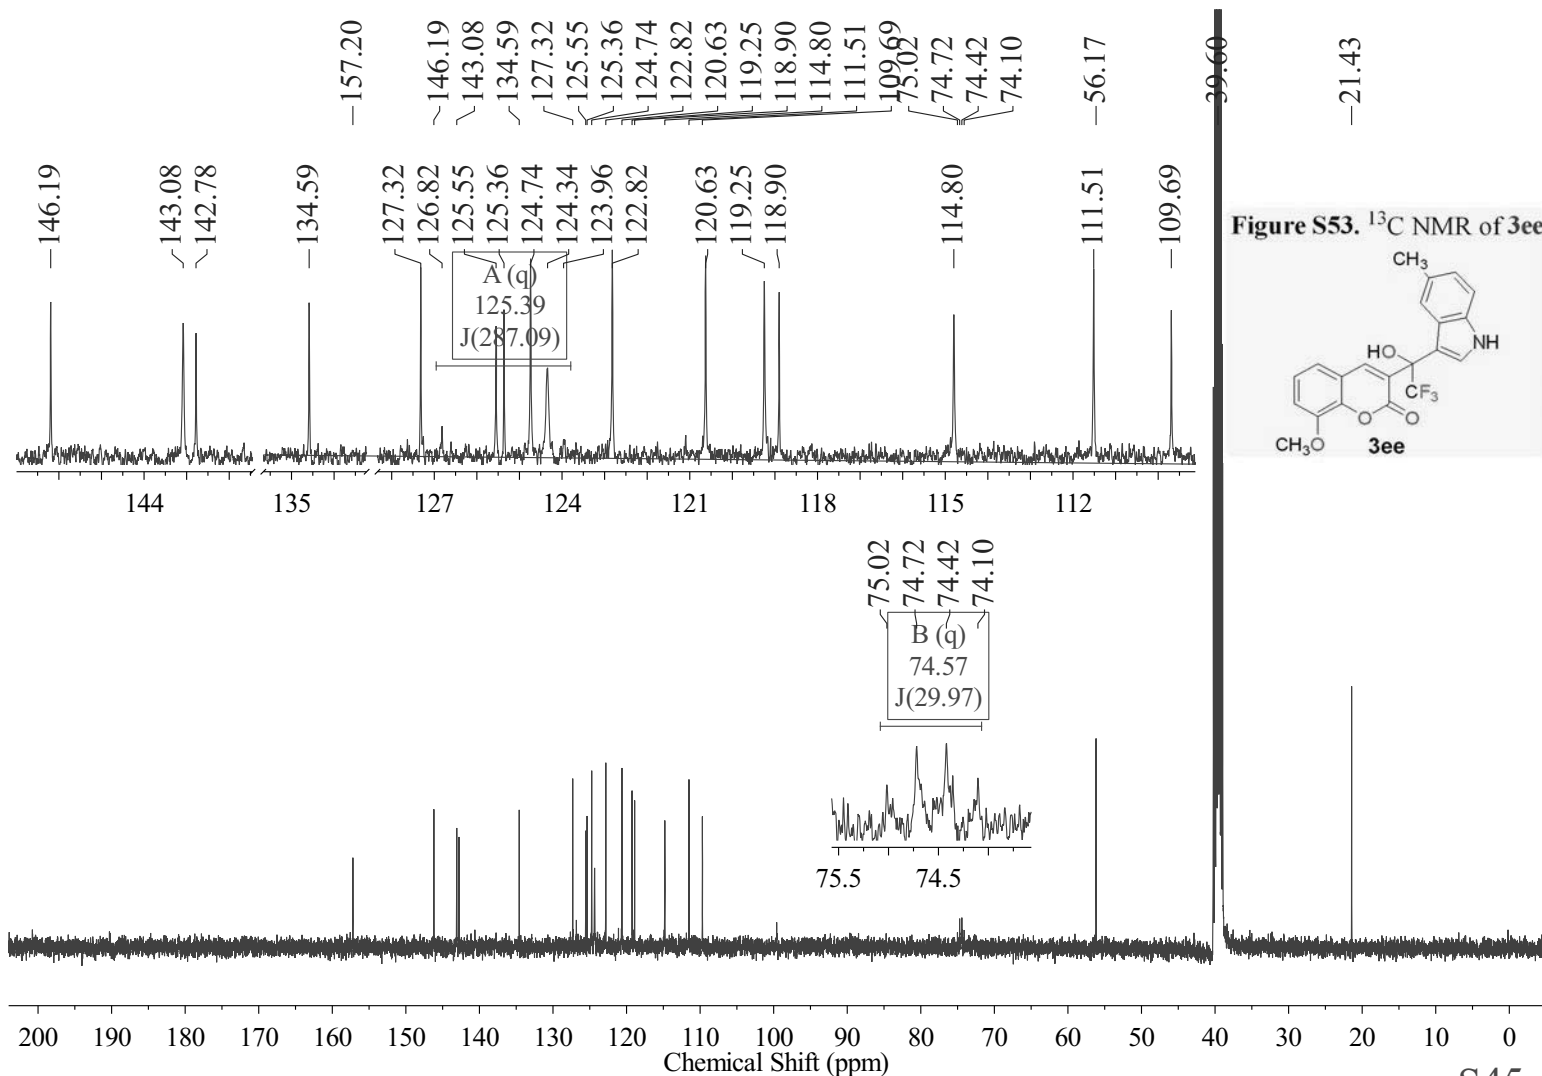

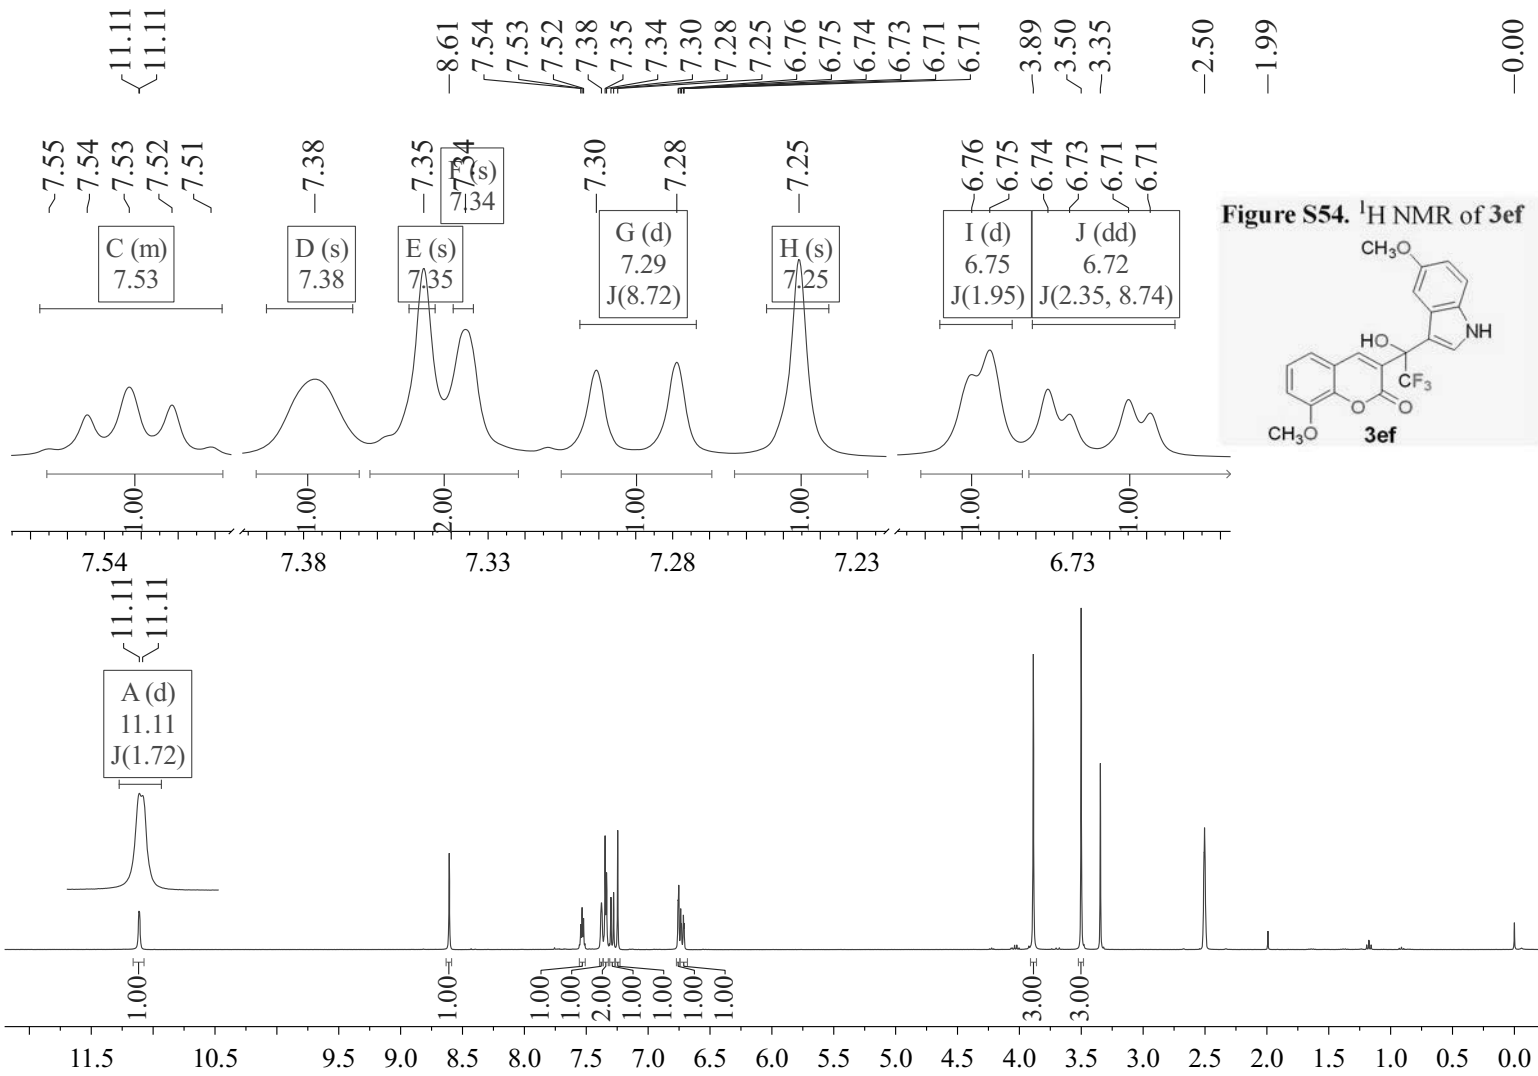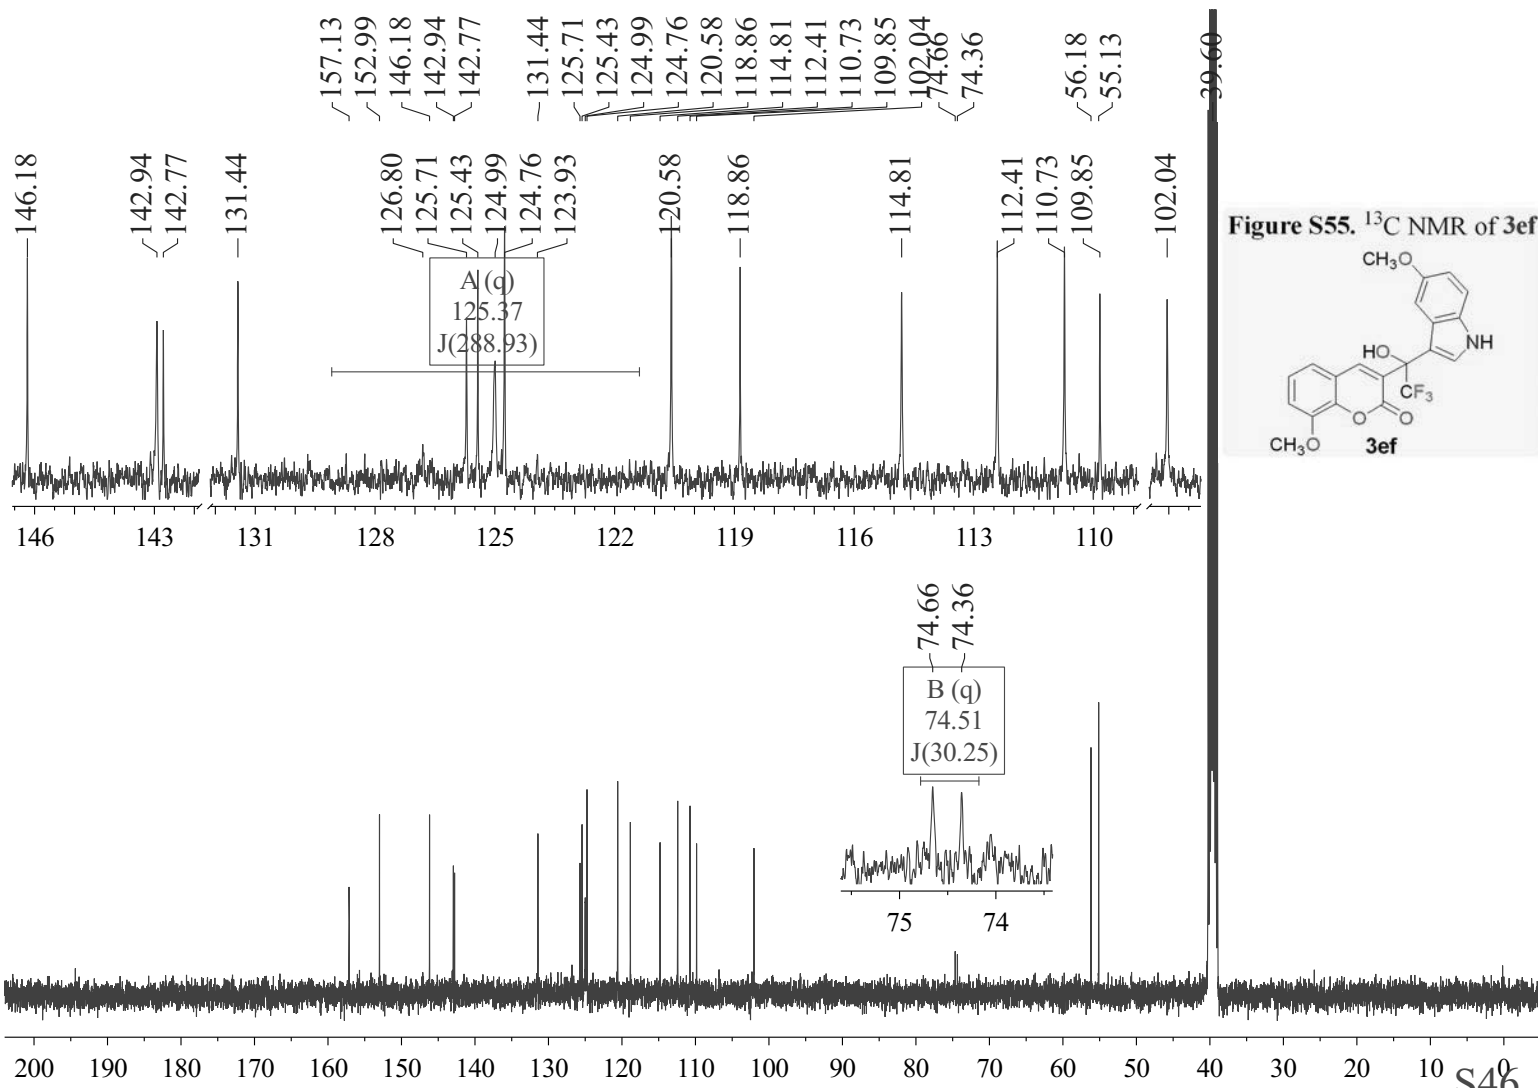

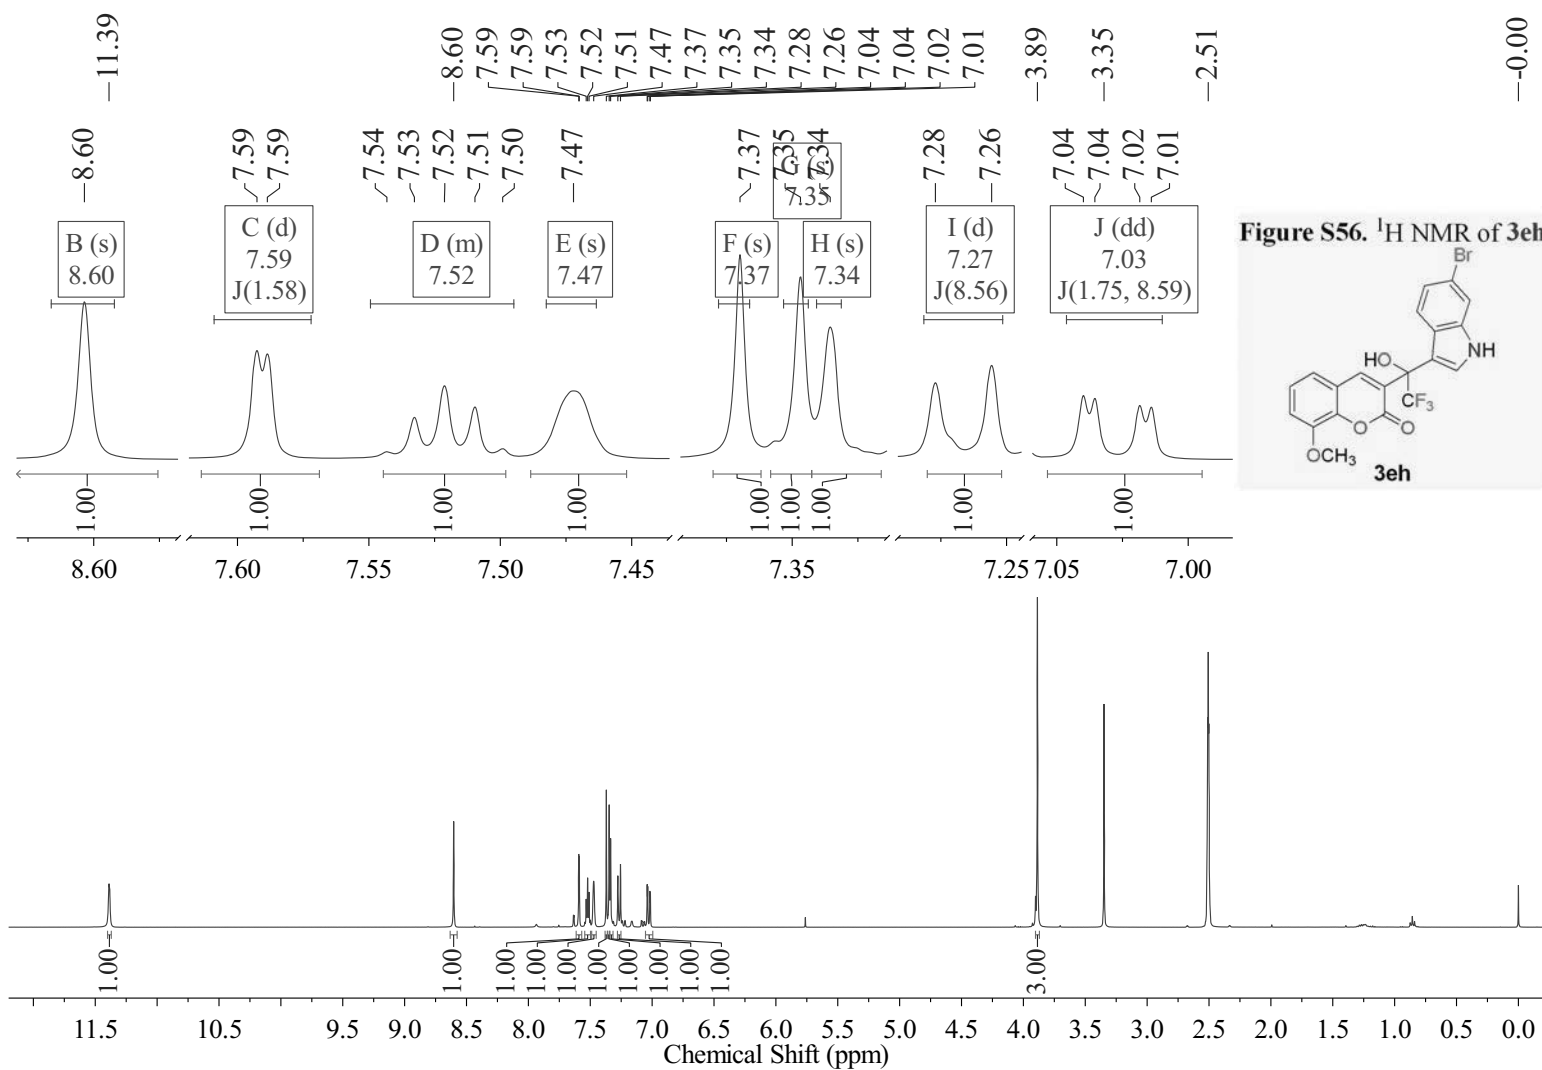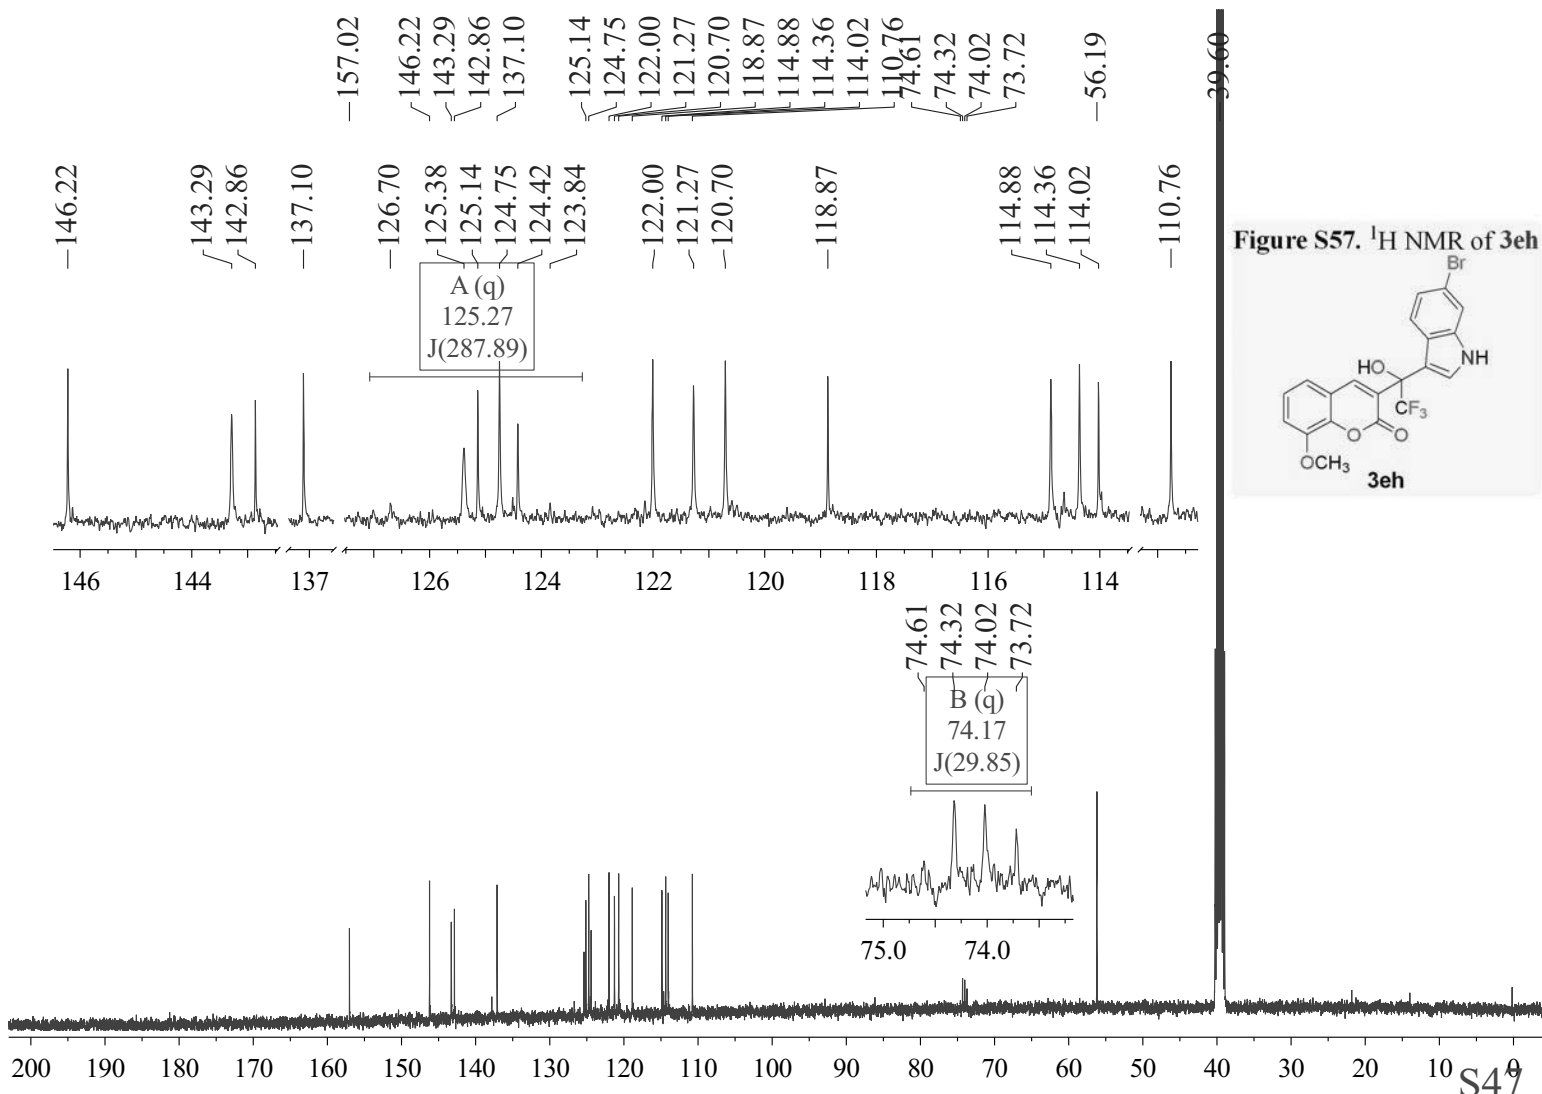

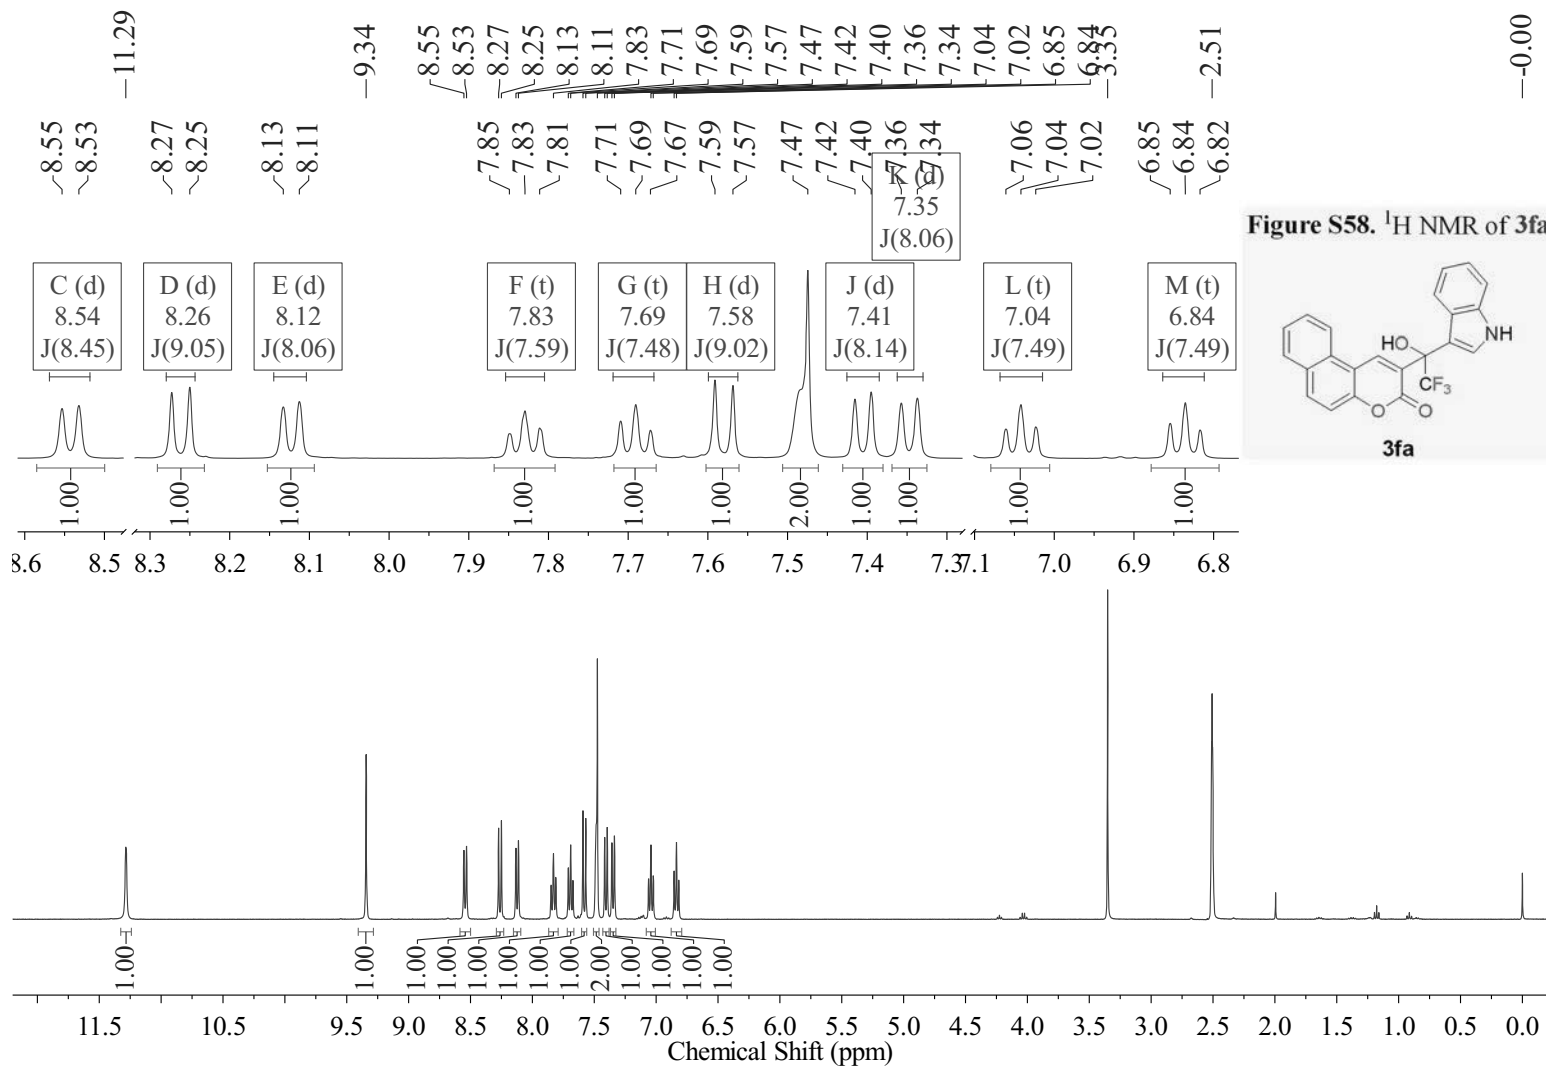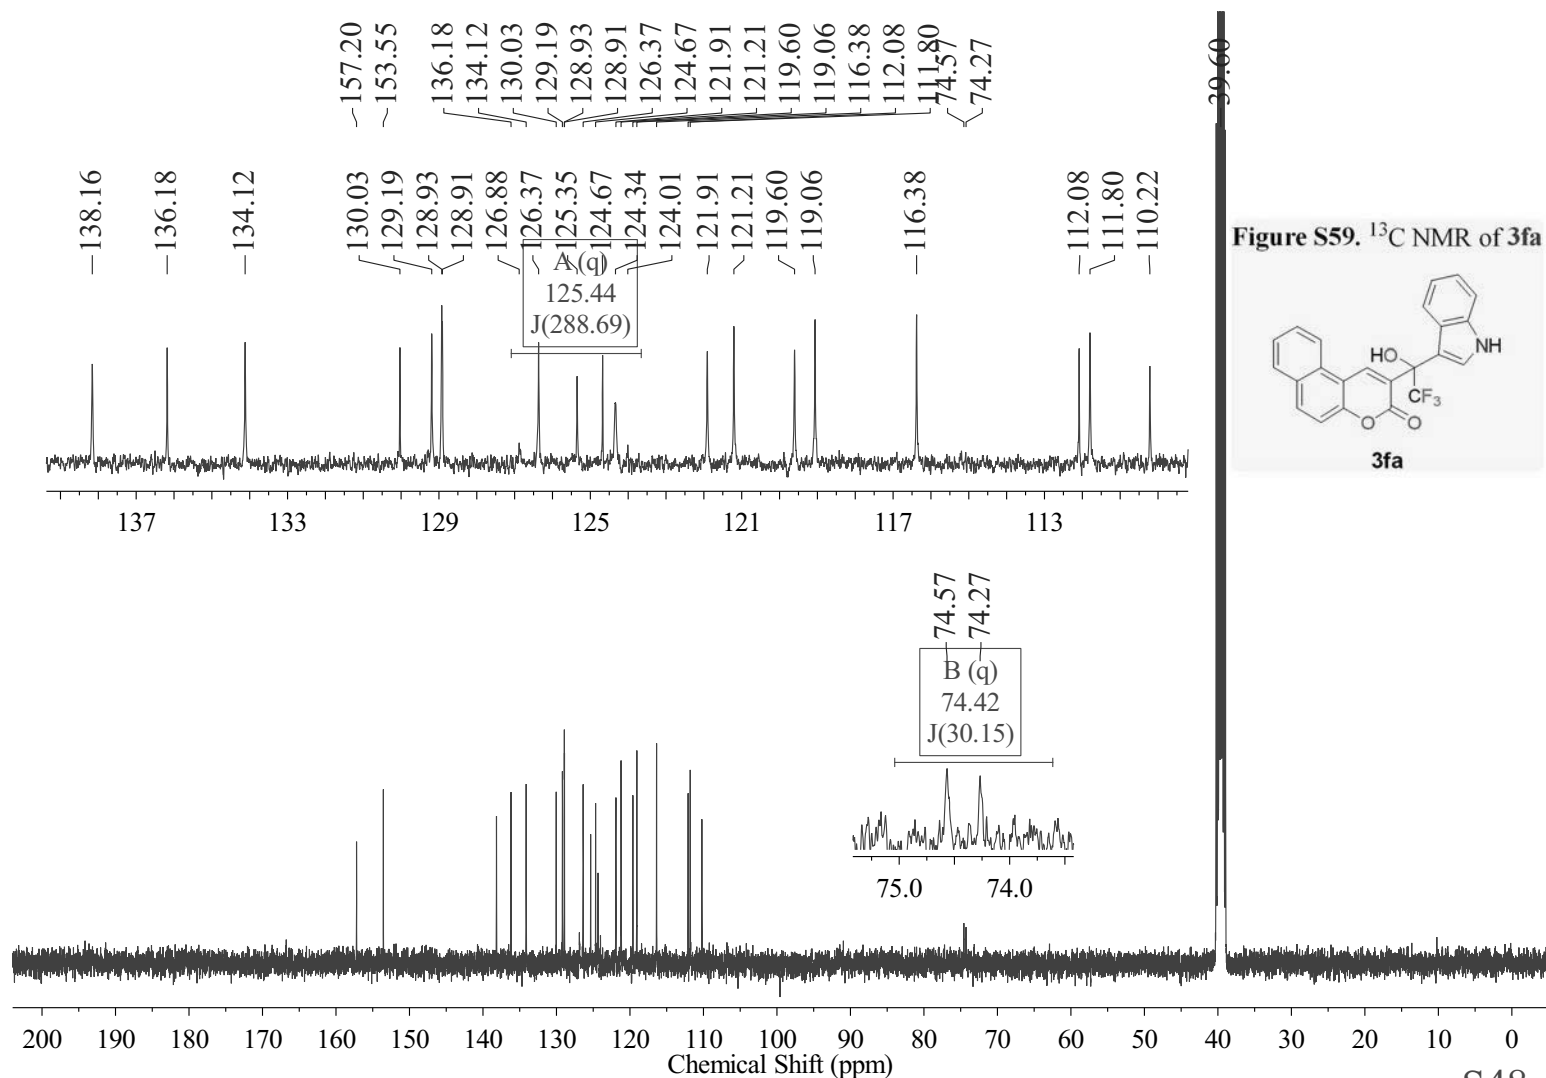

### 3. High Resolution Mass Spectra for compounds 3aa-3fa

#### Contents of HRMS Data

|                              |     |
|------------------------------|-----|
| Figure S60. HRMS of 3aa..... | S50 |
| Figure S61. HRMS of 3ab..... | S50 |
| Figure S62. HRMS of 3ac..... | S51 |
| Figure S63. HRMS of 3ad..... | S51 |
| Figure S64. HRMS of 3ae..... | S52 |
| Figure S65. HRMS of 3af..... | S52 |
| Figure S66. HRMS of 3ag..... | S53 |
| Figure S67. HRMS of 3ah..... | S53 |
| Figure S68. HRMS of 3ba..... | S54 |
| Figure S69. HRMS of 3bc..... | S54 |
| Figure S70. HRMS of 3bd..... | S55 |
| Figure S71. HRMS of 3ca..... | S55 |
| Figure S72. HRMS of 3cc..... | S56 |
| Figure S73. HRMS of 3cd..... | S56 |
| Figure S74. HRMS of 3da..... | S57 |
| Figure S75. HRMS of 3dc..... | S57 |
| Figure S76. HRMS of 3dd..... | S58 |
| Figure S77. HRMS of 3de..... | S58 |
| Figure S78. HRMS of 3df..... | S59 |
| Figure S79. HRMS of 3ea..... | S59 |
| Figure S80. HRMS of 3eb..... | S60 |
| Figure S81. HRMS of 3ec..... | S60 |
| Figure S82. HRMS of 3ed..... | S61 |
| Figure S83. HRMS of 3ee..... | S61 |
| Figure S84. HRMS of 3ef..... | S62 |
| Figure S85. HRMS of 3eh..... | S62 |
| Figure S86. HRMS of 3fa..... | S63 |

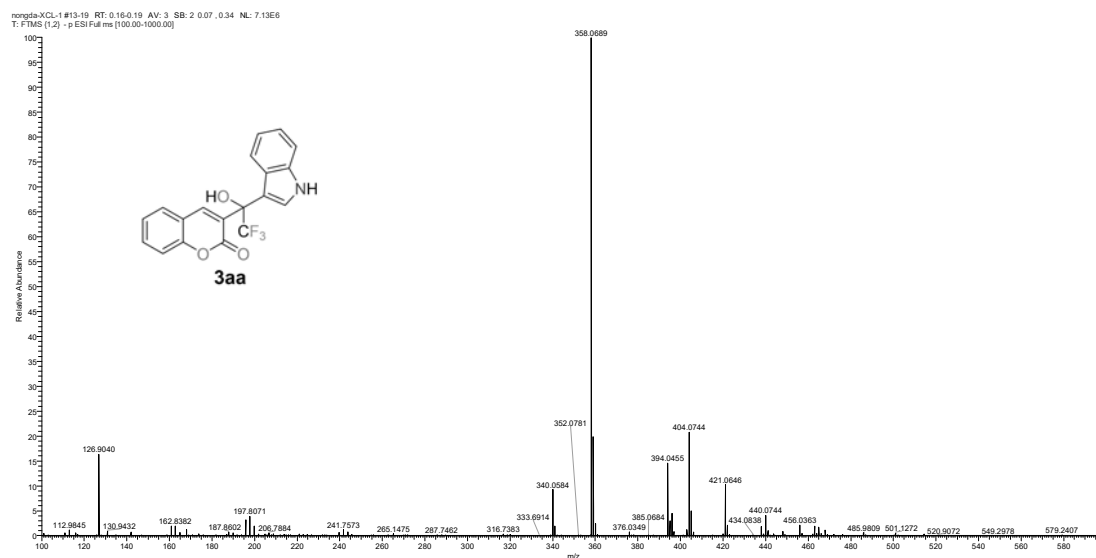

HRMS:  $m/z$  calcd for  $C_{19}H_{11}F_3NO_3$ : 358.0691  $[M-H]^+$ ; found: 358.0689.

**Figure S60. HRMS of 3aa**

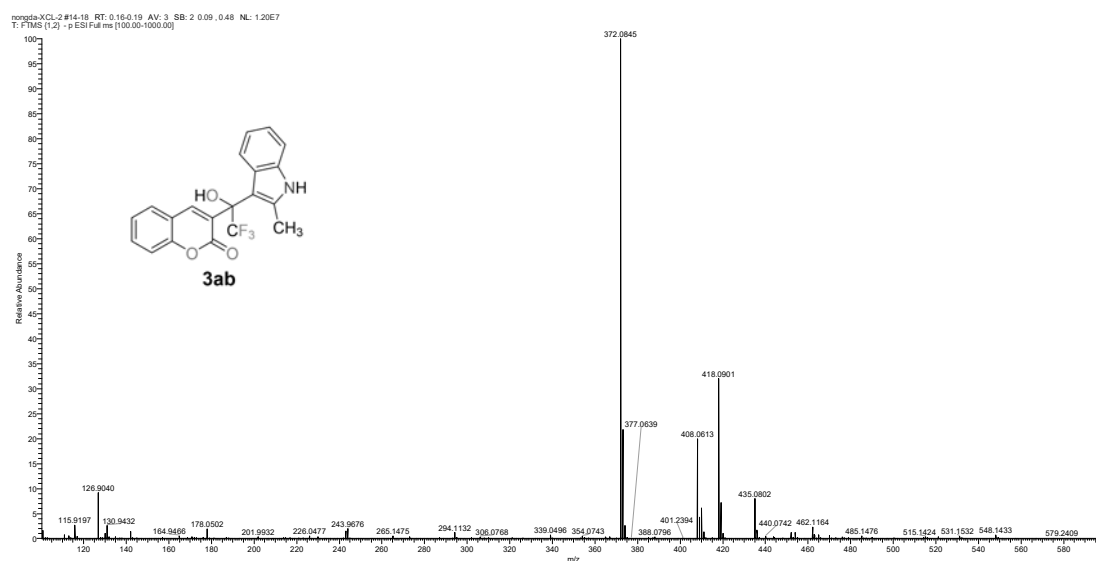

HRMS:  $m/z$  calcd for  $C_{20}H_{13}F_3NO_3$ : 372.0848  $[M-H]^+$ ; found: 372.0845.

**Figure S61. HRMS of 3ab**

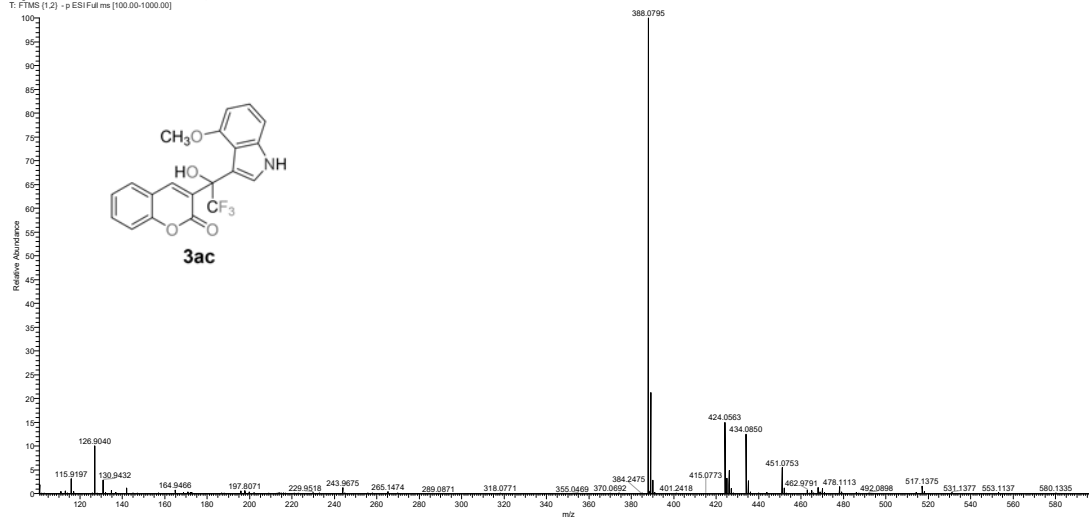

HRMS  $m/z$  calcd for  $C_{20}H_{13}F_3NO_4$ : 388.0797  $[M-H]^+$ ; found: 388.0795.

Figure S62. HRMS of 3ac

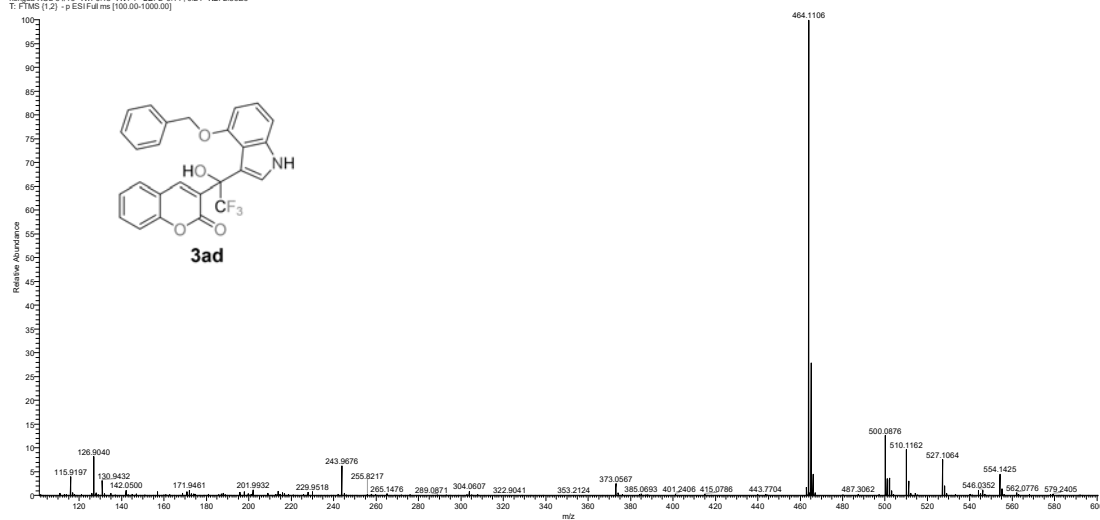

HRMS  $m/z$  calcd for  $C_{26}H_{17}F_3NO_4$ : 464.1110  $[M-H]^+$ ; found: 464.1106.

Figure S63. HRMS of 3ad

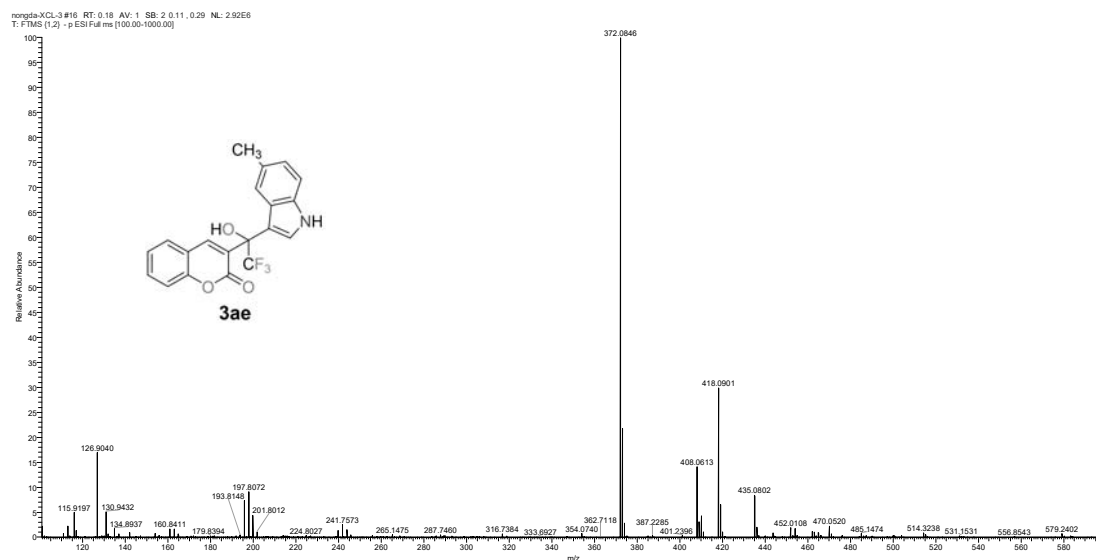

HRMS:  $m/z$  calcd for  $C_{20}H_{13}F_3NO_3$ : 372.0848  $[M-H]^+$ ; found: 372.0846.

**Figure S64. HRMS of 3ae**

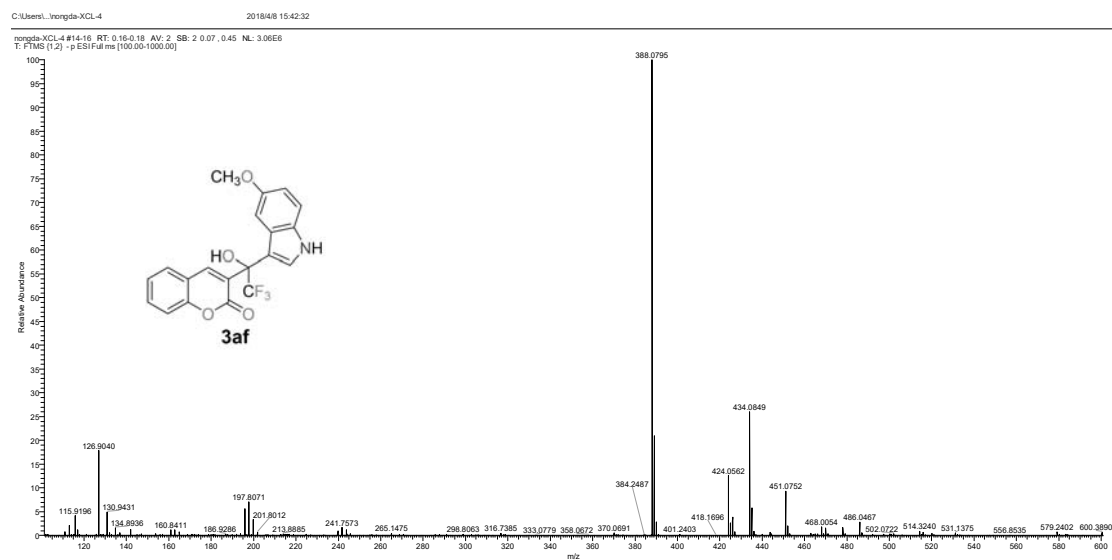

HRMS  $m/z$  calcd for  $C_{20}H_{13}F_3NO_4$ : 388.0797  $[M-H]^+$ ; found: 388.0795.

**Figure S65. HRMS of 3af**



|               |           |             |        |                 |              |                        |                      |
|---------------|-----------|-------------|--------|-----------------|--------------|------------------------|----------------------|
| Sample Name   | Yxx-3ag   | Position    | P1-A3  | Instrument Name | Instrument 1 | User Name              |                      |
| Inj Vol       | 0.5       | InjPosition |        | SampleType      | Sample       | IRM Calibration Status | Success              |
| Data Filename | Yxx-3ag.d | ACQ Method  | test.m | Comment         |              | Acquired Time          | 9/20/2019 9:09:58 PM |

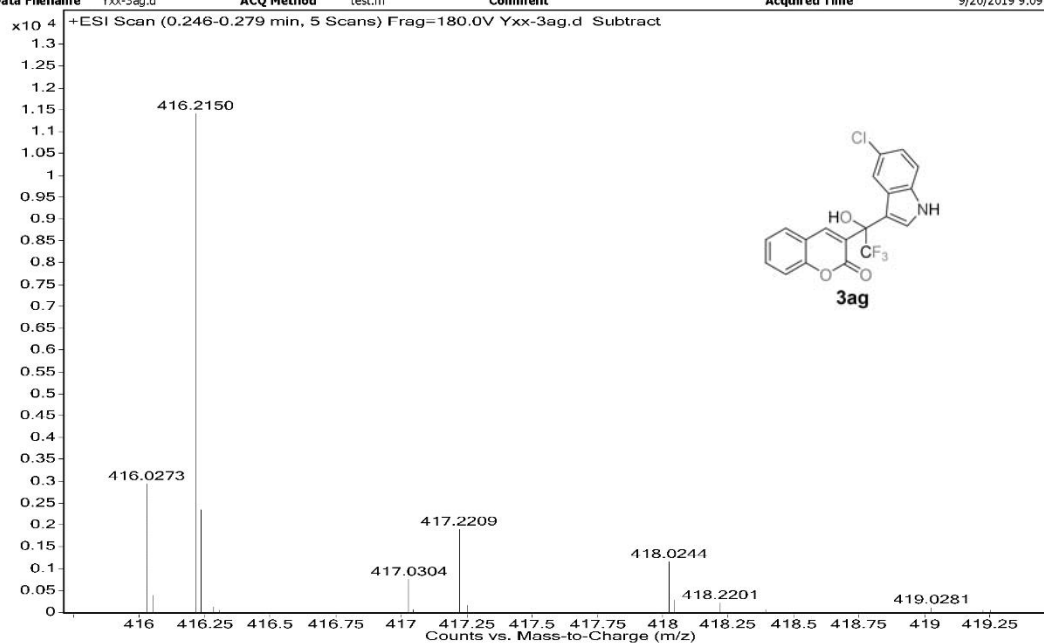

HRMS  $m/z$  calcd for  $C_{19}H_{11}ClF_3NNaO_3$ : 416.0277  $[M+Na]^+$ ; found:416.0273.

Figure S66. HRMS of 3ag

|               |           |             |        |                 |              |                        |                      |
|---------------|-----------|-------------|--------|-----------------|--------------|------------------------|----------------------|
| Sample Name   | Yxx-3ah   | Position    | P1-A2  | Instrument Name | Instrument 1 | User Name              |                      |
| Inj Vol       | 0.3       | InjPosition |        | SampleType      | Sample       | IRM Calibration Status | Success              |
| Data Filename | Yxx-3ah.d | ACQ Method  | test.m | Comment         |              | Acquired Time          | 9/20/2019 9:07:56 PM |

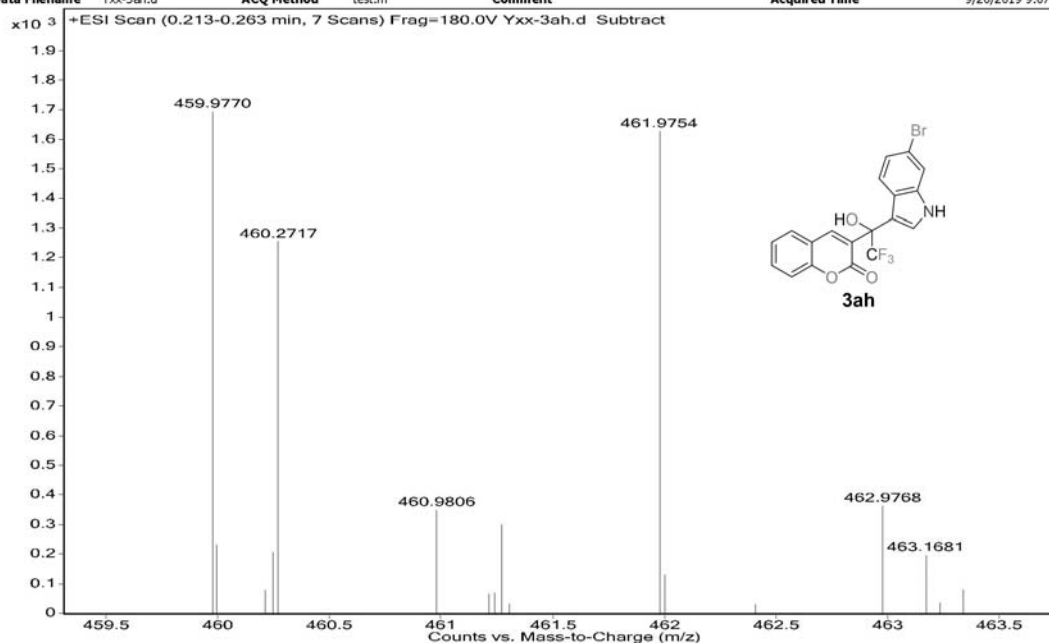

HRMS  $m/z$  calcd for  $C_{19}H_{11}BrF_3NNaO_3$ : 459.9772  $[M+Na]^+$ ; found:459.9770.

Figure S67. HRMS of 3ah

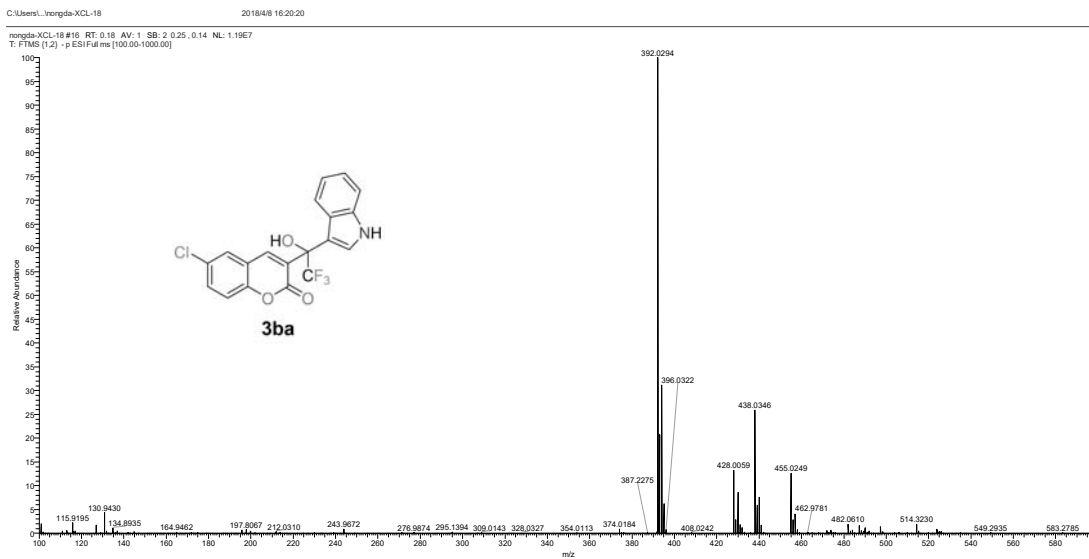

HRMS  $m/z$  calcd for  $C_{19}H_{10}ClF_3NO_3$ : 392.0301  $[M-H]^+$ ; found: 392.0294.

**Figure S68. HRMS of 3ba**

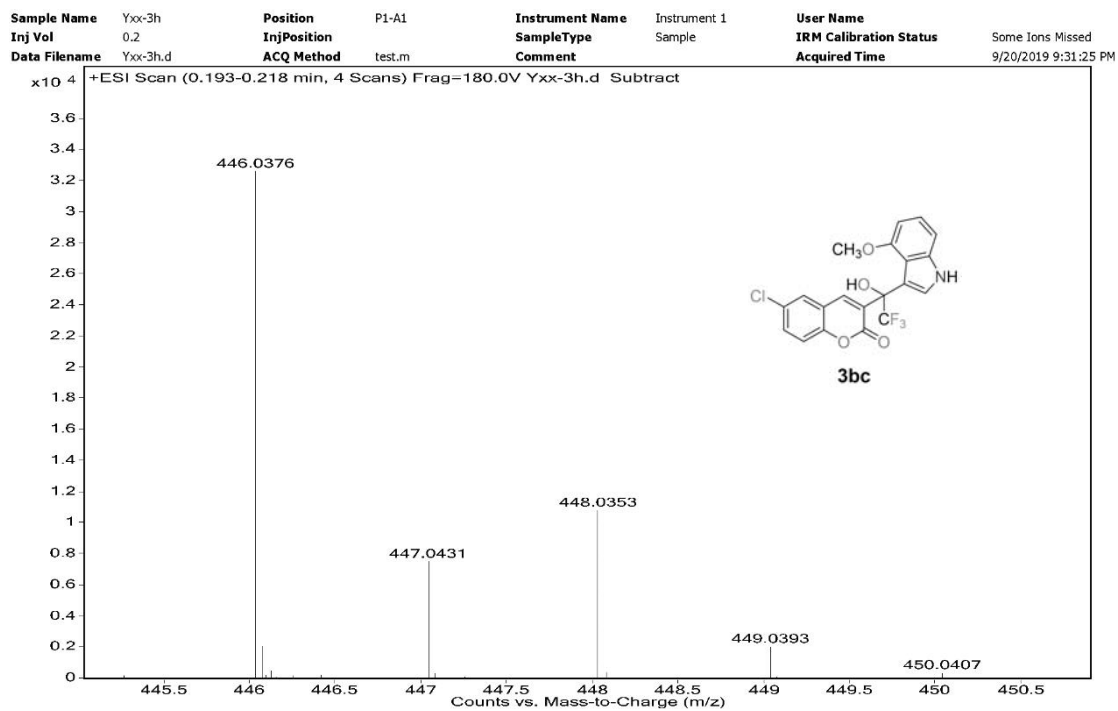

HRMS  $m/z$  calcd for  $C_{20}H_{13}ClF_3NNaO_4$ : 446.0383  $[M+Na]^+$ ; found: 446.0376.

**Figure S69. HRMS of 3bc**

nongda-XCL-19#16 RT: 0.18 AV: 1 NL: 3.86E6  
T: FTMS (1,2) - p ESI Full ms [100.00-1000.00]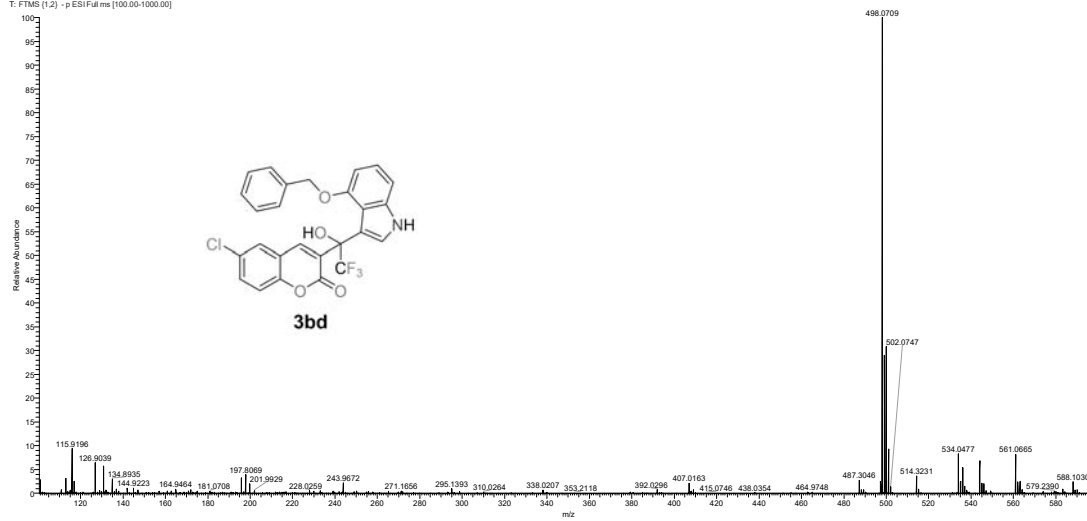

HRMS  $m/z$  calcd for  $C_{26}H_{16}ClF_3NO_4$ : 498.0720  $[M-H]^+$ ; found: 498.0709.

**Figure S70. HRMS of 3bd**

nongda-XCL-20 #13-21 RT: 0.16-0.21 AV: 4 SB: 2 0.14, 0.25 NL: 6.50E6  
T: FTMS {1,2} - p ESI Full ms [100.00-1000.00]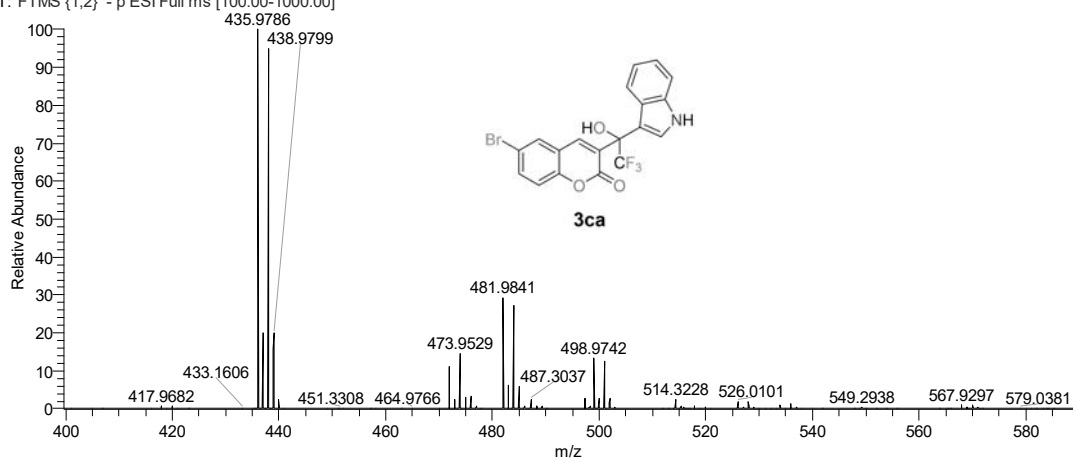

HRMS  $m/z$  calcd for  $C_{19}H_{10}BrF_3NO_3$ : 435.9796  $[M-H]^+$ ; found: 435.9786

**Figure S71. HRMS of 3ca**

nongda-XCL-21#16 RT: 0.18 AV: 1 SB: 2.014, 0.30 NL: 3.67E6  
T: FTMS (1,2) - p ESI Full ms [100.00-1000.00]

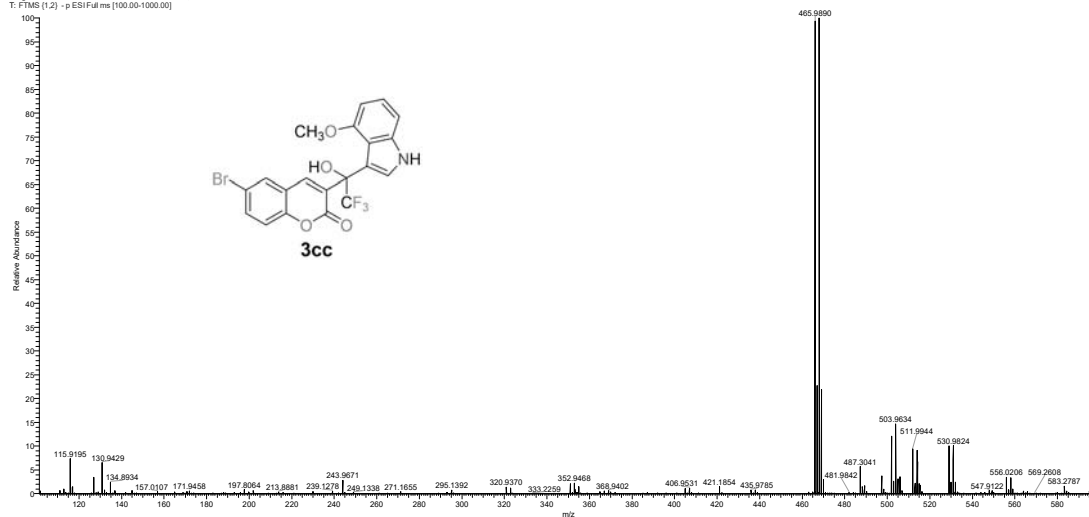

HRMS  $m/z$  calcd for  $C_{20}H_{12}BrF_3NO_4$ : 465.9902  $[M-H]^+$ ; found: 465.9890.

**Figure S72. HRMS of 3cc**

nongda-XCL-22 #14-22 RT: 0.16-0.24 AV: 5 SB: 2.014, 0.28 NL: 8.77E5  
T: FTMS (1,2) - p ESI Full ms [100.00-1000.00]

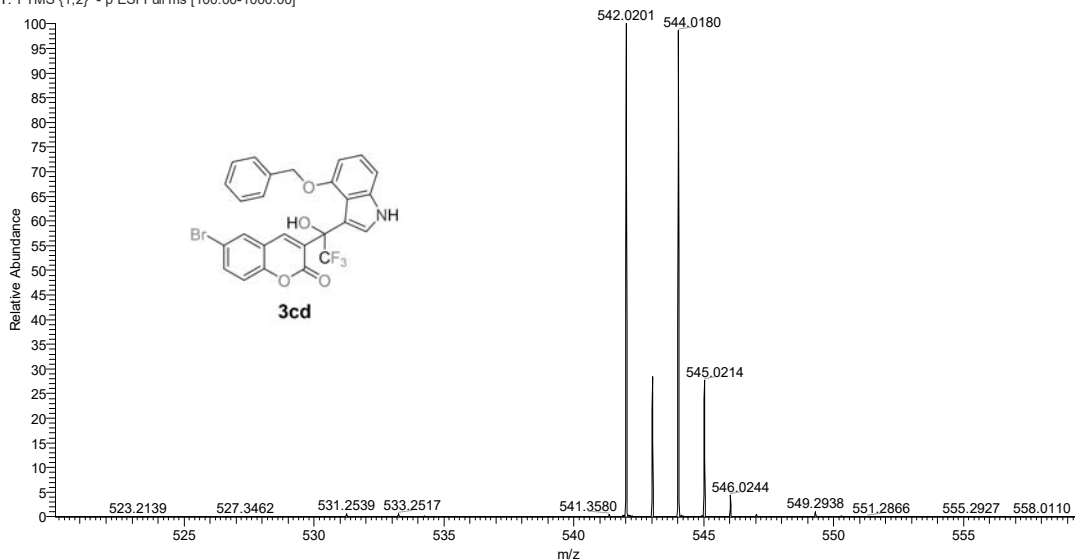

HRMS  $m/z$  calcd for  $C_{26}H_{16}BrF_3NO_4$ : 542.0215  $[M-H]^+$ ; found: 542.0201.

**Figure S73. HRMS of 3cd**

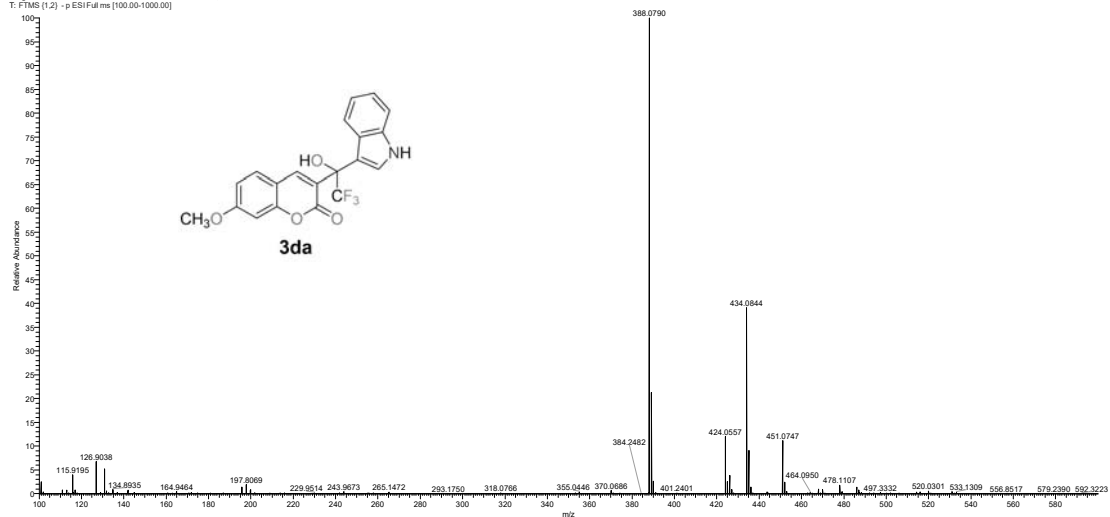

Figure S74. HRMS of 3da

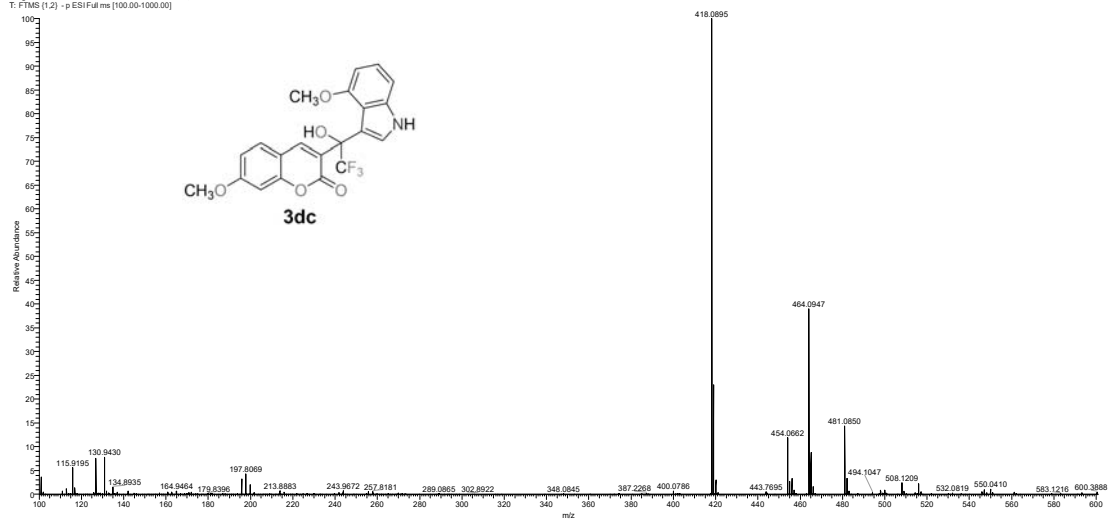

Figure S75. HRMS of 3dc

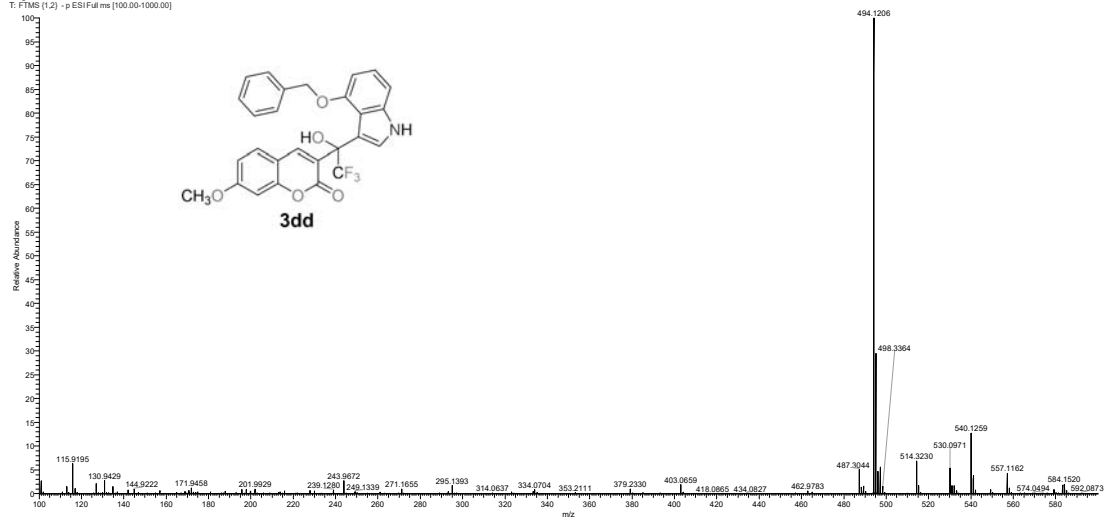

Figure S76. HRMS of 3dd

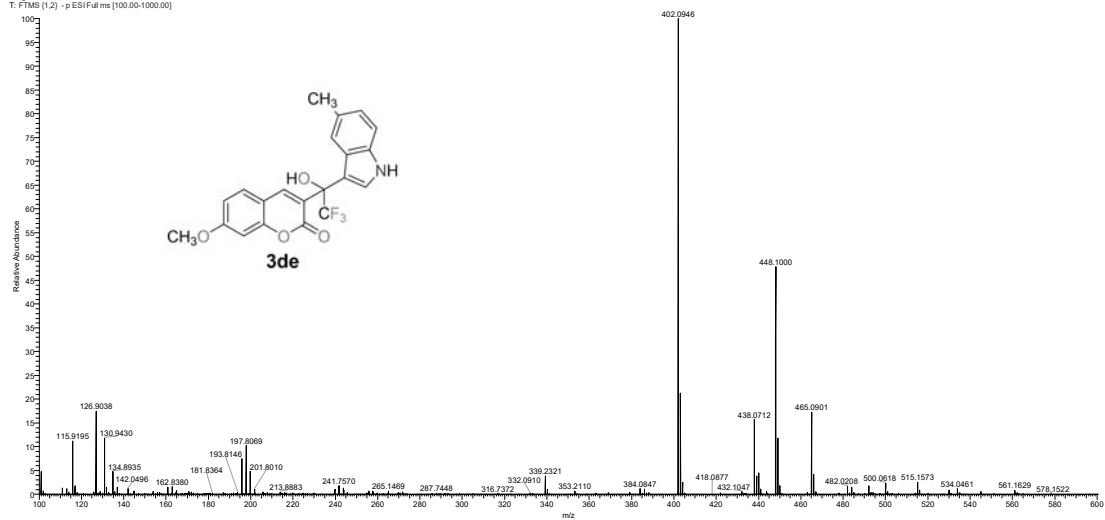

Figure S77. HRMS of 3de

nongda.XCL-16#16 RT: 0.18 AV: 1 NL: 4.77E9  
T: FTMS (1.2) -p ESI Full ms (100.00-1000.00)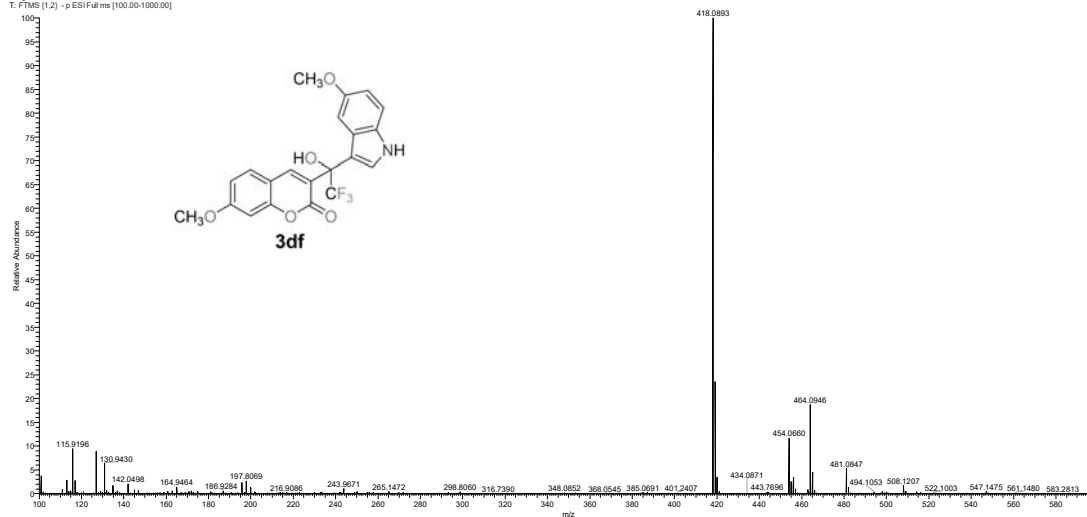**Figure S78. HRMS of 3df**nongda.XCL-7 #16 RT: 0.17 AV: 1 SB: 2.014, 0.31 NL: 1.14E7  
T: FTMS (1.2) -p ESI Full ms (100.00-1000.00)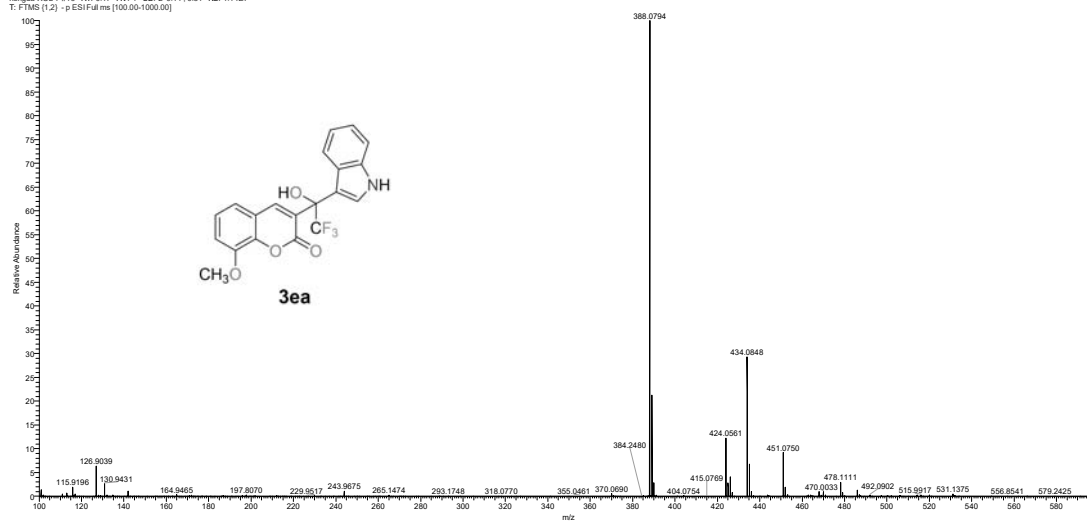**Figure S79. HRMS of 3ea**

nrongda-XCL-8#16 RT: 0.16 AV: 1 SB: 2 0.14, 0.24 NL: 3.08E8  
T: FTMS (1.2) -p ESI Full ms (100.00-1000.00)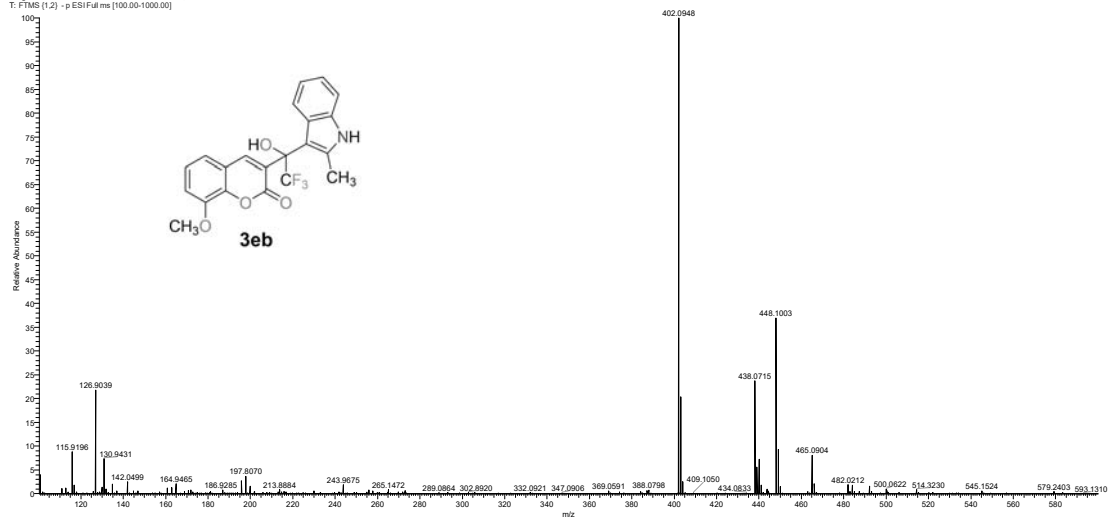**Figure S80. HRMS of 3eb**nrongda-XCL-11#15 RT: 0.17 AV: 1 SB: 2 0.14, 0.25 NL: 6.57E6  
T: FTMS (1.2) -p ESI Full ms (100.00-1000.00)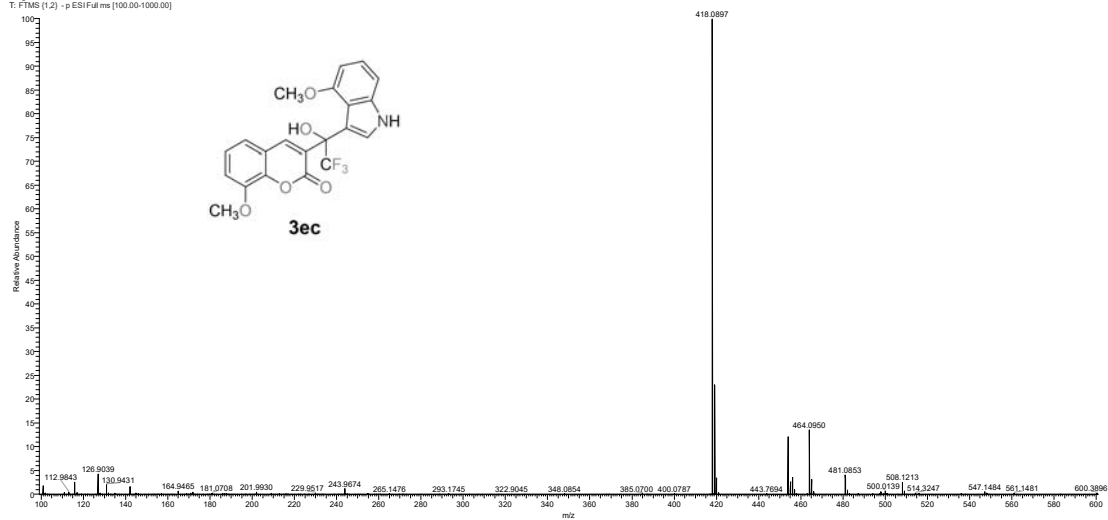**Figure S81. HRMS of 3ec**



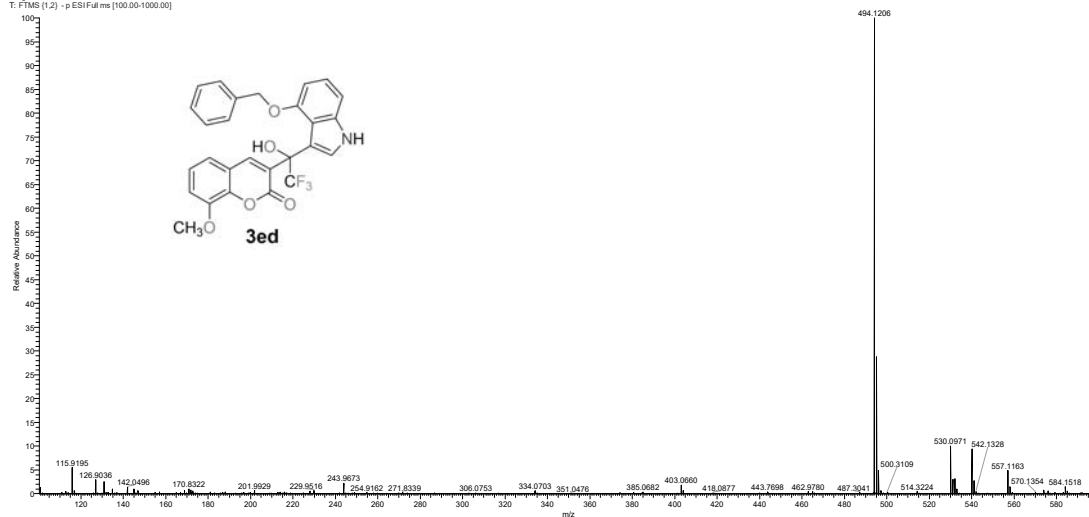

Figure S82. HRMS of 3ed

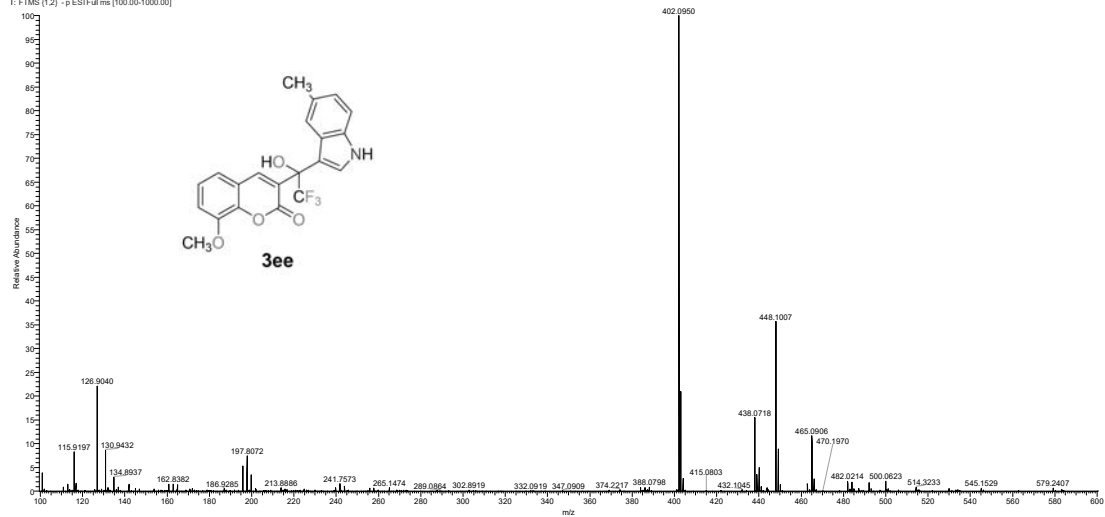

Figure S83. HRMS of 3ee

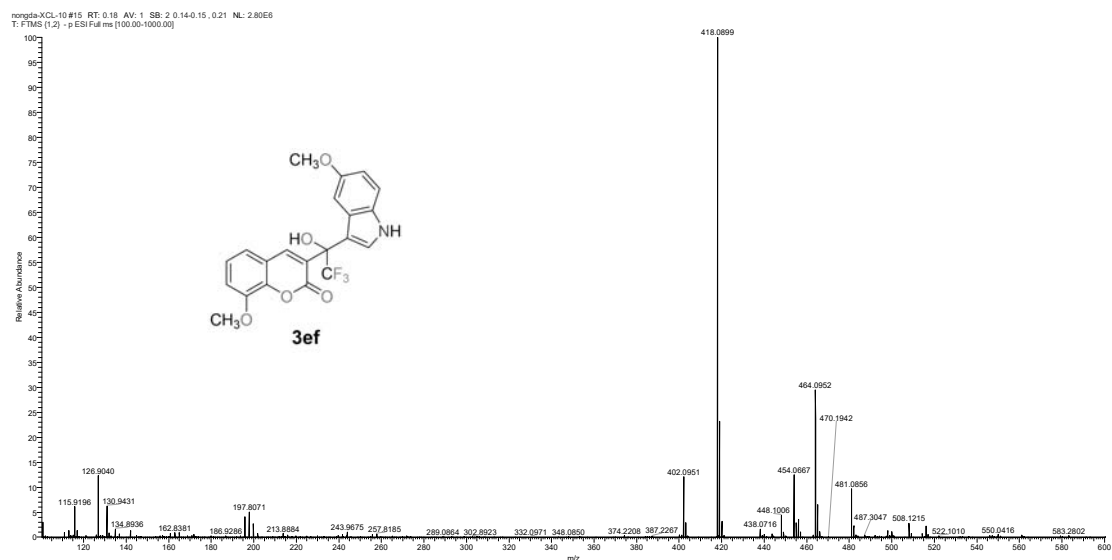

HRMS:  $m/z$  calcd for  $C_{21}H_{15}F_3NO_5$ : 418.0902  $[M-H]^+$ ; found: 418.0899.

**Figure S84. HRMS of 3ef**

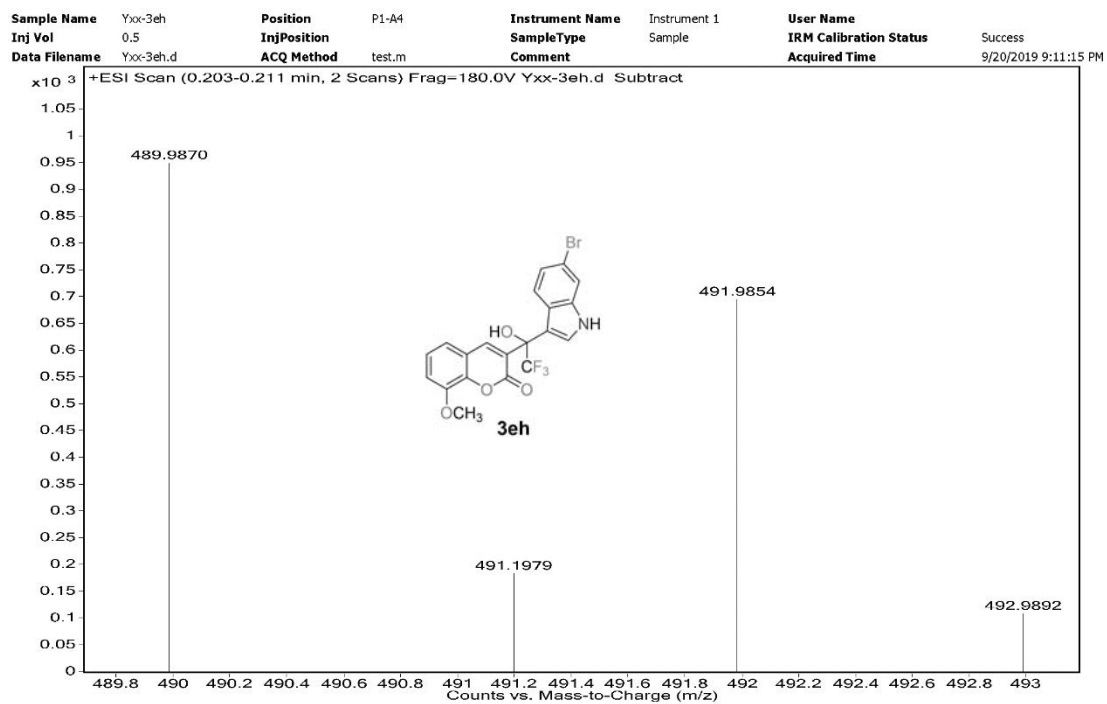

HRMS:  $m/z$  calcd for  $C_{20}H_{13}BrF_3NNaO_4$ : 489.9878  $[M+Na]^+$ ; found: 489.9870.

**Figure S85. HRMS of 3eh**

nrongda.XCL-23#16 RT: 0.18 AV: 1 NL: 5.41E9  
T: FTMS (1.2) -p ESIFull.ms [100.00-1000.00]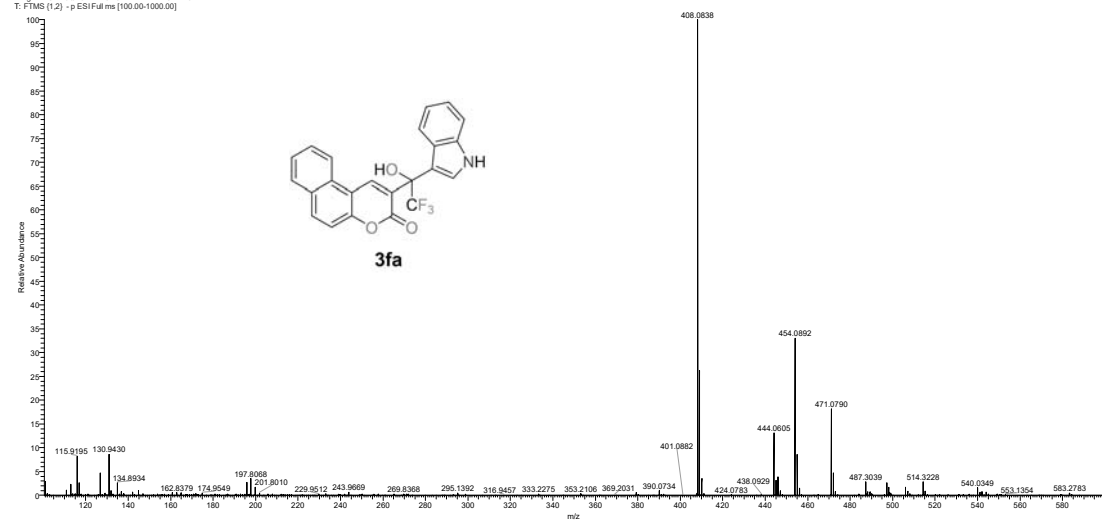

HRMS:  $m/z$  calcd for  $C_{23}H_{13}F_3NO_3$ : 408.0848  $[M-H]^+$ ; found: 408.0838.

**Figure S86. HRMS of 3fa**

#### 4. Crystal data for **3aa** and **3dd**

##### Contents of Crystal data

|                                                                                                                                                                |    |
|----------------------------------------------------------------------------------------------------------------------------------------------------------------|----|
| Table S2. Crystal data and structure refinement for <b>3aa</b> and <b>3dd</b> .....                                                                            | 65 |
| Table S3. Fractional Atomic Coordinates ( $\times 10^4$ ) and Equivalent Isotropic Displacement Parameters ( $\text{\AA}^2 \times 10^3$ ) for <b>3aa</b> ..... | 67 |
| Table S4. Anisotropic Displacement Parameters ( $\text{\AA}^2 \times 10^3$ ) for <b>3aa</b> .....                                                              | 68 |
| Table S5. Bond Lengths for <b>3aa</b> .....                                                                                                                    | 69 |
| Table S6. Bond Angles for <b>3aa</b> .....                                                                                                                     | 70 |
| Table S7. Hydrogen Bonds for <b>3aa</b> .....                                                                                                                  | 70 |
| Table S8. Hydrogen Atom Coordinates ( $\text{\AA} \times 10^4$ ) and Isotropic Displacement Parameters ( $\text{\AA}^2 \times 10^3$ ) for <b>3aa</b> .....     | 71 |
| Table S9. Fractional Atomic Coordinates ( $\times 10^4$ ) and Equivalent Isotropic Displacement Parameters ( $\text{\AA}^2 \times 10^3$ ) for <b>3dd</b> ..... | 72 |
| Table S10. Anisotropic Displacement Parameters ( $\text{\AA}^2 \times 10^3$ ) for <b>3dd</b> .....                                                             | 73 |
| Table S11. Bond Lengths for <b>3dd</b> .....                                                                                                                   | 74 |
| Table S12. Bond Angles for <b>3dd</b> .....                                                                                                                    | 75 |
| Table S13. Hydrogen Bonds for <b>3dd</b> .....                                                                                                                 | 75 |
| Table S14. Hydrogen Atom Coordinates ( $\text{\AA} \times 10^4$ ) and Isotropic Displacement Parameters ( $\text{\AA}^2 \times 10^3$ ) for <b>3dd</b> .....    | 76 |
| Table S15. Solvent masks information for <b>3dd</b> .....                                                                                                      | 76 |

**Table S2.** Crystal data and structure refinement for **3aa** and **3dd**

|                                          | <b>3aa</b>                                                     | <b>3dd</b>                                                     |
|------------------------------------------|----------------------------------------------------------------|----------------------------------------------------------------|
| Empirical formula                        | C <sub>19</sub> H <sub>12</sub> F <sub>3</sub> NO <sub>3</sub> | C <sub>27</sub> H <sub>20</sub> F <sub>3</sub> NO <sub>5</sub> |
| Formula weight                           | 359.30                                                         | 495.44                                                         |
| Temperature/K                            | 293(2)                                                         | 293(2)                                                         |
| Crystal system                           | monoclinic                                                     | Monoclinic                                                     |
| Space group                              | P2 <sub>1</sub> /c                                             | C2/c                                                           |
| a/Å                                      | 5.8958(2)                                                      | 22.1710(10)                                                    |
| b/Å                                      | 15.5043(9)                                                     | 8.6836(3)                                                      |
| c/Å                                      | 17.1980(6)                                                     | 32.4701(14)                                                    |
| α/°                                      | 90                                                             | 90                                                             |
| β/°                                      | 99.277(4)                                                      | 111.054(5)                                                     |
| γ/°                                      | 90                                                             | 90                                                             |
| Volume/Å <sup>3</sup>                    | 1551.49(13)                                                    | 5833.9(5)                                                      |
| Z                                        | 4                                                              | 8                                                              |
| ρ <sub>calc</sub> /(g/cm <sup>-3</sup> ) | 1.538                                                          | 1.128                                                          |
| μ/mm <sup>-1</sup>                       | 1.107                                                          | 0.772                                                          |
| F(000)                                   | 736.0                                                          | 2048.0                                                         |
| Crystal size/mm <sup>3</sup>             | 0.2×0.18×0.15                                                  | 0.24×0.17×0.14                                                 |
| Radiation                                | CuKα (λ = 1.54184)                                             | CuKα (λ = 1.54184)                                             |
| 2θ range for data collection/°           | 7.724 to 134.112                                               | 8.442 to 134.128                                               |
| Index ranges                             | -4 ≤ h ≤ 7,<br>-18 ≤ k ≤ 18,<br>-20 ≤ l ≤ 20                   | -25 ≤ h ≤ 26,<br>-10 ≤ k ≤ 10,<br>-38 ≤ l ≤ 29                 |

|                                                |                                                                     |                                                                     |
|------------------------------------------------|---------------------------------------------------------------------|---------------------------------------------------------------------|
| Reflections collected                          | 5737                                                                | 13558                                                               |
| Independent reflections                        | 2762 [ $R_{\text{int}} = 0.0347$ ,<br>$R_{\text{sigma}} = 0.0533$ ] | 5220 [ $R_{\text{int}} = 0.0221$ ,<br>$R_{\text{sigma}} = 0.0222$ ] |
| Data/restraints/parameters                     | 2762/0/237                                                          | 5220/0/327                                                          |
| Goodness-of-fit on $F^2$                       | 1.002                                                               | 1.051                                                               |
| Final R indexes [ $I \geq 2\sigma(I)$ ]        | $R_1 = 0.0522$ ,<br>$wR_2 = 0.1273$                                 | $R_1 = 0.0731$ ,<br>$wR_2 = 0.2181$                                 |
| Final R indexes [all data]                     | $R_1 = 0.0725$ ,<br>$wR_2 = 0.1504$                                 | $R_1 = 0.0850$ ,<br>$wR_2 = 0.2350$                                 |
| Largest diff. peak/hole / $e \text{ \AA}^{-3}$ | 0.21/-0.20                                                          | 0.18/-0.34                                                          |

**Table S3. Fractional Atomic Coordinates ( $\times 10^4$ ) and Equivalent Isotropic Displacement Parameters ( $\text{\AA}^2 \times 10^3$ ) for 3aa.**

$U_{eq}$  is defined as 1/3 of the trace of the orthogonalised  $U_{ij}$  tensor.

| Atom | <i>x</i> | <i>y</i>   | <i>z</i>   | U(eq)   |
|------|----------|------------|------------|---------|
| C1   | 2663(4)  | 3077.3(17) | 4049.8(14) | 48.0(6) |
| C2   | 1822(5)  | 3981.0(19) | 4219.5(15) | 57.6(7) |
| C3   | -675(4)  | 2962.0(19) | 2870.6(14) | 55.1(7) |
| C4   | 1431(4)  | 2736.8(18) | 3272.8(13) | 47.6(6) |
| C5   | 2290(4)  | 2060.0(17) | 2834.2(13) | 47.8(6) |
| C6   | 621(4)   | 1916.9(18) | 2164.9(14) | 52.6(6) |
| C7   | 879(5)   | 1300(2)    | 1599.4(14) | 63.3(8) |
| C8   | 2851(5)  | 825(2)     | 1711.5(17) | 69.4(8) |
| C9   | 4564(5)  | 952(2)     | 2366.5(16) | 66.5(8) |
| C10  | 4304(4)  | 1563.0(19) | 2925.8(15) | 57.0(7) |
| C11  | 4128(4)  | 2438.5(19) | 5432.6(14) | 52.0(6) |
| C12  | 2350(4)  | 2465.3(17) | 4730.2(13) | 46.1(6) |
| C13  | 498(4)   | 1957.3(18) | 4698.9(14) | 51.0(6) |
| C14  | 200(4)   | 1383.3(18) | 5330.4(14) | 52.4(6) |
| C15  | 1900(5)  | 1365.1(18) | 5983.1(14) | 55.4(6) |
| C16  | 1777(6)  | 823(2)     | 6616.5(16) | 70.9(8) |
| C17  | -102(6)  | 298(2)     | 6593.0(18) | 78.1(9) |
| C18  | -1848(6) | 303(2)     | 5949(2)    | 76.9(9) |
| C19  | -1703(5) | 842(2)     | 5320.6(17) | 67.8(8) |
| F1   | 1961(3)  | 4528.0(12) | 3630.9(10) | 80.4(6) |
| F2   | -368(3)  | 3984.0(12) | 4340.8(10) | 73.7(5) |
| F3   | 3068(3)  | 4322.8(12) | 4863.4(10) | 76.4(5) |
| N1   | -1157(3) | 2473.5(17) | 2206.7(12) | 58.9(6) |
| O1   | 5026(3)  | 3165.6(15) | 3971.8(10) | 61.7(6) |
| O2   | 5890(3)  | 2851.6(14) | 5539.2(11) | 65.6(6) |
| O3   | 3812(3)  | 1883.1(13) | 6023.1(10) | 58.9(5) |

**Table S4. Anisotropic Displacement Parameters ( $\text{\AA}^2 \times 10^3$ ) for 3aa.**

The Anisotropic displacement factor exponent takes the form:

$$-2\pi^2[h^2a^2U_{11}+2hka*b*U_{12}+\dots].$$

| Atom | U <sub>11</sub> | U <sub>22</sub> | U <sub>33</sub> | U <sub>23</sub> | U <sub>13</sub> | U <sub>12</sub> |
|------|-----------------|-----------------|-----------------|-----------------|-----------------|-----------------|
| C1   | 35.8(11)        | 63.4(15)        | 43.3(12)        | 0.3(11)         | 2.2(9)          | -3.3(10)        |
| C2   | 62.5(16)        | 60.3(17)        | 48.6(13)        | 3.0(12)         | 4.7(11)         | -6.0(13)        |
| C3   | 45.2(13)        | 71.4(18)        | 46.8(13)        | 4.4(12)         | 1.4(10)         | -0.2(12)        |
| C4   | 41.3(11)        | 62.3(15)        | 38.0(11)        | 7.4(11)         | 2.4(9)          | -4.7(11)        |
| C5   | 45.0(12)        | 60.4(15)        | 36.6(11)        | 5.9(11)         | 2.4(9)          | -9.9(11)        |
| C6   | 50.0(13)        | 64.6(16)        | 40.6(12)        | 10.0(11)        | -0.4(10)        | -9.1(12)        |
| C7   | 73.3(18)        | 70.5(19)        | 42.2(13)        | 0.7(13)         | -2.6(12)        | -19.0(15)       |
| C8   | 88(2)           | 64.5(18)        | 54.9(15)        | -3.7(14)        | 10.1(14)        | -7.8(16)        |
| C9   | 69.2(18)        | 64.7(18)        | 65.3(17)        | 2.5(15)         | 9.9(13)         | 5.2(15)         |
| C10  | 53.5(14)        | 65.5(17)        | 48.3(13)        | 5.1(13)         | -2.4(10)        | -0.7(13)        |
| C11  | 49.2(13)        | 61.3(16)        | 41.6(12)        | -5.6(12)        | -3.9(10)        | 7.6(12)         |
| C12  | 38.8(11)        | 58.2(15)        | 39.1(11)        | -3.0(11)        | 0.2(9)          | 3.2(11)         |
| C13  | 43.6(12)        | 64.5(16)        | 42.2(12)        | 3.7(11)         | -1.2(9)         | 0.0(11)         |
| C14  | 53.3(14)        | 57.2(15)        | 47.9(13)        | 1.8(12)         | 11.8(10)        | 3.2(12)         |
| C15  | 63.7(15)        | 60.2(16)        | 42.9(12)        | 1.3(12)         | 10.5(11)        | 13.5(13)        |
| C16  | 88(2)           | 76(2)           | 48.9(15)        | 10.5(15)        | 10.5(13)        | 19.1(18)        |
| C17  | 104(2)          | 72(2)           | 63.7(18)        | 19.3(16)        | 30.2(17)        | 12(2)           |
| C18  | 87(2)           | 68(2)           | 82(2)           | 10.4(17)        | 32.6(18)        | -2.5(17)        |
| C19  | 62.7(17)        | 76(2)           | 65.2(17)        | 7.0(16)         | 11.7(13)        | -1.5(15)        |
| F1   | 105.7(14)       | 66.1(11)        | 68.5(10)        | 13.6(9)         | 11.1(10)        | -6.7(10)        |
| F2   | 64.9(10)        | 72.0(11)        | 85.5(12)        | -0.3(10)        | 16.2(8)         | 10.6(9)         |
| F3   | 89.1(12)        | 70.9(11)        | 63.7(10)        | -11.6(9)        | -3.8(8)         | -6.7(10)        |
| N1   | 45.7(11)        | 80.4(16)        | 44.8(11)        | 7.1(11)         | -10.4(8)        | -4.0(11)        |
| O1   | 39.4(9)         | 94.6(15)        | 50(1)           | -7.6(10)        | 4.0(7)          | -12.7(9)        |
| O2   | 50.2(10)        | 81.7(14)        | 57.4(11)        | -3.7(10)        | -14.7(8)        | -6.1(10)        |
| O3   | 58.9(10)        | 71.4(12)        | 41.4(9)         | 3.0(9)          | -6.7(7)         | 8.6(9)          |



**Table S5. Bond Lengths for 3aa.**

| <b>Atom</b> | <b>Atom</b> | <b>Length/Å</b> | <b>Atom</b> | <b>Atom</b> | <b>Length/Å</b> |
|-------------|-------------|-----------------|-------------|-------------|-----------------|
| C1          | C2          | 1.530(4)        | C8          | C9          | 1.400(4)        |
| C1          | C4          | 1.510(3)        | C9          | C10         | 1.376(4)        |
| C1          | C12         | 1.541(3)        | C11         | C12         | 1.467(3)        |
| C1          | O1          | 1.428(3)        | C11         | O2          | 1.209(3)        |
| C2          | F1          | 1.333(3)        | C11         | O3          | 1.367(3)        |
| C2          | F2          | 1.340(3)        | C12         | C13         | 1.341(3)        |
| C2          | F3          | 1.336(3)        | C13         | C14         | 1.437(3)        |
| C3          | C4          | 1.366(3)        | C14         | C15         | 1.379(3)        |
| C3          | N1          | 1.361(3)        | C14         | C19         | 1.399(4)        |
| C4          | C5          | 1.432(4)        | C15         | C16         | 1.387(4)        |
| C5          | C6          | 1.406(3)        | C15         | O3          | 1.377(3)        |
| C5          | C10         | 1.403(4)        | C16         | C17         | 1.370(5)        |
| C6          | C7          | 1.390(4)        | C17         | C18         | 1.385(5)        |
| C6          | N1          | 1.369(4)        | C18         | C19         | 1.380(4)        |
| C7          | C8          | 1.363(4)        |             |             |                 |

**Table S6. Bond Angles for 3aa.**

| Atom | Atom | Atom | Angle/°    | Atom | Atom | Atom | Angle/°    |
|------|------|------|------------|------|------|------|------------|
| C2   | C1   | C12  | 109.7(2)   | C7   | C8   | C9   | 121.8(3)   |
| C4   | C1   | C2   | 111.4(2)   | C10  | C9   | C8   | 120.8(3)   |
| C4   | C1   | C12  | 111.0(2)   | C9   | C10  | C5   | 119.2(2)   |
| O1   | C1   | C2   | 106.3(2)   | O2   | C11  | C12  | 126.3(3)   |
| O1   | C1   | C4   | 106.73(19) | O2   | C11  | O3   | 115.9(2)   |
| O1   | C1   | C12  | 111.62(19) | O3   | C11  | C12  | 117.7(2)   |
| F1   | C2   | C1   | 112.1(2)   | C11  | C12  | C1   | 119.1(2)   |
| F1   | C2   | F2   | 107.1(2)   | C13  | C12  | C1   | 121.9(2)   |
| F1   | C2   | F3   | 106.5(2)   | C13  | C12  | C11  | 119.1(2)   |
| F2   | C2   | C1   | 112.5(2)   | C12  | C13  | C14  | 122.1(2)   |
| F3   | C2   | C1   | 111.7(2)   | C15  | C14  | C13  | 117.8(2)   |
| F3   | C2   | F2   | 106.5(2)   | C15  | C14  | C19  | 118.3(3)   |
| N1   | C3   | C4   | 109.4(2)   | C19  | C14  | C13  | 123.9(2)   |
| C3   | C4   | C1   | 128.8(2)   | C14  | C15  | C16  | 121.9(3)   |
| C3   | C4   | C5   | 106.9(2)   | O3   | C15  | C14  | 120.7(2)   |
| C5   | C4   | C1   | 124.2(2)   | O3   | C15  | C16  | 117.4(3)   |
| C6   | C5   | C4   | 106.7(2)   | C17  | C16  | C15  | 118.7(3)   |
| C10  | C5   | C4   | 135.1(2)   | C16  | C17  | C18  | 120.9(3)   |
| C10  | C5   | C6   | 118.2(2)   | C19  | C18  | C17  | 119.8(3)   |
| C7   | C6   | C5   | 122.7(3)   | C18  | C19  | C14  | 120.3(3)   |
| N1   | C6   | C5   | 107.4(2)   | C3   | N1   | C6   | 109.7(2)   |
| N1   | C6   | C7   | 129.9(2)   | C11  | O3   | C15  | 122.59(19) |
| C8   | C7   | C6   | 117.4(2)   |      |      |      |            |

**Table S7. Hydrogen Bonds for 3aa.**

| D  | H   | A               | d(D-H)/Å | d(H-A)/Å | d(D-A)/Å | D-H-A/° |
|----|-----|-----------------|----------|----------|----------|---------|
| N1 | H1  | O2 <sup>1</sup> | 0.86     | 2.41     | 3.146(3) | 144.3   |
| N1 | H1  | O3 <sup>1</sup> | 0.86     | 2.64     | 3.462(3) | 161.5   |
| O1 | H1A | O2              | 0.82     | 2.02     | 2.705(3) | 141.3   |

<sup>1</sup>-1+X,1/2-Y,-1/2+Z

**Table S8. Hydrogen Atom Coordinates ( $\text{\AA}\times 10^4$ ) and Isotropic Displacement Parameters ( $\text{\AA}^2\times 10^3$ ) for 3aa.**

| <b>Atom</b> | <b><i>x</i></b> | <b><i>y</i></b> | <b><i>z</i></b> | <b>U(eq)</b> |
|-------------|-----------------|-----------------|-----------------|--------------|
| H3          | -1632           | 3383            | 3026            | 66           |
| H7          | -249            | 1214            | 1162            | 76           |
| H8          | 3064            | 406             | 1343            | 83           |
| H9          | 5893            | 619             | 2424            | 80           |
| H10         | 5449            | 1645            | 3359            | 68           |
| H13         | -631            | 1977            | 4254            | 61           |
| H16         | 2949            | 816             | 7049            | 85           |
| H17         | -207            | -66             | 7015            | 94           |
| H18         | -3115           | -57             | 5941            | 92           |
| H19         | -2876           | 845             | 4888            | 81           |
| H1          | -2392           | 2509            | 1865            | 71           |
| H1A         | 5805            | 3217            | 4410            | 93           |

**Table S9. Fractional Atomic Coordinates ( $\times 10^4$ ) and Equivalent Isotropic Displacement Parameters ( $\text{\AA}^2 \times 10^3$ ) for 3dd.**

$U_{\text{eq}}$  is defined as 1/3 of the trace of the orthogonalised  $U_{ij}$  tensor.

| Atom | x          | y        | z          | U(eq)     |
|------|------------|----------|------------|-----------|
| C1   | 3002.7(13) | 1578(3)  | 3492.8(8)  | 75.5(6)   |
| C2   | 3979.7(14) | 911(4)   | 4194.0(8)  | 81.7(7)   |
| C3   | 3662.2(12) | 1993(3)  | 3844.9(7)  | 71.4(6)   |
| C4   | 3944.5(12) | 3357(3)  | 3838.4(8)  | 74.2(6)   |
| C5   | 4543.2(13) | 3780(3)  | 4167.6(8)  | 78.0(6)   |
| C6   | 4840.8(13) | 2736(3)  | 4501.2(8)  | 77.5(6)   |
| C7   | 5417.3(13) | 3029(4)  | 4841.1(9)  | 84.3(7)   |
| C8   | 5711.9(14) | 4423(4)  | 4843.8(10) | 91.1(8)   |
| C9   | 5428.3(17) | 5505(4)  | 4513.4(11) | 102.7(10) |
| C10  | 4853.7(16) | 5186(4)  | 4180.6(10) | 95.4(9)   |
| C11  | 2471.5(15) | 2255(4)  | 3638.6(9)  | 90.5(8)   |
| C12  | 2497.1(12) | 3131(3)  | 2768.6(8)  | 76.1(6)   |
| C13  | 2943.1(11) | 2152(3)  | 3039.2(7)  | 68.2(6)   |
| C14  | 3340.6(11) | 1646(3)  | 2797.6(8)  | 67.5(5)   |
| C15  | 3099.2(12) | 2369(3)  | 2384.7(8)  | 73.9(6)   |
| C16  | 3358.3(16) | 2168(4)  | 2057.5(10) | 89.7(8)   |
| C17  | 3878.7(16) | 1213(4)  | 2155.9(10) | 94.9(9)   |
| C18  | 4147.4(15) | 470(4)   | 2570.1(11) | 91.5(8)   |
| C19  | 3882.9(12) | 695(3)   | 2888.3(8)  | 75.1(6)   |
| C20  | 4735.5(14) | -694(4)  | 3437.7(10) | 88.9(8)   |
| C21  | 4712.4(13) | -2288(3) | 3252.4(9)  | 80.8(7)   |
| C22  | 4144.6(16) | -3084(4) | 3071.4(11) | 95.4(9)   |
| C23  | 4132(2)    | -4556(5) | 2918.6(13) | 113.4(11) |
| C24  | 4696(3)    | -5252(5) | 2947.8(15) | 130.1(14) |
| C25  | 5273(2)    | -4462(5) | 3122.7(15) | 124.5(13) |
| C26  | 5280.0(16) | -2976(4) | 3275.2(12) | 98.2(9)   |
| C27  | 6613.8(18) | 3787(5)  | 5483.4(12) | 120.0(13) |
| F1   | 1885.7(8)  | 1875(3)  | 3373.6(7)  | 112.1(7)  |
| F2   | 2495.1(9)  | 3802(2)  | 3659.5(6)  | 103.7(6)  |
| F3   | 2536.2(10) | 1770(3)  | 4041.8(6)  | 116.9(7)  |
| N1   | 2586.5(11) | 3266(3)  | 2378.8(7)  | 79.3(6)   |
| O1   | 2883.9(10) | -33(2)   | 3461.3(6)  | 83.3(5)   |
| O2   | 3793.6(12) | -368(3)  | 4235.5(7)  | 107.3(7)  |
| O3   | 4554.5(9)  | 1330(2)  | 4506.8(6)  | 87.0(5)   |
| O4   | 6280.0(11) | 4870(3)  | 5151.7(8)  | 109.9(7)  |
| O5   | 4117.8(9)  | 56(2)    | 3299.4(6)  | 86.2(5)   |

**Table S10. Anisotropic Displacement Parameters ( $\text{\AA}^2 \times 10^3$ ) for 3dd.**

The Anisotropic displacement factor exponent takes the form:

$$-2\pi^2[h^2a^2U_{11}+2hka*b*U_{12}+\dots].$$

| Atom | U <sub>11</sub> | U <sub>22</sub> | U <sub>33</sub> | U <sub>23</sub> | U <sub>13</sub> | U <sub>12</sub> |
|------|-----------------|-----------------|-----------------|-----------------|-----------------|-----------------|
| C1   | 72.5(14)        | 82.9(16)        | 65.2(13)        | -3.2(11)        | 17.6(11)        | -12.8(12)       |
| C2   | 82.8(16)        | 90.0(18)        | 62.6(13)        | 3.0(12)         | 14.3(11)        | -14.0(13)       |
| C3   | 67.8(13)        | 84.7(15)        | 56.9(12)        | 1.7(10)         | 16.8(10)        | -7.8(11)        |
| C4   | 72.4(14)        | 82.8(15)        | 58.4(12)        | 5.0(11)         | 12.7(10)        | -4.8(12)        |
| C5   | 74.1(14)        | 87.6(16)        | 65.8(13)        | -0.5(12)        | 17.3(11)        | -12.3(12)       |
| C6   | 75.5(14)        | 87.0(16)        | 63.5(13)        | 0.1(12)         | 17.1(11)        | -9.5(12)        |
| C7   | 74.6(15)        | 99(2)           | 67.7(14)        | 0.3(13)         | 11.9(12)        | -4.5(14)        |
| C8   | 74.9(16)        | 107(2)          | 77.5(16)        | -9.6(15)        | 10.5(13)        | -16.9(15)       |
| C9   | 94(2)           | 105(2)          | 93(2)           | 1.0(17)         | 15.2(16)        | -30.3(17)       |
| C10  | 97(2)           | 94(2)           | 82.0(17)        | 9.2(14)         | 15.7(15)        | -20.2(16)       |
| C11  | 79.3(17)        | 117(2)          | 74.3(16)        | -9.1(15)        | 26.8(13)        | -13.5(16)       |
| C12  | 65.6(13)        | 88.2(16)        | 68.0(13)        | -4.9(12)        | 16.0(11)        | -2.2(11)        |
| C13  | 61.2(12)        | 74.6(14)        | 60.0(12)        | -2.8(10)        | 11.2(9)         | -6.8(10)        |
| C14  | 65.8(12)        | 67.6(13)        | 62.5(12)        | 2(1)            | 14.9(10)        | -7.3(10)        |
| C15  | 75.6(14)        | 74.0(14)        | 65.2(13)        | 4.2(11)         | 16.9(11)        | -2.9(11)        |
| C16  | 101(2)          | 95.2(19)        | 72.1(15)        | 16.9(14)        | 30.7(14)        | 5.5(16)         |
| C17  | 106(2)          | 106(2)          | 84.8(18)        | 15.8(16)        | 49.7(17)        | 13.1(17)        |
| C18  | 89.4(18)        | 89.2(18)        | 106(2)          | 15.0(15)        | 47.5(16)        | 15.4(14)        |
| C19  | 73.4(14)        | 73.4(14)        | 74.2(14)        | 9.3(11)         | 21.3(11)        | -1.1(11)        |
| C20  | 72.4(15)        | 91.3(18)        | 88.6(17)        | 7.6(14)         | 11.6(13)        | 1.3(13)         |
| C21  | 68.8(14)        | 85.5(16)        | 79.7(15)        | 18.4(13)        | 16.5(11)        | 0.2(12)         |
| C22  | 81.0(17)        | 97(2)           | 95.6(19)        | 19.0(16)        | 16.5(15)        | -6.8(15)        |
| C23  | 124(3)          | 99(2)           | 107(2)          | 1.0(19)         | 29(2)           | -27(2)          |
| C24  | 175(5)          | 90(2)           | 127(3)          | -8(2)           | 56(3)           | -8(3)           |
| C25  | 126(3)          | 116(3)          | 137(3)          | -5(2)           | 55(3)           | 27(3)           |
| C26  | 78.2(17)        | 108(2)          | 105(2)          | 3.9(17)         | 28.8(16)        | 3.2(16)         |
| C27  | 87(2)           | 129(3)          | 105(2)          | -13(2)          | -12.4(18)       | -10(2)          |
| F1   | 69.6(10)        | 159.7(19)       | 104.8(13)       | -13.8(12)       | 28.8(9)         | -18.8(10)       |
| F2   | 93.4(11)        | 118.5(14)       | 98.2(11)        | -19.9(10)       | 33.3(9)         | 2.6(10)         |
| F3   | 108.1(13)       | 168(2)          | 84.2(11)        | 1.9(11)         | 46.1(10)        | -10.7(13)       |
| N1   | 73.9(12)        | 85.7(14)        | 67.2(11)        | 10.1(10)        | 11.9(9)         | 8.2(10)         |
| O1   | 86.2(12)        | 85.4(12)        | 68(1)           | 1.6(8)          | 15.2(8)         | -22.0(9)        |
| O2   | 112.9(16)       | 97.8(15)        | 82.3(12)        | 21.5(11)        | 0.2(11)         | -30.8(13)       |
| O3   | 84.4(11)        | 89.1(12)        | 69(1)           | 11.0(9)         | 5.1(8)          | -11.1(9)        |
| O4   | 84.6(13)        | 117.2(17)       | 101.0(15)       | -5.6(13)        | 0.7(11)         | -25.9(12)       |

O5            81.5(11)      94.4(13)      77.2(11)      18.9(9)      21.9(9)      16.2(9)

**Table S11. Bond Lengths for 3dd.**

| <b>Atom</b> | <b>Atom</b> | <b>Length/Å</b> | <b>Atom</b> | <b>Atom</b> | <b>Length/Å</b> |
|-------------|-------------|-----------------|-------------|-------------|-----------------|
| C1          | C3          | 1.541(3)        | C12         | C13         | 1.360(4)        |
| C1          | C11         | 1.536(4)        | C12         | N1          | 1.355(3)        |
| C1          | C13         | 1.515(3)        | C13         | C14         | 1.443(3)        |
| C1          | O1          | 1.420(3)        | C14         | C15         | 1.401(3)        |
| C2          | C3          | 1.445(4)        | C14         | C19         | 1.400(4)        |
| C2          | O2          | 1.209(3)        | C15         | C16         | 1.389(4)        |
| C2          | O3          | 1.363(3)        | C15         | N1          | 1.372(3)        |
| C3          | C4          | 1.344(4)        | C16         | C17         | 1.362(4)        |
| C4          | C5          | 1.421(3)        | C17         | C18         | 1.416(4)        |
| C5          | C6          | 1.385(4)        | C18         | C19         | 1.373(4)        |
| C5          | C10         | 1.394(4)        | C19         | O5          | 1.364(3)        |
| C6          | C7          | 1.379(4)        | C20         | C21         | 1.502(4)        |
| C6          | O3          | 1.379(3)        | C20         | O5          | 1.435(3)        |
| C7          | C8          | 1.373(4)        | C21         | C22         | 1.370(4)        |
| C8          | C9          | 1.395(5)        | C21         | C26         | 1.371(4)        |
| C8          | O4          | 1.354(3)        | C22         | C23         | 1.368(5)        |
| C9          | C10         | 1.370(4)        | C23         | C24         | 1.362(7)        |
| C11         | F1          | 1.317(3)        | C24         | C25         | 1.380(6)        |
| C11         | F2          | 1.344(4)        | C25         | C26         | 1.380(5)        |
| C11         | F3          | 1.333(4)        | C27         | O4          | 1.421(4)        |

**Table S12. Bond Angles for 3dd.**

| Atom | Atom | Atom | Angle/°  | Atom | Atom | Atom | Angle/°  |
|------|------|------|----------|------|------|------|----------|
| C11  | C1   | C3   | 108.1(2) | F3   | C11  | F2   | 106.1(2) |
| C13  | C1   | C3   | 111.9(2) | N1   | C12  | C13  | 109.9(2) |
| C13  | C1   | C11  | 111.4(2) | C12  | C13  | C1   | 128.6(2) |
| O1   | C1   | C3   | 112.7(2) | C12  | C13  | C14  | 106.5(2) |
| O1   | C1   | C11  | 104.9(2) | C14  | C13  | C1   | 124.9(2) |
| O1   | C1   | C13  | 107.8(2) | C15  | C14  | C13  | 106.6(2) |
| O2   | C2   | C3   | 126.5(3) | C19  | C14  | C13  | 135.3(2) |
| O2   | C2   | O3   | 115.3(2) | C19  | C14  | C15  | 118.0(2) |
| O3   | C2   | C3   | 118.2(2) | C16  | C15  | C14  | 123.7(3) |
| C2   | C3   | C1   | 119.7(2) | N1   | C15  | C14  | 107.3(2) |
| C4   | C3   | C1   | 121.2(2) | N1   | C15  | C16  | 129.0(2) |
| C4   | C3   | C2   | 119.1(2) | C17  | C16  | C15  | 116.5(3) |
| C3   | C4   | C5   | 122.0(2) | C16  | C17  | C18  | 122.1(3) |
| C6   | C5   | C4   | 118.2(3) | C19  | C18  | C17  | 120.2(3) |
| C6   | C5   | C10  | 117.3(3) | C18  | C19  | C14  | 119.5(2) |
| C10  | C5   | C4   | 124.5(3) | O5   | C19  | C14  | 116.3(2) |
| C7   | C6   | C5   | 123.3(3) | O5   | C19  | C18  | 124.2(2) |
| O3   | C6   | C5   | 119.8(2) | O5   | C20  | C21  | 113.7(2) |
| O3   | C6   | C7   | 116.8(2) | C22  | C21  | C20  | 122.0(3) |
| C8   | C7   | C6   | 118.0(3) | C22  | C21  | C26  | 119.2(3) |
| C7   | C8   | C9   | 120.4(3) | C26  | C21  | C20  | 118.8(3) |
| O4   | C8   | C7   | 124.9(3) | C23  | C22  | C21  | 121.5(4) |
| O4   | C8   | C9   | 114.7(3) | C24  | C23  | C22  | 119.4(4) |
| C10  | C9   | C8   | 120.3(3) | C23  | C24  | C25  | 120.0(4) |
| C9   | C10  | C5   | 120.7(3) | C26  | C25  | C24  | 120.1(4) |
| F1   | C11  | C1   | 112.8(2) | C21  | C26  | C25  | 119.8(3) |
| F1   | C11  | F2   | 107.2(3) | C12  | N1   | C15  | 109.7(2) |
| F1   | C11  | F3   | 107.2(2) | C2   | O3   | C6   | 122.6(2) |
| F2   | C11  | C1   | 112.2(2) | C8   | O4   | C27  | 117.6(3) |
| F3   | C11  | C1   | 111.0(3) | C19  | O5   | C20  | 118.5(2) |

**Table S13. Hydrogen Bonds for 3dd.**

| D  | H   | A               | d(D-H)/Å | d(H-A)/Å | d(D-A)/Å | D-H-A/° |
|----|-----|-----------------|----------|----------|----------|---------|
| N1 | H1  | O1 <sup>1</sup> | 0.86     | 2.14     | 2.944(3) | 156.0   |
| O1 | H1A | O2              | 0.82     | 1.87     | 2.613(3) | 150.6   |

<sup>1</sup>1/2-X,1/2+Y,1/2-Z

**Table S14. Hydrogen Atom Coordinates ( $\text{\AA}\times 10^4$ ) and Isotropic Displacement Parameters ( $\text{\AA}^2\times 10^3$ ) for 3dd.**

| Atom | <i>x</i> | <i>y</i> | <i>z</i> | U(eq) |
|------|----------|----------|----------|-------|
| H4   | 3742     | 4045     | 3611     | 89    |
| H7   | 5601     | 2305     | 5062     | 101   |
| H9   | 5630     | 6448     | 4519     | 123   |
| H10  | 4669     | 5914     | 3961     | 115   |
| H12  | 2178     | 3634     | 2841     | 91    |
| H16  | 3186     | 2659     | 1786     | 108   |
| H17  | 4063     | 1043     | 1944     | 114   |
| H18  | 4504     | -171     | 2627     | 110   |
| H20A | 4907     | -754     | 3757     | 107   |
| H20B | 5030     | -72      | 3348     | 107   |
| H22  | 3759     | -2612    | 3052     | 114   |
| H23  | 3742     | -5077    | 2796     | 136   |
| H24  | 4693     | -6260    | 2850     | 156   |
| H25  | 5657     | -4932    | 3138     | 149   |
| H26  | 5668     | -2444    | 3393     | 118   |
| H27A | 7011     | 4233     | 5676     | 180   |
| H27B | 6706     | 2880     | 5348     | 180   |
| H27C | 6350     | 3517     | 5651     | 180   |
| H1   | 2357     | 3828     | 2161     | 95    |
| H1A  | 3126     | -457     | 3686     | 125   |

**Table S15. Solvent masks information for 3dd.**

| Number | X     | Y      | Z     | Volume | Electron count | Content |
|--------|-------|--------|-------|--------|----------------|---------|
| 1      | 0.250 | 0.006  | 0.000 | 359    | 97             |         |
| 2      | 0.750 | -0.051 | 0.000 | 359    | 97             |         |
| 3      | 0.750 | 0.006  | 0.500 | 359    | 97             |         |
| 4      | 0.250 | -0.101 | 0.500 | 359    | 97             |         |
| 5      | 0.191 | 0.156  | 0.151 | 9      | 0              |         |
| 6      | 0.809 | 0.156  | 0.349 | 10     | 0              |         |
| 7      | 0.691 | 0.343  | 0.651 | 9      | 0              |         |
| 8      | 0.309 | 0.343  | 0.849 | 10     | 0              |         |
| 9      | 0.691 | 0.656  | 0.151 | 9      | 0              |         |
| 10     | 0.309 | 0.656  | 0.349 | 10     | 0              |         |
| 11     | 0.191 | 0.843  | 0.651 | 9      | 0              |         |
| 12     | 0.809 | 0.843  | 0.849 | 10     | 0              |         |



## 5. Method of DFT

Our first-principles calculations were performed by using the Vienna ab initio simulation package known as the VASP code.[1-3] The electronic-ion interaction is described by projector augmented wave method (PAW).[4, 5] The energy cut off of the plane waves was set to 450 eV. The electron exchange–correlation function was treated using a generalized gradient approximation (GGA) in the form proposed by Perdew, Burke, and Ernzerhof (PBE).[6] Both atomic positions and lattice vectors were fully optimized using the conjugate gradient (CG) algorithm until the maximum atomic forces were less than 0.01 eV/Å with an energy precision of  $10^{-5}$  eV. A Vacuum about 20 Å at each direction is adapted to eliminate the interaction of two molecular. Sigle Gamma (0, 0, 0) point is used for k sample at Brillouin zone (BZ). The van der Waals interaction is including by DFT-D3 method of Grimme.[7]

1. Kress, G. and J. Furthmuller, Efficiency of ab-initio total energy calculations for metals and semiconductors using a plane-wave basis set. *Comput. Mater. Sci*, **1996**. **6**: p. 15.
2. Kresse, G. and J. Hafner, Ab initio molecular dynamics for open-shell transition metals. *Physical Review B (Condensed Matter)*, **1993**. *48*(17): p. 13115-18.
3. Kresse, G. and J. Hafner, Ab initio molecular dynamics for liquid metals. *Physical Review B (Condensed Matter)*, **1993**. *47*(1): p. 558-61.
4. Kresse, G. and D. Joubert, From ultrasoft pseudopotentials to the projector augmented-wave method. *Physical Review B*, **1999**. *59*(3): p. 1758.
5. Kresse, G. and J. Furthmuller, Efficient iterative schemes for ab initio total-energy calculations using a plane-wave basis set. *Physical Review B (Condensed Matter)*, **1996**. *54*(16): p. 11169-86.
6. Perdew, J. P., K. Burke, and M. Ernzerhof, Generalized gradient approximation made simple. *Physical Review Letters*, **1996**. *77*(18): p. 3865-3868.
7. Grimme, S., et al., A consistent and accurate ab initio parametrization of density functional dispersion correction (DFT-D) for the 94 elements H-Pu. *Journal of Chemical Physics*, **2010**. *132*(15): p. 154104.

Figure S87. Charge computation of **1a** by DFT

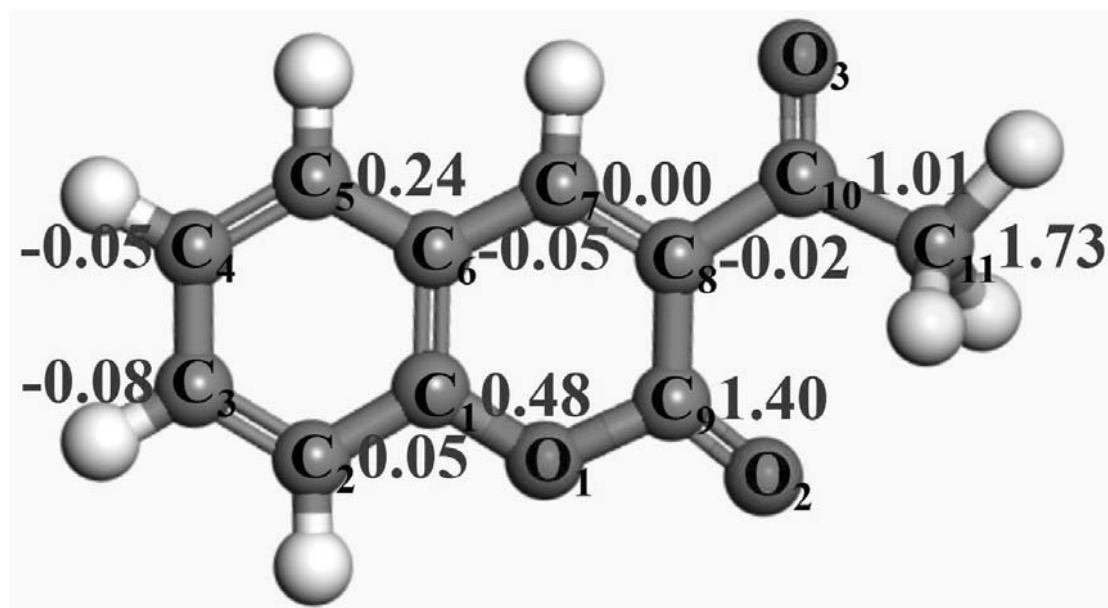

Supplement: d0ra01237h1.pdf [file d0ra01237h1.pdf]
